# Supplementary material for: Extensive Tandem Duplication Events Drive the Expansion of the C1q-Domain-Containing Gene Family in Bivalves
Source: Mar Drugs. 2019 Oct 14;17(10):583. doi: 10.3390/md17100583 (PMC6835236; doi:10.3390/md17100583)
Supplement: Supplementary file 1 [file marinedrugs-17-00583-s001.xlsx]

## Sheet: Chr1
Gene	Type	Protein Sequence
LOC111103937	smultiC1q	MVMKGGLYLVYTFLLRTVLCRSENVAFTLGQTHHLYLSQGQQVTYDKVITNISAHFDHKGSFICRQPGIYAFHFFSLAHAESRIWFELYKNTEYICSVYGYTPHGYADTGNSALLHLNNNDTVSIRAHQAYNSALYGTADQIYSTFTGVLLRSDVTEHSSGNMAFSVGLDHHFHATNGEIVRYNDLIVQNTAYNPLSGRFTAPTDGTYIFYYHGLAQGDQLIWLELYHNADYVNAAYGHTVSGFADAGNTAILHLQTGDQVYVKTRSGRAVDLFGTPSEVYATFSGLLLAPVQHNTDDSRSENSFSVGLSHHFSGTDLIFDRIFSNRGAGYSPVTGHFTAKESGVYVFHFHALSRSDAKVWAELYHNYHYIDSLYGRSNGEFAAGSNAAVLDLVAGDTV…
LOC111123329	smultiC1q	MNLNVNAVLVALSLLSVTDAALRCLRCSDTFEPRLCNRIETCNKGEVCGVRLYRADNGDTGFWTGCMSSLDCTKTANRTVVHAKRDASSHIAGVVLCTECCVGDLCNSEGCGAAGYPTTRGPLCYDCRDVHAPGDCHKIVPCSSNEKCLVEERTVFGQRYFTSRCEHGQTCDSLAIYPFGRRRAIGDKCHHCCHGDLCNNNCNPANAATVGPTSVMTTSTTPVPVTTMNVAFFAQFTTVLSGGRIVFNNMTVNLGNGYNPGTGVFRSPQSGLYMFAFGISSHGNSVQTYLTKNGRAVGVSAITDPKGITVDDSSTSFAVLRLDRDDEISVNRYSAQDPNSGFFAGWKISPLDIDAVAFTVALNQSSSYSSNDIPFNSVVYDNRGSFQIYNSSFTAPFTG…
LOC111104384	smultiC1q	MNLNVNAVLLALSLLSVTDAALRCLRCSDTFEPRLCNRIETCNKGEVCGVRLYRADNGDTGFWTGCMSSLDCTKTVNRTVVHAKRDASSHIAGVVLCTECCVGDLCNSEGCGAAGYPTTRGPLCYDCRDVHAPGDCHKIVPCSSNEKCLVEERTVFGQRYFTSRCEHGQTCDSLAIYPFGRRRAIGDKCHHCCHGDLCNNNCNPANAATVGPTSVMTTSTTPVPVTTMNVAFFAQFTTVLSGGRIVFNNMTVNLGNGYNPGTGVFRSPQSGLYMFAFGISSHGNSVQTYLTKNGRAVGVSAITDPKGITVDDSSTSFAVLRLDRDDEISVNRYSAQDPNSGFFAGWKISPLDIDAVAFTVALNQSSSYSSTDIPFNSVVYDNRGSFQIYNSSFTAPFTG…
LOC111125020	sC1q-like type 2	MWTRITLGFLFLTQTNSLSLLTDGDPQNIPSVDKSGDSNTDVFRQLLNQETLIRMTMDRKVQGILKDIIEMKSDLATNAKQLSDAEKEIITLRNEVRSLKTENQALQAETQKFKQVISKFENKFRDIDENFTDFAWDQEKHEINWNRKIERFQENTSKILDDIKIEVRYLSVTLLDLNKHTMELNSIPSLVDDKFTRYSANLNTSMVEMNHMLLSTKDFQDNVVYNLSALEKDQSRIKILLSETLNSTINTIKSEVEQSQNAHLKLSSAVSSLEVFRMNMSLFNICAKETREGFTVGVTSSGSTWAGDILVFPHVITNDGNGYNPSTGKFTASKKGTYVFSVNVNAYGINTVYFDIVHNGRSTVRTMSHGSASYQTGTNMAVLALEKGDSVWVKRSSGK…
LOC111125028	sC1q-like type 2	MWSRIALGFLFLTQTNSLSLLTDGDPQNITSVDKSGDSKTDVFRQLLNQETLIRMTMDKKVQGILKDIIEMKGSLVTNNQRLNEAEKEIVNLRNENQALKAENLRFNQVISQFENKFGDIDENITDIARGQTQHERNWNNKIERFQENTSKILDDIKIEVRYLSVTLLDLNKHTMELNSSIPSLVDDKFTRYSANLNTSMVEMMHMLLSTKDFQENVVYNLSSLEKDQSSIKRLLSDNLNSTMNTIKSEFEQSQIAQLKLSSAVSSLEVFRMNMSLLNGCAQETREGFTVGVTSTSSSWTGDILVFPHVITNNGNGYDPSTGKFTASKKGTYVFSVNVISYGSNTVYLDIVHDGVSKVRTMSHSSASYQTGTNMVVLALNKGDSVWVKRYTGKGYFTAS…
LOC111125009	sC1q-like type 2	MWSRIALGFLFLTQTNSLSLLTDGVPQNITSVDKSGDSKTDVFRQLLNQETLIRMTMDKKVQGILKDIIEMKGDLATNAQQLREAEKEIITLKNEVRSLKTENQALQAETQKFKQEISQFENNFRDIDENITHVRRNQEKHEINLNKKIERFQENTSKILDDIKIEVRYLSVTLLDLNKHTMELNSSIPSLVDDKFTRYSANLNTSMVEMSHMLLSTKDFQENVVYNLSALEKDQSSIRRLLSDNLNNTINTIRSEVEQSQNAQLKLSSAVSSLEVFRMNMSLVNSCTKETQEGFTVGLTNYNGGWIGSILIFPHVVTNIGNGYNPTTGKFTASKKGTYVFFVTVNTESKNYIYLDIVHNGASKVRTMSHNTASYLTGSNMAVLELNKGDTVWVSRYDG…
LOC111125033	sC1q-like type 2	MWSRIALGFLFLTQTNSLSLLIVGDPQNNTSVDKSGDSNTDVFRQLLNQETLIRMTMDKKVQGILKDIIEMKGILVTSNQRLNEAEKEIVNLRNENQALKAENLRINQVISQFENKFGDIDENITDIARSQTQHERNWNKKIERFQENTSMILDDIKIEVRYLSVTLLDLNKHTMELNSSIPSLVDDKFTRYSANLNTSMVEMSHMLLTTKDFQENVVYNLSALEKDQSSIKILLSDNLNSTINTIRSEVEQSQNAQLKLSSAVSSLEVFRMNMSLLSSCAKETREGFTVGVTSSSSTWAGDILVFPHVITNNGKGYDPSTGKFTASKKGTYVFSVNVNSYGTNHVYFDIVHNGMSKVRTYSDNTASYQTGTNMAVLVLENGDSVWVKRYSGKGYYTQY…
LOC111125015	sC1q-like type 2	MWTRIALGFLFLTQTNSLSLLTDGDPQNITSVDKSGDSKTDVFRQLLNQETLIRMTMDKKVQGILKDIIEMKGDLATNAQQLREAEKKIITLKNEVRSLKTENQALQAETQKFKQVISQFENKFRDVDENFTDVARDQEKHEINLNEKFERFQKNTSKILDDIKIEVRYLSVTLLDLNKHTMELNSSIPSLVDDKFTRYSANLNTSMVEMSHMLLSTKDFQENVVYNLSSLEKDQSSIKRLLSDNLNSTINSIKSEVEQSQNAQLKLSSAVSSLEVFRMNMSLLNGCAQETREGFTVGVTSSSSTWAGDILVFPHVITNNGNGYDPSTGKFTASKKGTYVFSVNVISYGSNAVYLDIVHSGVSKVRTLSHSSASYQTGTNMAVLVLEKGDSVWVKRYSG…
LOC111111539	sC1q-like type 2	MMSGLVVVFLFVVQTNSLSVLTDDKSQATKTDGETVLVRQLLNQETLIRMALDRKVNDLVKGMADLKKNMETSNQQLQDAKREIETNKQQLQDAKREIETNNQQLQDAKTEIAALKNENSALKAKWQVLSNLTTFLSDNLTTTINTVKESQHSQRELSSDVSSLQAFQKNMSVGAVKDTPVAFTAGITSTSGSWDGDILVFPHVITNKGQGYSSSSGKFTAPRDGTYVFTVTVVSYSTNHLRLDIVHDGVRKVRTYSHSSTHYQTGTNLVVLELDRGDAVWVKRYVGRGYYTYSVPLTTFSGFIL*
LOC111122616	sC1q-like type 2	MAKIHSSQITTSLIMMSRLVLVFLFVVQTHSLSVLTDDKSQATKTDGETALVRQLLNQETLIRMALDKKVNDLVKIIAEIQNSLGTNNQQLQDAKKEIAALKNENSALKAEWQVQSNVTTLLSDKLKTTMNSLKQSQDSQRELSSAVSSLQALQKNVSLSAVKDTPVAFTAGVTSSSDSWSGEILVFPHVITNKGQGYDNSTGKFTAPRDGTYIFTLTAVSYNDNVINLDIVHDGVRKVRTDSTGFSRYQTGTNLVVLELYRGNAVWVKRYNGQGYWTHSVPLTTFSGFPL*
LOC111109887	sC1q-like type 2	MVLTLIFAVIISLQVNVNAAEEIPGETLKQEIENLKGLVSALQKTSELNSLKIYSLEKISEDQQRIINQQRAILEKLLVENHGLKNKQQISVLNKANRTFRPEVNQKNGTLRPEVNQRNGTIRTDIGKHQKYGDSGDIRTLKERMQITESRYERLLSEPATVLPVAFYAYMSVPATYSQNHHVLVFDTVKTNIGNSFHHTTGVFMVPTPGLYAFTWTIREYNGSHHSVALVVNNEEYGAVYQNSHALDYDECSTTVVLQLNQGDDVYLRTRVGGGDGVIVSNSYGRSSFSGWKIN*
LOC111136378	sC1q-like type 2	MLSRLILVFLFVVQTNSLSVLTDEKSQATKTDGETVLIRKRSNQETPIRMALDRKVNELVQSMAKMKKEMATNSKQLQDAKKEIAALKNENSTFKAEWHVQSNVATFLSVKDTPVGFTAGITSYNSTWQGDILVFPHVITNKGQGYSSSSGKFTAPRDGTYVFTVVVVSYDYKYLTLDIVHDGVSKVGTYSPGSSSRQTGTNLVVLELDRGDAVWVKRSAGQSYYTHPVPYTTFSGFLL*
LOC111106082	other/uncertain	MNSLKQSQDSQRELSSAVSSLQALQKNVSLSAVKDTPVAFTASITSSSDSWSGDILVFPHMITNKGQGYSSSSGKFTSPRDGTYIFTVTAVSYERNYVRLDIVHDAVSKVSTYSTASVSWQTGTNLVVLELDRGDAVWVKRYGGQGYYTESVPLTTFSGFLM*
LOC111112371	sC1q-like type 2	MVLTLIFAVMISLQVNVNAAEEIPGETLKQEIENLKGLVSALQKTSELNSLKIYSLEKISEDQQRIINQQRAILEKLLVENHGLKNKQQISVLNQANRTFRPEVNQKNGTLRPEVNQRNGTIRTDIGKHQKYGDSGDIRTLKERMQITESRYERLLSEPATVLPVAFYAYMSAPATYSQNHHVLVFDTVKTNMGNSFHHTTGVFMVPTPGLYAFTWTIREYNGSHHSVALVVNNEEYGAVYQNSHALDYDECSTTVVLPLNHGDDVYLRTRVGGGDGVIVSNSYGRSSFSGWKIN*
LOC111113698	sC1q-like type 2	MLSRLLLVFLFFVQTNSLPVLTDEKSQATKTDGETLLVRQRSNQETPIRMALDRKVNELVKGVAEMIMETVTNNKQLLDAKKEIAALKNENSALKAEWQFQSNVTTLLSDKLKTTMNSLKQSQDSQRELSSAVSSLQALQKNVSLSAVKDTPVAFTAGITSSSDSWSGDILVFPHVITNKGQGYDNSTGKFTAPRDGTYIFTLTAVSYNDNVINLDIVHDGVRKVRTDSTGFSRYQTGTNLVVLELDRGDAVWVKRYNGQGYWTHSVPLTTFSGFLL*
LOC111136446	sC1q-like type 2	MALDRKVNELVKGVAEMIMETVTNNKQLLDAKKEIAALKNENSALKAEWQFQSNVTTLLSDKLKTTINSLKQSQDSQRELSSAVSSLQALQKNVSLSAVKDTPVAFTAGITSSSDSWSGDILVFPHVITNKGQGYNNSTGKFTAPRDGTYIFTLTAVSYSDNVINLDIVHDGVRKVRTDSTGFSRFQTGTNLVVLELDRGDAVWVKRYNGQGYWTHSVPLTTFSGFLL*
LOC111118614	sC1q-like type 2	MLSRLVLVFLFVVQTNSLSVLTDDKSQATKTDGETVLVRQLLNQETLIRMALDRKVNDLVKVIAEIQNSLGTNNQQLQDAKKEIQTINQQLLDAKKEIAALKNENSALKAEWQVQSNITTPLSDKLKTTMNSLKQSQNSQQELSSAVSSLQVFQRNMSVLSGSAKDTPVAFTAGITSSSSTWRGDILVFPHVITNKGQGYSSSSGKFTAPRDGTYVFTVTGVSFGKKPLNLDIVHDGDSKVRTWSDNSASQQTGTNLVVLELDRGDAVWVGRYNGGGYWANSVPVTTFSGFIL*
LOC111122800	sC1q-like type 2	MLSRLVLVFLFVVQANSLSVLTDDKSQATNTDGETVLVRQLLNQETLIRMALDRKVNDLVKGMAEMKKDMETSNQKLQDAKREIEINNQQLQDAKREIRTNNQQLQDAKRETEASKQQLRDAIIEIETNNQQLQDAKKEIETNNQQLKDAKKEIETNNQQLKDAKRETETNNQQLLDAKREIETNNQQLQDATKEIAALINKNSALKAEWQVQSNLTAFLSDNLKTTINTVKQSQNSQQELSSAVSSLQVFQRNMSVLTAKDTPVAFTAGITSASDSWEGDIFVFPHVITNKGHGYSSSSGKFTAPRDGTYVFTLTVVSYGSNSLTLYIVHDAVSKVRTYSTGYASYQTGTNLVVLELDRGDAVWIKRGGGRGYYTNSVPLTTFSGFIL*
LOC111103862	sC1q-like type 2	MLSRLLFVFLFVVQTNSLSVLTDDKSQATKTDGETVLVRQLLNQETLIRMALDRKVNELVKGMAEMKKNMETSNQRLQDAKREIETNNQQLLDAKREIETNNQQLLDAKREIETNNQQLLDAKREIETNNQQLLDAKREIETNNQQLLDAKREIETNNQQLLDAKREIETNNQQLQDAKREIDTNNQQLLDAKRAIDSNSQQLQDSQREIQTNQQQLQNATTEIVAIKNENSALKAGLQVQKNITTFLSDNLNTTMNSLKQSQNSQQELSSAVSSLQAFQTNMSVLSGSAKDTPVAFTAGITSSSSTWKGDILVFPHVITNKGQGYSSSSGKFLAPRDGTYVFYLTVVSHETNYHYLDIVHNGVSKVRTYSTGYVRYQTGTNLVVLELDRGDAVWVKCW…
LOC111109589	other/uncertain	MQVQSNVTSYLYDNIRLAKNSIKQYQRTQIELSSAVASLEVFRKNMSLLDGYVEKSNVGFTVGVLSSNFPSLSNDIVLFNYVITNTGLSYNTKTGKFNAPKSGTYVFFVTAVSSYNNTLSFNIVYNGTSKVRTYSDDSAPYQTGTNLVVLVLDKGDSVWVSRGHDKLFTTFKNIPLTTFSGFLL*
LOC111106913	other/uncertain	MLSQKLEITDLKLQQSEEENRIVRRKLKLLTLKLKTEDNMMQDAASKQQLTLRKEKPYTESLQKRLLLMSNETISSHKPRIGFTALTTTHQMHMGVGQAVQFPKIVTNNGNGFDQNTGIFRAPVSGLYLFSASVVSLPGMELRCALVHNGNAVASIFAGDGTTNSSGSKSILLDLSPNDDVWVRIVHESDNVNGYDWSSFMGVLISP*
LOC111104556	sC1q-like type 2	MLSRLVLVFLFVVQTNSLSVLTDDKAQTTKTDEETALVRQLLNQETLIRMALDRKVHELVKGMAELKKNMETSNQQLQDAKREIQTNSKQLQDAETKFETNNQQLQDAKREIETNNQQLQDAKREIETNNQQLQDAKREIETNNQQLQDAKREIETNNQQLQDAKGEIETNNKQLQDAKKEIAALKNENSALKAKWQVQSSLTTLLSDNLKTTINSLKQSQNSQRELSSAVSSLQTLQKNMSLSAVKDTPVAFTASITSSSDSWSGDILVFPHVITNKGHGYSSSSGKFTAPRDGTYVFTVIGVSYSTNALILDIVHDGVRKVRTSADSSDSWQTGTNLVVLELDRGDAVWVKRVGGQGYAVSSVPYTTFSGFLL*
LOC111106934	sC1q-like type 2	MRVQVQVFIFCFSLGCSLGNSETTSDLKILELEMKLSELEKITKMLSQKLTITDNNLTDMILKLKQSEEENRIIRSELKLLTSKLKMEDNLLQDGAEVGPIYFSPKSSKQHLTNFRKQEKPYTESLQKRLPLMSNETISSHKPQIGFTALTSTHQMHMGVDQAVQFPKIVTNNGNGFDQNTGIFRAPVSGLYLFSASMVSHSGLELRCALVHNGNTVAYIFAGDDTTHSMGSKSILLYLSPNDDVWVKVIHESDSVYGFAWSSFMGVMISS*
LOC111106075	other/uncertain	MADKGFSNKDDFLMEGAQLITPEILRKDTQFTVAKNVVNAEISNARIHVERVIAVGFTVSVTTESTTWAGDILVFPHNVTNTGHYNTQTGKFLSPRDGMYVFFVVAVSQTNNVDLRLDIVHDGNSKVRTDLHSSDHYQTASNLAVLKLDRGDTVWVKRSSGKGYHTTTPPYTSFSGFLL*
LOC111112331	sghC1q	MKLLSLSKKTAGKNMFKNIVIGVLLLPFVALGDESCDRKEMEDTICSLCTQRRGTSTSQQTAFSAYMSKNIYIKTLSKHKVFVYDRIETNAGNAYNSATGKFTAPGDGMYVFHTSTAAYDKSDCTIEIVKNDAIKDIGFADAGNHDDRAMSSTMTILSLKKGDVVYVRVGLSLGGNYLESNQYVRMTFSGFKLA*
LOC111122596	other/uncertain	MVDYICNQYVIGTPSPQQTKLEPLKSLGFNISKATVTLNSNDLNQLLNLLGSMFKAPRIGFSVSLKRHSFTYGTRQTIIYDNILTNDGNGYDDRTGVFTCPVAGTYMFVVDALCKEATYLALDHNKTPIAFLHRDSQYSKNPLVQISRTVLLKLTKGDHVKVSVGKHVFMNGYDYSGFTGTFLY*
LOC111112354	sC1q-like type 2	MRLQFVLFFVSFSCSLGYAETTSDLKMLELEKKLSELEKITMMLSQKLTITDNNLTDMILKLKQSKEENSIIRRENLFIRRELKLLTSKLNLMQDNSSVGPNYISPESSKQQFTNFQKQEKPFTESLQKRLLLMSNETISSHKPRIGFTALTDSHQWHMGIGQAVQFPKIVTNDGNGFDQNTGIFRAPVSGLYLFSASMLNHSGLELRCALVHNGNIVANIFAGGGTTYSTGSKSILLNLSPNDDVWVRITHESDNVFGDSWSSFMGVLISP*
LOC111120397	sC1q-like type 2	MLMKTVLISTFFLCFQCEPLRNTATDEQGNGSKLVPQVEQIDIDKELQKELNTLESRLAFVESTFQNFLNGYNDLKQNYGNLKTQYSQAMARIHQLENVTQQTRQEISAQNSQYSTLESINSNLQKTVDNTNVRLSNSTSVLWTEISNVTDEVINISDMTNRSFDFLKNKNVILENKFQEISKNQSSIVSALNHITSPGSRNSNLVVFVAQLSREILISTHEIIIFDKSQLNEGHGFDSTTGVFTATTQGIYTFSASVESDNRDVRGAIYRNNEPFVYILGLFVDQKGAFASAMSYVHLDEGDRVWVQWTGGVNGRIGHFRSQFTGHLLREDFTIS*
LOC111102221	sC1q-like type 2	MAQRKFEPILFILCSPLLFVSALTSDDLQGKEVMSLRRTVEELREIILNQEQRLSAVESRCQSLEKRNEVNSNEVKELNVKILEQNAMILDLLHKQSVCDSKIQNMTGKLESAIRHPTPENTEVKSQRAEGSANSRKERLLVAITTTPSTNENTVAFYAYSTHKLTSPSSLFVLTFDNVITNVGNGYHHHSGLFIAPRTGLYVFTWSFRIQNDAHISTELVVNESAKSAVYFDAHPGVGGNEAGTVVTYVNQGDEVFVRVTQMNDLGDILSDRIGRTYFGGWMIS*
LOC111113377	sghC1q	MYGNFVLVLLLPFVALGDESCDRKEMEDTICSLCTQRRGSSASLTGQQTAFYAYMSNNIPINTLSKHKAFVYDRIETNAGNAYNSTTGKFTAPGDGMYVFHTSTAAYDNSYCTFEIVKNGEIKDIGLADAGNHGDRALSSTMTILSLKKGDVVYVRVGIYYSGDYLESDQYVRSSFSGFKMT*
LOC111128181	sghC1q	MKMTRTVLLVLMSSLGLVLGGSSLPANTKTRFGLLKSLILANSGTTIILDQPPSKGSRNCQDRVSFSANLNSTHRTLGAGQTVIYDDILTNDGNGYNSKTGVFTCPFAGTYMFVVDSLSYPGIWLKLKVNKHVVAILHVSPLIKDKHVLTQISRTAILKLKLGDHVKVENTAKNGEVFAHRYSGFSGTLLY*
LOC111128172	sghC1q	MYIHHSIKMIRIVLCVWLCCHCLVLGGNRLQVDTTTRFDLLKSLVLANSRTTVTLDSAAMQKIDQLSLRGSGDHSKATSMPKKISFSVNIKAKHRTLGAGQTLIYDNILINDGNGYDNRSGLFTCPVTGTYMFVVDSLASPNIWLNVKVNNNRVLARLHVGGGELKENTLIQISRTIIVKLNAGDYVKVENQHHNGRLYHDSYSGFSGSLLY*
LOC111138320	sghC1q	MNVMLGISLCCLLSNAAKVSVSQQTKLESLKSLIFNNAKATVILDSSDLKQLLKLSRSTPVSATSPKPGVGFSVYVKASHLTLGKGQTVVYDGIMTNEGNGYDDRTGVFTCPVAGTYIFVVDALCQPATWLALTLNKKVIAHFHSSNLYSKNPLVQISRTVLLKLTKGDHVKVVSEGDKVFMYGYSYSGFTGTFLY*
LOC111120958	sghC1q	MLLQVFSLVLSVHLCYGDLYCLTCSEVVSPRHCKSIRRCNDGQVCYTEKYRSITGETLFNVGCQTPRRCVSTKVNPLLQRLTGSRRYVYNPDTTECIECCSTANACNRDGCGSPDYPIIRGPACFDCQQTRDPRLCRSVAVCMEGEVCQTYMKTTFSDKIYTLACAPDFVCSQEYVKADRCNQCCKSDFCNKDLCDAPEGQIGFHAVLDRDQGSGLLVFGSVVTNVGQGYDPQTGYFTPKTSGTFVFTWNLESYAQSVVAVLEVNDKKITTTQTQLSTYPNYSGSSFAVLNLKPEDNVGLRLLIGTANKSFTMFNGWRQSPDEMPALYIVPNFENLSSNLTIITDNNVLAFNTSDMVTCTMENGFYLLMDSNRDQLMTYKDGYPKWMNRTNFPIFNYDN…
LOC111109793	sC1q-like type 2	MIAHFCVLALFFAPFGTAESNSNGCISREEFEKFKTDVLNRIELLTVEKNQQIEDQKKTILDLKSLLARFDDTSPISVHHEDLENNSTEDIPLHVSEDASSEPLPVRRLAPMKRLSSAAIRAPEDVIAFSAFLTNKEINPGAHHIIVYDHVLTNSGNGYSKHTGAFVAPRAGFYVFSWTTFANPGSYFPIELTVNSARAGIVFVQGDTTYNGVTGVAVVQLQQSDAVMVRSEPGYTPHGDIYSEHNMQTSFSGWCISC*
LOC111115609	sghC1q	MNVMLGISLCCLLSNAAKVSVSQQTRLESLKSLIINNAKATVTLDSTDLKQLLKLSRSTSVSATSPKPGVGFSVNVKATHLTLGKGQTLVYDGILTNEGNGYDDRTGVFTCPVAGTYIFVVDALCRPATWLALTLNKKAVAHLHRSSLYSKNPLVQISRTVLLKLTNGDHVKVVSEGDQLYLYGDGYSGFTGTFLY*
LOC111104546	sghC1q	MMYKNLVLFLLLPFVALGDESCDRKEMEDTICSLCTQRIGSSGSQQTAFFAYMSKNVPINSVSKYKAFVYDRIETNAGNAYNSATGKFTAPGDGMYVFHTSTPAHDKSHCTIEIVKNGVVKDIGWADAMDHNDRALSSTMTILSLKKGDVVQVRAGITYGGNTLESNQYVRMSFSGFKLA*
LOC111125331	sC1q-like type 2	MNMLAKLSSAVTILFLFVSKIFVDADLSPELREIFQRLDVLERNVTKLGTENKELKEDLRKQKESFDNYKSIMSTKHDDFTRQDLMMQKDIKFIKFKDLKSIDTTLIQMASDLSSTKTNVTERFAELENDIKLKARLDDVARIDMRLQEAMDGLETLKKVVNDSNANVVNKIDNDVNGVMNALTLKMRTQTEFNGKQSKKLEDMENSVTELQHSLVGVDSILQNRTPPSFYAFMSYPVAVTGPQQRMVYDTIRTNNGNAYNNSTGIFIVPETGTYVFSWTCFSYVEEYIRLEIVVAGTIYGGTLSDTQETGDADTETGLVVVNARAGDEVFIRTQNNGPGNGRLYVEFESVSTFSGWKIS*
LOC111121419	sC1q-like type 2	MSWSCLWAVCACLLVGVGAEETCDAQREEMENTICSLCAQRVDSRLKDMGKIQVAFFAYMSNNILISSLSANKTFVYDRVETNVGNGYDVTTGYFVAPEDGVYAFHVTTLARDKSHCSVELVQNEEIKDIGWADAMDHPDRASASTFTILRVKAGDVIRVRVGQAKGGNLLESNQYARLSFSGFKIV*
LOC111111768	sC1q-like type 2	MFPAGLGILFCSLICVVFGIQNGNGEDFNQICSENIRVLQRELDILRQELKYQGEEIKRLKKEGYPNSGHTRNSMKAERSSVKTDHTHDEVFQTDSNGLSHDVNSYPEKIFRQGRLLMPLNSSSPDNSPRIAFYANTVKDNVDLGVHHTLIFGNDVTNEGNFYHHANGNFIPNVSGVYVFHVQILLCSPGHELRTELVVEGVVKAAHYTGDTNNCSNGGGMAILHVNAGDSVWVRVRSSDGANNVAWESSFAGFLLYPQQ*
LOC111108161	other/uncertain	MVGTNDDAVTFYSERNQPIPRIVPPDSYPVSAVAFYGYMSRSSAPNLPTHHLIVFDLVLTNKGNGYNKGDGIFIAPVTGVYAFHFSVCVIPGPESPWAMLELTRNGNALGSTFEESKSSGYGAYHCSSTLVISDVVVGDHIFIRTNQATRGPIYSGGSGGTSFSGWLLFR*
LOC111109673	sC1q-like type 2	MSYAFCLMLVIFSVANGSEENSWREEIEKRLSILEESNIHLQKENKELKALVLDAQHENKRLKSELKDLGERVNNCEGLTYRQDRQDEDTERVSQTMESVVRTNDDTVTFYSERNQPIPRIVPPDSYPVSAVAFYGYMSQSSAPNLPTHHLIVYDMVLTNKGNGYNKGDGIFIAPVTGVYAFHFSVCVIPGPESPWASLELTRNGNALGSTFEESKSSGYGAYHCSSTLVISDVDVGDHIFIRTNQATRGPIHSEGGGKTSFSGWLLFR*
LOC111107752	other/uncertain	MKVMWERTENYKATVNNECNARYIPICCLLSNAKKDSVSQQTKLESLKSLIINNAKATVTLDSSDLKQLLKLSKSTSVNATSPKKPGVGFSVYVKAKHLTLGRGQTLVHVYDGILTNEGNGHDDRTGVFTCPVAGTYMFVVDCLSISQSSLNLKLNKAKVASLYVKVKNEKHPRPYLQISRTVVLKLKVGDHVKVVSGGIDEFIHNNYYSGFTGTFLF*
LOC111111460	sC1q-like type 2	MAIPSTSKCVLVLCLLNYTVSLVASDERKDAPNDACLEYIRALRQELQILRQELRIQGKRIERFEKELAKTSHHSRDSRSPKKNHFSTKRVEYKDEIHLEHNVSRKYENYTNSSFRTRFPRQPKSMFNNVNTHLDRITRFKRDRRLQISFYANTVRPRFNLGVHQTLIFGNVITNDGNCYRPSSGHFRPSRSGVYVFHVQILQCHSQHTFRTELVVEGVVKAGHYTGDSTHCSNGGGMAIVHVNTWDSVWVRVRTSTGANDIAWESSFSGFLLYPR*
LOC111136343	sC1q-like type 2	MSYVFCLMLIIFTAVSGSDDNSWKEEIEKRLSVLEESNIQLKKENEELKALVLDFQHENRRLKSELKDLGKRVSNYDGFFHRQNVDSERVSQTMKSDLKTNDDYVTFYSGRNQPVPRIVPPDSYPVSAVAFYGYMSKSSAPNLSPHHPIVYDLVLTNKGNGYNKGDGIFIAPTTGVYAFHISVCVINGPEIPWACLEITRNGNALGSTFEEGTVSGSGYHCSSTLVITDVDVGDHIFIRTQRATRGPIYSGDIGRTSFSGWLLFR*

## Sheet: Chr2
Gene	Type	Protein Sequence
LOC111121043	sC1q-like type 2	MSYLLTVGLFCCVLLANGVYTLNLEDVQLNNSVFQELLVRIREQDAKIATLEAMISADRKDYDVRMEQSDSKMKVLEDTIETLKKLILKSESQPSSDRQLKMFPGSEKNHKTVAATISRPLEAHAAPDDLIPDPGDEEGQVKTKRVAPGAAAAPAHIVAFHAYLSSPDGSSDKSHTIVFDTVITNAGTAYNKRDGLFTAPSEGVYVFNWVVYSQHQGDVITELVVNASSRGCSRADSHTLDEHHSASGTVVVHLAQGDVVSVKTHSVWASVGGVMSFTDYYKSSFSGWLLV*
LOC111119889	sC1q-like type 2	MRFSALVLGLVLSVAAVCRGDDDMNFSNQDVMPTLREVHSMMVEWRNSQKLQDEKMRALQSDLNQERLLRKELEARLDILEEQCKATSEISAVRQSDVTTDKTMVSAAEIKKLSRTRPLTSKTHKTTKRNGEDSTFRKLLMGQEPTPHNTVAFYAYMSHDIAAPSVGHILVFNVVKTNVGSAYNHHDGIFTAPSTGSYVFSWTVTSWDHSYVYSELMVNSSSFGKLVTSSEEINDVHVGSSVVAVALTQGDVVYVRVAGSSGTLASQSNVYTSFTGWKLF*
LOC111119888	sC1q-like type 2	MQFSGLVLGLILFGSVVCRGDDDMNFSNQDVMPALDDYVKRLVEREVHSMMVEWRNSQRVQDAKIRALQSDLHQERLLRKELEARIDILEEQCKTTSEISAVRQSNVTTDTIYNAAGAEKLNRTDPLTSTTNVTTKRNGEGSKFRRLLIGQEPTPHNTVAFYAYMSHDLAAPSAGHVLVFDVIKTNVGSAYNHHDGIFTAPSTGSYVFSWTVTSWYHSYVYSELMVNSSSFGKLLTNSDEINDEHVASSVVAVALTQGDVVYVRVAGSKGTLASRGNILTSFTGWKLF*
LOC111121172	smultiC1q	MQAVAALFLLGLPLLAAKPGNMILRKEEYCSGPPGIPGTPGIPGHNGANGLQGERGLKGDTGDPGQPGVQGVQGLMGPPGKTGERGRRGKKGVTGEKGEQGQQGRVGVEGRLGPKGSKGEPAVLPPSVAFSASRKWPLGPVREDTIITYDQVFLNLGGSFDVFSSHFVCKVNGTYLFTAHVLGTLDNNAYAWIMYNGQPMVPMHGDHRAGYGTGSNTLIYHLVRDDHVWVQLMKNSSLLNDYSTFSGYLIYKDV*
LOC111120578	sC1q-like type 2	MAIIIISMVLLGVCFQHSLASDIKSPKDEIADIRKLLQDQNERILKLESENLALKSRLTHVEGDNADLREQVVGVAKKHELLQDEVVNLRRQLSEMEELPEQTNPQTSGVLLKDNASPSNTKNRRLLALVTDPPTASVDLVAFYAYMSKPEPNPSNHFTLIFDVVRTNLGNGYNKHSGTFVAPSAGAYVITWTINTSPHGAHHINLMVNSAIAGGTLTDTEETGDYDSDSNTAVLVLNQGDSVNLRITYPSVGILYADSRAFTSFSGWKL*
LOC111122322	sC1q-like type 2	MVRFSRVCVFLCFASVTLVAGRLEEEDREWKIQMEKRMEEMVQMIQRQKQVIDGQTKTIEKQALEIKHLQTRVVALEDQSETSDKSDEILPDETNYDGNQALSHENLRLHNKVSKSHLIRRFLTPGEAEGHVAFYAYISKDFGHVGQNHVYLYDTVVTNYGNAYSQHTGAFTAPTTGVYAFCYTAYASGEHVAGETGDYGEVSVQIVHNGAYKGSIYVDTETNYEEEMATGFAILMLQTGDVVLTTSKTAGQGSFHSNPTGRWSFSGFQIA*
LOC111118327	sC1q-like type 2	MARFSRVCVFLCFASVTLVAGRLEEEDREWKTQMEKRMEEMVQMIQRQQQVIDGQTKTIEKQALEIKHLQTRVVALEDRSESLDKNDEILPDETNYDGNQALSNENQRLHNKVFKSHLIRRFLTPGEAEGRVAFYAYISKDFGHVGQNHVFLYDTVVTNYGNAYSQHTGAFTAPTAGVYAFCYTAYASGEHVAGETGDYGEVSVQIVHNGAYKGSIYVDTETNYEEEMATGFAILMLQTGDVVLTKSGVIAEGSFHSNPTGRWSFSGFQIA*
LOC111122383	other/uncertain	MSFLLCWCSLILILVSPFQRISANDQTFAICADQKGFIRCEKGSKIKVISALYGRTDDKVCPYGNTNSRSCRSLTSEMKVKWSCNGYRTCHLHASNQIFGDPCHNVSKYLEVKYLCMKGPDVCFKGKEIVAFNAYTKNHLTPNRNSPVNVVYDAVYYNYGNAYNPQSGYFTAPSDGLYVFTWSSLVDSKKIFDAEILVNGKRQGLGNCNNEGNPGYENCANTVPLVLTTGDKVNIRTTNANLLHMVWSSFKGWKVQ*
LOC111121464	other/uncertain	MFPLCMELFAFFLVFSILGVSATDPAFALCNGQKGFIHCGEGTKIKILSANYGRTDGDICPGGNTATRNCRSKTALNRVKWNCNGYRICHLHASNHLFGNPCVNVSKYLEVKYRCVKKSDGDLIGKQIVAFNAYINKHLTLHRNTPVNVVYDAVYYNYGNAYNTHSGFFTAPSGGLYVFTWTSLVTARTIYNAQIMVNGQGKGLGNCDNLANPGFENCANTVPLLLKTGDKVNIQTTHANFLYMHWSSFKGWKVQ*
LOC111122207	other/uncertain	MLFVLYWCLSILILGSPFHWIHASDQAFAICADQNGFIRCEKGTKIKIISAVYGRTDDKLCPYGDTNTRTCRSLTSDIKVKWSCNGYKTCHLHASDQIFGDPCQNVSKYLEVKYRCIIKEDQDTRVKGKQIIAFNAYVAKDMTFHRNTPVNIVYDTLYFNYGNAYNPHNGFFTAPSDGLYVFSWSSLVVANTIFDAAILVNGRTKGLGNCNNEGNPAHENCSNTLPLVLKTGDKVNIRTTNANFLRKYWSSFKGWKV*
LOC111122203	other/uncertain	MSFVLCWCLLILILVSPFQRISAYDQTFALCADQMGFIRCEKGTKIKIISAVYGRTDDNVCPYGNTNSRSCRSLTSEIKVKWSCNGYRTCHLHASKQIFGNPCSNISKYLQVKYRCMKGPDGGKEIVAFNAYIKNHLTLNRNTPTNVVYDTLYYNYGNAYNPYSGYFTAPSNGLYVFTWASLVDPKKIFDAEILVNGQRKGLGNCNNLENPGYENCANTVPLVLKTGDKVNIRTITADYLHWQWSSFKGWKVQ*
LOC111120612	other/uncertain	MFSLCVELLAFFLAFSSSVVSATDPAFALCDGQRGSIHCGKGTKIRILSANYGRTDGDICPGGNTAARTCRSKRTLTRVKWSCNGYRICHLHASDQLFGNPCVNVSKYLEVKYRCVKKSDGDLKAKQIIAFNAYISKHLTLHRDTPVNVVYDAVYYNYGNAYNTHSGLFTAPSGGLYVFTWSSVVSPRKIFDAEILLNGQRRGLGSCNNELNPGYENCANTVPLVLKTGDKINIRTTTANFLIQKWSSFKGWKVQ*
LOC111120224	other/uncertain	MFQAFTLCHGQRGSILCGEGTKIQILSANYGRTDGDICPGWNTAARTCRSKTALNRVKWNCNGYRICHLYASNHLFGNPCVNVSKYLKVKYRCVKKSDGDLKTKQIIAFNAYINKHLTPHRNTRVNVVYDAVYFNHGNAYNTHREFFTAPFGGLYVFAWTSFLAPRKIFEAEILLNGQRKGVGNCNNLGNPGYENCANTVPLLLKTGDEVYIRTSDANFLHAHYSSFEGWKVQ*
LOC111121403	other/uncertain	MLFVPYWCVTVLILVSPFHWINAYEQTFALCAEQKGFIRCEKGTKIKIISAMYGRTDDKVCPYGDTNSRTCRSLTSEMKVKWSCNGYRTCHLHASKKIFGNPCINFSKYLEVKYRCVKYAADGVNDKTPVAFNAYITKDLTMDKKTPVNVVYDAVYFNHGNAYNPYSGIFVAPSDGLYVFSWTNVVGPTKLFDSEIVVNGIRKGLANCNNEKIEWYANCSNTVPLVLKTGDKVNIRTLAANHLLRFWSSFKGWKA*
LOC111120611	other/uncertain	MIPQYVEFFAFFLVFSIPGVSATVPAFALCHGQRGSILCGEGTKIKILSVIYGRTDGDICPGGNTAARTCRSKTALNRVKWNCNGYRICHLHASDKIFGNPCVKASKYLKVKYRCVKKSDGNLKGKQIVAFSAYTSKHLTLHRNTPVNVVYDAVYFNHGNGYNSHSGFFTAPSGGLYVFTWTSLVYPRKIFDAEILLNGQRRGLGNCNNELNPGFENCANTTPLILKTGDKVNIRTTIANYLYAHWSSFKGWKVQ*
LOC111120252	other/uncertain	MLFVSYWCLFVSYWCLTVLILVSPFHWINAYEQTFALCAEQKGFIRCEKGTKIKIISAMYGRTDDKVCPYGNTNSRTCRSLTSEMKVKWSCNGYRTCHLHASKNIFGNPCINFSKYLEVKYRCVKYAADGVNDKTSVAFNAYITKDLMMDKKTPVNVVYDAVYFNHGNAYNPYSGIFVAPSDGLYVFSWTNVVGPTKLFDSEIVVNGIRKGLANCNNEKIEWYANCSNTVPLVLKTGDKVNIRTVAANHLLRFWSSFKGWKASFLEHIIKLVFITVANLTLKMLVAHRTLKILVAHLILKMRVAHLTLKMLVARLTLKMLVAHLTLKMLVAHLTLKMPVAHLTLKMLVAHLILKILTSNDRNFGGKGRKVV*
LOC111122262	other/uncertain	MKVKWSCNGYRTCHLYASDQIFRNPCSNISKYLEVKYRCVKGPDACLKGKEIVAFSAYNKKHLTPHRNSPVNVVYNAVYYNYGNAYNTQSGYFTAPSDGLYVFTWASLITSKNIFDTEILVNGVRKGLAACNNELNPGYEIVQTPLRWS*

## Sheet: Chr3
Gene	Type	Protein Sequence
LOC111124326	other/uncertain	MYDYNDDIQRTNFDLKTAITDNNRDLLTFTVPTSSTLQSLQETTRRQDELINDLLQRNNAQEKRIQELETALKIQNRSNRQDGRLKDKEIKDNPVSLILERFLTLPIWALPYKTTSKSEKDWYLTERLLASVIPFTNPAYESGIAAFYARMSSIEPNPSAHHTLIFDNVHTNVGSGYNGVTGIFTAPQEGIYVFTWVIRMVTAEHSTELMHNNDVLGATFLRAKNGDDGSVSECLLASIIPTTNPAYESGVVAFYARMSSDEQNPSAHHTLIFDNVHTNVGSGYNGVTGIFTAPQEGIYVFTWVIRMVTAEHSTELMHNNDVLGATFLRAKNGDDGSVSGTVVTHLTKGMLSCAESLAICRGWQY*
LOC111124626	other/uncertain	MDSELIRIYITEGVDWVITVLPLTCSSGFAATTENKAKERRGNGVRTNRLQCVKTFQVKHCKCPSTTELYQKNFKDQRPNTVMKSVICTLLVAFVSFEVEAESNAVAFSAGLSRNLQLSHTEIVVYDRIYTNVGSGYDSNTGKFRCPTSGVYVFQFHSVANQGKTIWTELWHNGYYICSMYGHTTGDYATGGNSVVLRLTKGDEVYVKAVDPTNGAITNMYGASDEVYSTFSGYMVAPVYEEFPSVVG*
LOC111126749	sghC1q	MKHGYGLLMVVFLTICHYSEGKDGKLMKRGVPNLYECIVKTCLARDRVKCNEKGFYQKVAFTAAVTSISRTWNSGTLVFDAIISNVGNGYNPRTGVFTAPMNGAYVFYVSCIEFESQDLRLEIVLNNVSKVRTLSYRAAEYQTGTNMVVLSLREGDNVWVKHYYGRGYYSQSIPLTTFTGFMI*
LOC111127203	sghC1q	MWTKIVILSFALISTIKAQSGPGGTSLGDHGHGSVAFSVGLSRTMHIANAETVVFDKVFSNVATGYSDHTGIFKCPQSGMYVFHLHAYDMNTDKAMWLELKKNNELLVSISGYDSHATAGNTVLVHLNRGDTVYVKARQGQEFSLFGRNDEIYATFTGYKVSDASYQAPPAPDQDPFAFLNGGRR*
LOC111125616	sC1q-like type 2	MVSTITICNILGLQLMLVLGNNSIQDNQNAMILRKLSELEEEVSMLKEKIKSCTTLDAASKERRIVPQGEHSHVAFQVHLSHNLQSLGLHQAILFDSVVLNEGGGYSVHSGEFVAPVSGLYVFSWTISAGDRTCTKYDIVKNSAVLMYFISDAYDHDDWDSSSGTVVTRMNSGDRVWLRIADMLTCSHWVFGIGYGTSSFSGFLLH*
LOC111124934	sC1q-like type 2	MVSTITICNILGLQLMLVLGNNSIQDNQNAMILRKLSELEEEVSMLKEKIKSCTILDAASKERRIVPQGEHSHVAFQVHLSHNLQSLGLHQAILFDSVVLNEGGGYSVHSGEFVAPVSGLYVFSWTISAGDRTCTKYDIVKNSAVLMYFISDAYDHDDWDSSSGTVVTRMNSGDRVWLRIADMLTCSHWVFGIGYGTSSFSGFLLH*
LOC111124880	sC1q-like type 2	MTLLLLSLCVLFAPVATSKLTTFLKDTNLTSVEERLSFLEQKMERHLGTTERVLGQLLTGHADARLEDLDILTLRSGLLSERFNPVLFSAYKSSSESGISDKVTIRFESTYINIGEHYHTEDGIFIAPVSGIYMFHWTIATGGSALSTQLMVGGTVKASNLVPYPGGADSSSAMVILSVQKEDHIWIQIHGSNKHVYGASSSFGNYQSTFSGILLQKT*
LOC111124877	sC1q-like type 2	MARLLIFLCVLFAPVATSKLTTFLKDKNLTSVEERLSHLEQKIESRLNATERVLGQLLTGRADARLEDLDILTLRSGLLIERFNPVLFSAYKSWSKTGISTKVTIRFDSTYINIGDHYHTEDGIFIAPVSGIYMFHWTIATAGSDFSTQLMVGGTVRASNLVPYPGGQDSSSAMVIINVQKEDHVWIQTYGSSVYVLGGISTIGYSYQSTFSGILLQENKI*
LOC111124282	other/uncertain	MGNGYDSTTGVFTCPNAGTYAFLVHGVSTATSQLNLDIYRNNNYTVSVFAHIHNGYASGHQSIVLQLDEQDAVFVQGRGVNSMYGASHEIYSTFSGFLVAPTQLPPSNPNQGLIG*
LOC111124878	sC1q-like type 2	MTLLLLSLCVLFVPVATSKLTTFLKDKNLTSVEERLSFLEQKIESRLGTTERILGQLLTGQADARLEDLDILTFRSGLLSERFNPVLFSAYKSSTESGISTKVTIRFDSTYINIGDHYHTEDGIFIAPVSGTYMFHWTIATGGSVFSTQLMVGGRARASNLVPFPGGGDSSSALVIINVQKEDHVWIQIHGSSEHVYGGPSSIGYNYQSTFSGILLQKT*
LOC111123522	sC1q-like type 2	MFFLLVIIVGLYTPVYSSKLTTFLKDENLTDVEERIAHLEQSIERRLNVTGRVLGQLLTGYGHANLKALDVLALRTGILGSKFLPIMFSAYKSSSESGISSGVTIRFDQTYINLGSHYHTEDGIFIAPETGVYMFYWTIATGVSAYSTQIMVGGTSRASNLVPRPGAASSSSAMVILNVQKEDHVWIQIYGSDKHIYGGGTSFGNYQSTFSGILLMKT*
LOC111124879	sC1q-like type 2	MFFLLVIVVGLYTPVYSSKLTTFLKDENLTDVEERIAHLELSIERRLNVTGRVLGQLLTGHGYANLKALDVLALRSGMLSSKFLPIMFSAYKSSSEVSISSGVTIRFDQTYINLGSHYHTEDGIFIAPETGIYMFHWTIATGGSAYSTQLIVGGTSRASNLVPRPGAASSSSAMVILNVQKEDHVWIQIYGSDKHIYGGGTSFGNKQSTFSGILLLKT*
LOC111123523	sC1q-like type 2	MACKEIMLLIITFFCFCASVSYTEITNLEQRLTNIEQVIEDRLNTTERILGQFLTGRNDANLAALDVLSLRTGILDAQPEPVIFSAYKISSDSGISTKVTIRFDRTYINLGSHYHTENGIFIAPTTGVYMFHWTIASGSSDFTTQLMVEGNPMASSYVPYPGGADSSSAMAIIRVNKDAHVWIQIYGSSEYVYGGSNSIGNNYQSTFSGILLKS*
LOC111124881	sC1q-like type 2	MACKEIMLLIITFFCFCASVSYTEITNLEQRLTNMEQVIEDRLNTTERILGQFLTGRNDANLAALDVLSLRTGILDAQPEPVIFSAYKRSSESGISTKVTIRFEQTYINLGSHYHTENGIFIAPTTGVYMFHWTIVSGSTDFSTQLMVEGNPMASSYVPYPGGVDSSSAMAIIRVNKDAHVWIQIYGSSEYVYGGSNSIGNNYQSTFSGILLKS*
LOC111123094	sghC1q	MLKYSQVRRQAHLLVVLMHIQMFVRKRSIHQNQTSHDEPISFYAYMSAPMNNLGGHHTLIFNVIKTNQGQGLSRTTGVFRAPQSGIYVFTWTIRVFNHSIRCVELIVNGQPVGALVAHTDGTYNNMDSTTVVIHVNEGEDVFLRTMMQYNKGGIFSDSYGYSSFAGWKLS*
LOC111125692	sC1q-like type 2	MALNLHSFVIFGLFITVPNLIVSGSIERKLTVSKENALEGKIQQLQTSMDFQNSRFEIFEAANSALQSELDNQKRKIHNMEIVIRHLSETVEKQRDELDFVYKKLQGSAVEHRDENYPNSGRAIAIDKSKSQDQNKRLLVNTMTLPVAFQAYLRNVQATPNGHQTIIFDNVELNVGNGYHPTSGVFIAPETGIYAFSWSIRLFGNASHSAQLMVGDQEYDGVYLSVRNGDNENVSGTAVAQLEQGTDVFVRTHAAYNWGDIHSDPLGRTSFCGWKIH*
LOC111123095	other/uncertain	MNEVSSGNKTNINQSGGQSKIKRRSHRINPSTSHNGPISFYAYMSNSMGNVGGHHTLIFNVIKTNQGQGLSRTAGVFRAPQSGFYVFTWTIRVYPASIHCVELIVNGQPVGALVSHTAASDNETGSTTVVIHVNEGEDVFLRTTMHYNSGGIVSDPYGYSSFAGWKLS*
LOC111126862	sghC1q	MVRLQGFFVFCLLLSIELVEGNCRNTNLRLLDDQIQAIQKSVRTIVNERSCTSNKGQVGFHAYMGTSKTYAKGAVFVYDQVVTNTHNAYSATTGHFVVPERGLYIFSYDTLSDPGKESHGSLFVNGKAKCWQACNNSGGRIYITCSTTAILLLAKGDVVYVADYARTATVREHYTDFSGAKLN*

## Sheet: Chr4
Gene	Type	Protein Sequence
LOC111129251	smultiC1q	MPNTAVLFVCLVGTVLPVSSLKCLKCSDVTEPRLCNRIEHCSPGEVCAVQKITADNGDIGFWTGCLPQQQCTKVINRTVIETRANNRFLTGDVKRTGSITGDVTCKECCSSDICNAYGCGSPEYPIERGPVCYDCQDVLNPSDCHKLVPCDLDEKCSLQERVVFGQRYYISKCMRSSMCPSDFIGEVIGRRRREAASLCAHCCDGDLCNDQCASAMTKHVEETSISYTTTPTFASSISPPPPTFVAFTARTSKPVTEGPVIFDQEITNIGNGYSTNTGMFTVPANGLYAFSWTTETHGELTETSLVANGVSRGSAIAHEIESHYDTTTSFAILELQANDIVYVNVTQGRAQGERTMFSGWKINDKDRIPAFYSSLSAISNTNNIVYDNVYLNEMSGYTP…
LOC111130450	smultiC1q	MKLHTVHIVGILVVLCFSNNAQGLTCLRCSDITEPRLCTKIERCQTGEVCAVQQYRADNGDIGYWTGCYPRQECAAVDNRTVVTSKRSQYIDGVVQCRDCCTSDICNAYGCGSPKYPDTRGPICFDCENVADPADCHTVTPCNLNQKCFIHEKTIFGKKYFTSKCESLMGCLPHFTGPVVGRKRDLPGVCLHCCDGDLCNADCSSAANVTVNPVQKPTVAPDHVAFHAIAYHSTVGKVVVFDHVLTNIGEGYDNTTGVFTVPTPGLYVFSWTIETYGRRTEAVLLVNGVQHALSRADQSSSYYDTTTSFVIRNLTLNDEVKVKVISGQAEARHTMFSGWKVNKTDDISFDVSLSREVSGTIIHFNNKTLDSENAYSVISGKFVAPRSGLYVFMMSANTY…
LOC111130449	smultiC1q	MNGAKFVDLFVDILLLLVILFSYVDVAQGLTCLRCSDITEPRLCTKIERCQDGEVCAVQQYRADNGDIGYWTGCYPRQECATVDNRTVVTSKRSQYIDGVVQCRDCCTSDICNAYGCGSPKYPDARGPICFDCENMSNPADCHTIVPCNLNQKCFIHEKTIFGKKYFTSKCESLMGCLPHFTGPVVGRKRDLPGVCLHCCDGDLCNADCSSAANATVNPVQKPTVMPDHVAFHAIAYTSTVGKVIVFDHVLTNIGEGYDNTTGVFTVPSPGLYVFSWTIETYGRRTEAVLLVNGVQHALSRADQSSSYYDTTTSFAIRNLTLNDEVKVKVISGQAEARHTMFSGWKINKTDSVAFNAILSSQMSSGSVIHFDNITLDTDNAYSTTTGEFVVPRSGLYVF…
LOC111131022	sC1q-like type 2	MSVVLIYVALVVSMIVSGASSGYVETTNLSSDAILRKQGEEIETLKRQVSQLSQLIGQCDCQANRQDIENRDRRLNQANQVAFYTYLSHNLQNLGNHHPIVFDHVHINEGNAYSSVDGELIAPVPGLYVFSWTIASADRTCMETELMKNQEIIGHLISDACEHDDWAYSSGTAVTRLGIGDRVYVRTATTHTHNVFGTGLGTSSFTGFLLH*
LOC111131011	sC1q-like type 2	MSVVLIYVALVVSMIVSGASSGYVETTNLSSDAILRKQGEEIETLKRQVSQLSQLIGQCDCQANRQDIENRDRRLNQANQVAFYTYLSHNLQNLGNYHPIVFDHVHINEGNAYSSVDGELIAPVPGLYVFSWTIASADRTCMETELMKNQEIIGHLISDACEHDDWAYSSGTAVTRLGVGDRVYVRTAVTHTHNVFGTGLGTSSFTGFLLH*
LOC111131134	sC1q-like type 2	MTVSPVRAFLVLLCVYGVRCTNPVRAEIDQLKLLYQQMDAKLQEVAAENQRLKETVTRASHHANYSTIAFTARLSVDTELAAIETLKFDDLLLNLGSAYDPATGLFTARESGVYQLAVSLMSGGKEGYFVMSRNGNDGLSYLYTHSGIWYSSSSVLVVQLNAGDTVQVKSLYSPANLHQGKYSVFSGFLIK*
LOC111131576	sghC1q	MKICLTFSIFVVYLFSCYGALNVTEELMFLKETVLLQKERIDGLQQTVGDILQRNEQSVPSDTPQLADITQREDDVVMEKSNIIKRLVPPTQSPQLQTTVAFFAYLSNTQLTSPHQVLIFDHTPLNAGNGYHPNSGIFIAPKTGVYVFIWTIRMFKQSIIDLIVNGSIYVSIYNRSYDDPSGAVGADESVTGYAIVSVNQGDDVYLRTHSAHGDNARNMFSNEFGRSTFGGWILH*
LOC111130910	sghC1q	MKVFLIFSIFVVYFVSCYGALNVTEELMFLKETVLLQKERIDGLQQTVGDILQRNEQNVPSDTPQLADITQREDDVLVEKSNIIKRLVPPTQSPLLQTTVAFFAYLSNTQLISPHQVLIFDHTPLNAGNGYHPNSGIFIAPKTGVYVFIWTIRMFKQSIIDLIVNGSIYVSIYNRSYDDPSGAVGADESVTGYAIVSVNQGDDVYLRTHSVHGDNARNMFSNDFGRSTFGGWILH*
LOC111131192	sC1q-like type 2	MVLLIFIFVLVQPVLGFLVTESCGDSVDCKLNSLIQITARQQHVLDQQSQKIAALENQLSAMTCRPQNAVSDHVQEETTSKESEMPTMDACKSNGLKLGPDTTIPSFYAIKSRDQRDLAKGGRIMFETAVTNVYKAYDVFSGVFKVPLKGTYGFMWNIAMNNIENHACFSLFVNDQVVGQTYLWNNGSDAMSTGFSIVEVNSGDDVFMSVCNVSQPLGEITSDIYRRTSFAGWCIACAG*
LOC111131263	sC1q-like type 2	MFLRFFVTVALVETVLGLLQGNNHPATTSTPDGTVLHQTLGLLVVELDKRVNDLQNKVAAMETERHQYVEKNQLETALSTERLEVEALRQILQGQNASLSTILLENALQLNATSQLNSTLSSLITDHENLQSDVDHMKISDISISLIKKDVYHMEEQIRGILSHNQFLSGNLSQVQNALHNLHDHVYRDKPGFTAYLDGDFHDDGAIILPNAYSNIGSLYDPTTGVFTADQPGEYAFYMGLECHGSGLKVVDLVKDGSKIAHGACFPKDDGYDYGSTFTVQRLDKGSRVWIKDSRQDTVVVKGKTTLSGFRL*
LOC111128903	cC1q-like type 2	MSSYRTELNSLRADFRDLQTELSKMKMTNAELKQQNSLLNNTLTGLNSKTNNLEKEIRHNISLLKSDLVTIDKSANVSVMYLQIEYQVLEKRLEATLKNVSIDIDFLKRDFDNGTKSHNCCSSLQSMFGNFSLQDLNSKVNGIQSTVDKTKNSVNLLVAQSKKIAFSATGTRGNQFQLGGIVFPSVIINIGGAYNASTGVFTVPTDGVYIFDLTDLSTSNSTESTPFMVSKRMGGCRKDDFSVGKLFDCQVILSLKARTSQAKDFYDGPFHCSSTKFSGWKL*
LOC111128904	sC1q-like type 2	MSGRMIDLLFCMVLIGATSFHFTEAVDDQMLTFLLNEMSNYRTSSMVMENDIKQLKAALTNLTSQNAQLQQLVTSLNSKCNACEQNLMNNVSKLNTDIQVVAKATNISVLFIDRERAVFEDRIEKLLLNHTKIFKAQIENLTHHVVFSVFGSPGNQIQFNGVVFKNTSVNSPANYDAKTGKYTIPEDGLYTLRITDGITPGLNNNSPFVVDGVRQKGCFGIARPEGAFSVCQIQLYLHSGQQVWVQDFNDFIHTNTTVFSGWKM*

## Sheet: Chr5
Gene	Type	Protein Sequence
LOC111137604	smultiC1q	MIFFTIVYLFGLTAKFYIAVEGLGLKCLRCDDVTYPQLCMNLEYCSGGDVCSVQRYRKDNGDVRFWLGCLPATHCAKTPNKTVLHSNKRAIHGSVVCNDCCYGDLCNVEGCGSPAFPTTRGPVCFNCPHTLNPTDCHHVTVCGTNELCYIGERPLFGQRYFTSHCEDIHVCNNHISEPIVFGKKRSGLNARSYTPCAGCCHGDLCNINCNASFTSGTVVNTGHGTTTKPNGQEMPGNYAFYVHQGTTFNGFLVFHNITTNEGSSYNASTGEFTCKFSGAYVFSWTTVTEYGRQGDLDLHVNDDVVGTSHTDSVGGLKNKDSSTGLVVVNLQVGDIVRLRLVNGTLNAEYTTFAGWRLDQNVSFHARVRTAQLRPNSSHEGLVFQDVVTNNGQPYLSGNG…
LOC111132928	sC1q-like type 2	MLSYLFLAILFVARTTSLSFVSDDKAQPTGPDGQTTRSEDAQSDILRQLLNQETLIRMALDRKVSDLVNDMADLKKYVQTSTKQLQDSKREIETNNKQLQDAKREIETNNKQLQDAKREIETNNKQLQDAKREIETNNQQLQDTKAEIVSLRNEVLSLKNQNRKSKADALKFQEKINVRFVRTDENITQVVNSQEQLNTNLNERFVTFQINTSYNIVDIQTKMDVLNMSLLDLKKQTTKLNTSLPEVIDKNLADASDNWNRSLSELNNRFVYTWSKLNNDHANKMAQLSDGINTSINVVKAEVNQSQKAQLELSSAISSVVLSLEVIRRNMSLLNGLAKDTPEAFTAGMTSSSNTWQGDILVFPHVITNKGQGYSSSSGKFTAPRDGTYVFTVTVMSYY…
LOC111137974	sC1q-like type 2	MTLFGLLSVWVLVFGIVHSEMPLESDVDVKNLLQRLVVLEESLEVERQRNDELEKTVNILTRNLEQTKRTFEDKCEALEKQLQNHREERTKISAKNVAEKTQRRRTYKNNWQRKPVVDWWTPLDSSSKSKNRDSDALSIQRRDSTNLKKRLLVQPSQVPPTPVAFYAQRSTNIPENEVTANLVIVFDVVKTNAGNGYHPSTGVFIVPESGIYVFSWSFRNSDNHSHSFQLMVNNNEEGLIYSRTAGSSISTTGVAVLHANKGDDVYIRVSSLRHTGTIYSDVLGRCVFTGWKLA*
LOC111137435	sghC1q	MLALLLISAMLFGCTDGWHAGSRSRFIDPIYPGPPVAFTAVLSRNTHVSGHAVVKYDSVLTNVGRAYSPSTGIFTVPHKGIYTISCSLLGDASNSVLLEIKKNGRKMAKVYSASGTHPHSAQILQLLLNEGDEIWIQNSSEQTAKFHDHGSYNTFSAALIARL*
LOC111132536	sC1q-like type 2	MPILIYAICPLFGFCTRRGLFGEASESLLQFLLKRTQEQDSKIAALEAKMMKDHSELSDRISFLESKVRNSESARRKIANLYLLLMENRQKTESKKVNLVEEENQNVATDDVRSLKSVQRRILSGRGLFVAFYALMSRSEPTPGQHHTMVFDTEVTNVGSAYNKHDGVFTAPTNGIYVFNWNLYSSYHGDVVSELMVNSNSKGGRRSDSTTVNEDHSSSGCVVVALNHGDIVFIRTHLTSQQNGQIISKPGTYEYSFSGWLLY*
LOC111137991	sC1q-like type 2	MAVAILCISILLFVGCLGDKRYKNQLESRLSQAEKDIEKLRAGLALLQQQNRALLEGLTTRTEKRLLSPTSAHQQYVTFTAKLQKAYTSLNDRETIIFDTIVTNSGQGYDENTGIFFCPVSGFYQFAATLVSESGTDKNLDAELMHNGHQIVRLHATVYGFDGGSQVVNIHCRQGERVWIRHMMGAGDSAQMPAGYSTFSGALLSVDN*
LOC111132634	cC1q-like type 2	MNALNERADINNQELNSCNNTHETNFNKPKQVLAIVNKSSATTCNERIDDLEGIVRSLKEKLENEIGVKQKVENLEVALVVSNRRIEELEAKVSELTFFEQSTKTKPLATATNNINGIKADNGLVHAKLKTRSKIKYPLWGENKTPAGIQKGFVQSNHSKKENHKIYTHATAAGGQPKMIGAEKDKLRKKEISSGNTSIHSTRAVSDGAAFFAYVSATETIISEDHTIKFDKTVTNFGNHYNAFSGIFTASQHGVYVFTWNLYCGGNGGFIYSQLVVNSDVVGAMVTDARGTDYARTTTGVVVVEINNGDIVFVRIHPTNLHNFNLFSHTDFRSTFSGWKLY*
LOC111136902	sC1q-like type 2	MLLFGFLSIWVLLFGIVHSERPLKDGLLSDIDVKNLLQRLVVLEESLEVERQRNNKLEKTVNILTTNLEQTKRTFEEKCAALEKQLQNHLEERTMMSSSKNIEEKTEKWRTFKNNWQRKPVVHSWTPLDSSSKSKNRDSDALSIQRRDSTNLKKRLLVQPSQVPPSTVAFYAQRSTNIPASEVTSNHVLVYDIVTTNVGNGYHAPTGVFIVPESGIYVFSWSFRNGDHSQHSTQLMLNNNDVGLIHARISDGSISTTGLAVLHVNKGDDVYVKIPSVNHVGTIYNDVYGRASFSGWKLN*
LOC111134040	sC1q-like type 2	MTPFGLFGVWVLVFGIVQSKISLADRLLSDVDVKNLLQRLAVLEESLKVEKERNDKLEKTVNVLATNFEQTKRMFEEKCTGHLGGLHAHKDEGIKLDLSDVSENIAMNAHRRKTRISKKNHSVEESGILKREYPSNPEKRLLVQPSQTTTTTVAFYAQRSSNIPASEVTSNLVLVFDVVKTNAGNGYHPSSGVFIVPESGMYVFSWSFMTGDNLDDSTQLMVNSNEEGIIHIHPAAGGWITGTGVAVLHVNKGDDVYVRISSLSHYGEVFSQANGRSSFTGWKLN*
LOC111132509	sC1q-like type 2	MTLFGLLSVWFLMFGFVQSKLSLEDGLLSKADVKNLFQRLDALEESLEVEKQRNNELENTVNILKSNLENTKQTFEDKYAALEKQFLKRLDEERKSCKRVAEKTQKKKTYQNDWQRKLTTDSSVLSKHQRNHKFQREQKRLLVQPSQVPPMTVAFYAQMSTSIPEPEATGNHVMVFDIVRTNDGNGYHPSTGVFIVPESGIYVFSWSFRNADNHYHSTQLMVNSNEGGEIQVRTANASSITGTGIAVLHVNKGDDVYVKIATVGHLGPIFSDNFGRSSFTGWKLN*
LOC111132510	sC1q-like type 2	MQLFVLGLFGVWLLAFRIVHSELPPGSVFESEVDVKNLMERLIVLEESLKEEKQRNDHLKRTVSSLVTELEQTKRSFEDKYLALQMQLQEHLDFKTEDLSHTPKNIANETQKRIIPDDKQRKRGVGWLKPEKSALTNQDSIKPPGVVRREHSAKLQRRLLLESIPVTPSTVAFFAQLSSNIPLAEATGNHVMVFDLVKTNAGNGYHPSTGVFIVPESGYYVFSWSFRNSDGHYHSTELMVNNSVESVIHLHTGAGSWLSGTGVAVLHVNKGDDVYVRISALSHYGDIHSDNYGRSSFTGWKLN*
LOC111132059	other/uncertain	MLQQDVIITLSVCAVIATTVFFEHRMQQVEDKCSRIKSKFDSSSDRPEQTEEVDDRNKADTEDTENGRIEATIKRSPSNDLMEDELKELSARRAVAFSVTIGHALTDNETVSEIVIYDIVEINIGDGYDPTTGIFNVPETGVYAFQWTSVTIPGKWYESELNINGHQKRLNSCNNKGDTASSNLSCTSMVITAVKRGDIVWIAKFGQDGDYLMEMYSSFSGWKIGELSESDSLFI*
LOC111138413	sC1q-like type 2	MTPIKVLLVLAWLLVTLTARGQCEVSVEEVYQEVLELREVIRQLTSTVAAQNTRIGQLQRAIVRQRINCRACVSNEGTGFKGFNGNTAINALNEPTTTKNETDVASGYRPETRPTEHHPTVEKFQPHTFGSSLVRKGRLLIPQPTQHVVPPHSTTAFYAYLSADLSHTGQGQIIKFDVVKTNAGNGYHPFSGTFIAPETGYYAFSWTSRIKHYGSTGEDHALELVINRDVYGSIYMKSLTGEDGQATGLAIAHVNQGDDVYIQTHHHDPGSGDIRSDVYGRSSFAGWRLY*
LOC111132370	other/uncertain	MNNGFILALLFGLRFGSSIGDEDEKDQYENDKRFLFETTTSHFADRNLAAMEAAIKDLGTRVQQLETENQLEENLVNRLNRDLLAAQSELNATLYRQRELTGKVDQILPFGGIRLIDALGRMSTVRGRVEVYYNNTWGTVCDDAFDTLDAKVVCRMLGWENSSATVHERAYYGQGNDPVLLDDLACTGQEKVLWDCKNPGWYKQNCEHSEDVGVDCSPSSTDIKYAFHAEATSSYTISGIRANQTLAFRHIVLNEGGQYIYVSSGGYFSCHLPGTYVFHLGLKPSGSVPLKAYIFLYNTQQKLAVVDTSDGHGSTRFASNVAIVKLTYGQVVGVRVDSTQANGTRLDNEMCYFSGFLLHPN*
LOC111136767	sC1q-like type 2	MLNMCKWKFLVLFLGLIFGHVHVEAVHDAFRDELNDLRKIVQENTEIIRLLTEKLTTQNGQIQNLETKLAKSEEERITLTERIEVLESFAVRGGQKSTEAETPTDHLNAASKIDAGTDIEESETYKSVIRRAATNVIAFYAYMGQTEVHPGPHHTIIFDVPVTNIGNGYNHFSGIFSVPSSGVYVFSWTIGDSSGGTIFTELVVNKDVVGGILTQSMYTADRFTTTGLVVKEVSESDVVFVRTSSTGGNHGDIQSLSPVQRTSFSGWRLA*
LOC111132508	other/uncertain	MSSNIPLGEATGNLVIVFDVVKTNAGNDHPSTGVFIVPESGIYVFSWTLRNGENNFHSTELVVSNSVESIIQLHSAAGIWISGTGVAVLHVNKGDGVCVRISAVGHYGDIHSDNFGKSSFTGWKLN*
LOC111133440	sC1q-like type 2	MEGFKLFNISVLGTIFLQLLSIEDTIAFKDLRTDDTFSNLETNEEETRGGRRRPVDSKDSWLQFIRRGSPKPPPKNKKRKQKQRLQRLGCPAGPVGPQGPPGPPGPKGAKVTIQELMTEFLDIVKEAAEKQAEKMVIERCGVCAMAMNNSGAEVSFYAADVMALPRITSGFHLRLKKNVIVDGKTFIELHSFHQPFAAGSFQRGNAFNIKNGRFTAPKTGIYQFSANLHIRVKRKGRRTKLKRKDAIKSQICINSLCNKFVSLTHVVGIESNSKTFTVSFSGFMELEQSQYVSIHIDNSSKMNIAVQKNSEFTGIMMGT*

## Sheet: Chr6
Gene	Type	Protein Sequence
LOC111101627	other/uncertain	MSLLNGPVKDTPIAFTAGMTSASSSWEGDILVFPHVITNKGHGYSSSSGKFTAPRDGTYVFTVTGVSSYSKFLCLDIVHDGLRKVRTYSSDSARYQTGTNLVVLELDRGDAVWVKRFMGQGYHTNSVPMTTFSGFIL*
LOC111101555	other/uncertain	MYTYMCIVKQSNSVYGLRFIDACINKCINCILLFAVKDTPIAFTAGMTSASSSWEGDILVFPHVITNKGHGYSSSSGKFTAPRDGTYVFTVTGVSSYSKFLCLDIVHDGLRKVRTYSSDSARYQTGTKLVVLELDRGDAVWVKRFMGQGYHTNSVPMTTFSGFIL*
LOC111101622	sC1q-like type 2	MWSRFVLGFLLAITTLIPESDGETVKTPLKSKADIFRLLLNQETLIRSALEKKVFGLVNDVQELKEIMVNNKKEIVYLKNENQELKAKTIKQLRDAKIKMTTLKKENQDLQAETNKQLKIAEEESVALRNEIQALKAKFQSQANVTKLLAADVEESKKTHRNLSSAVLSLESFQKNISLLRSFVKDTPVAFTAGITSDSTSWQGDILVFPHVITNKGQGYSSGSGKFTAPRDGTYVFTVTAVSFSSNSLSLDIVHNSVSKVRTASSSSALYQTGTNLVVLELDRGDAVWVKYYSGQGYYSRSVPITTFSGFLL*
LOC111101434	sC1q-like type 2	MLSYLVFGFLFVVQTIITDTDGEALKAPLKSKEDIFRVLLNQETLIRSALEKKVIGLIDDMVNMKENMVYNKKEIVYLKIENQELKGKTNKHLQNAKKEIAALKKKNQDAKKESVALKNEIRALKANFQDQANETKLLSADVEVSKKTQIKLSSAVSSLESFRNNVSLLRSLVKEKEVGFTVGMTSSSSSWTGDILVFSYVITNTGQDYSTKTGKFTAPRGGTYVFYVTVVTNAKYFIRLDIVHNGFSKVRTESHAYDIYQTASNLAVLKLDKGDTVWVRRSGGQGYHTDNVPYTTFSGFIL*
LOC111099797	sC1q-like type 2	MLSYLFLAILFVARTHSLSSVTDDKAQPTGPDGQTTTCRCRSEDAQSDILRQLLNQETLIRMALDRKVSDLVNDMADMKKYVQTSTKQPRTPKEIDTNNQQLQDGKREIETNKQQLQDAKREIETNKQQLQDAKREIETNNQQLQDAKAEIVSLRNEVLLLKNENRKSKADALEFQEKINVRFVTAEENITQVVNSQEQFNTNLNERFEAFQTSTSYNIVDIQTKMDVLNMSLMDLKNQTTKLNTSLPEAIDKKLTDVSAHWNRSLSELNHRFVYTWSKLDNDHANKMAQLSDGINTSINVVKAEVNQSQKAQLELSSAVSSVVSSLEAIRQNMSLLNGPAKDTPVSFTAGMTTYSYTWEGDILVFPHVITNKGQGYSSSSGKFTAPKDGTYVFTLTVV…
LOC111101730	sC1q-like type 2	MAPFVKFLLLFAVNQIIGVNSNAISLDKRANFAKRADKNTLYNIYTKINTLEKALKNQETRNQKRTKLLREVLKSFVGIDSNLESSQKVAFTATVTRGTISKNGQTLVFPNIITNVGGGYNRANGVFTAPRDGVYVFFCRITAATNPSDMYFDFILNGSRKAGSLVYGRNNNPYRTSSNSIVLQLRHGDRVWVKMTYGGNHYYYGVGGDQSFSGYLL*
LOC111101200	sC1q-like type 2	MLVRISLLIFIFVRANALSSLLTDGDNKTSNTLENKDHAWNDVDFLRHMINQETVIRLALVKNVQALVGDVIQMKKSITTSELTISSLQQTVGNLNRRVDSLEQENKELKNSSVVLQDRVLNLEARLNDMNNNVSSLNENLEDSRKENDEKRQQILNKTNVVLDDIKMEVRYLSVTLFDFKDHTETSDKIRDSNRKTIESRFNSSIEVLQTGNQETKSDVDAIKASIRKLEEAQTNFRENIADNLNSTKSEFESELKKSEYERLKLSASVSSLETFRLNMSKSKCESSEIVAFTAIVTQDMTSQNGQTLVFPHIISNVGGGYNGNTGVFTAPRDGVYVFFCKITGQDNPRDMVFDIILNGSAQTQHLVYGRSANPYRTSSNSIVLQLTHGDRVWINMYW…
LOC111099937	sC1q-like type 2	MMLVRISLLIFIFVRANALSSLLTDGDNKTSTTLENKDHAWNDVDFLRQMINQETVIRLALVKNVQTLVGDVIQMKKSITTSELTISSLQQTVGNLNRRVDSLEQENKQLKNSSVVLQDRVLNLEARLNDMNNNVSSLNENLEDSRKENDEKRQQILNKTNVVLDDIKMEVRYLSVTLFDFKDHTETSDKIRDSKRKEVESRFNSSIQGLQTENQETKSDVDAIKASIRKLEEAQTNFRENIADNLNSTKSEFESELKKSEYERLKLSASVSSLETFKLNMSKSKCESSETVAFTAIVTQDMTSQSGQTLVFPHIITNVGGGYNGNTGVFTTPRDGVYVFFCKITSHVNSSDMYFEFTLNGSAKTRNLVLGRSANPYRTSSNSIVLQLTHGDRVWINMV…
LOC111099954	sC1q-like type 2	MMLVRISLLIFMLVRANAFSSFLTDGDNKTSTTLENKDHAWNDVDFLRQMINQETVIRLALVKNVQTLVGDVIQMKKSITTSELTISALQRTVENLNLRVDSLEQENKQLKNSSVVLQDRVLNLEARLNDMNNNVSSLNKNLEDSRKKNDEKRQQILNKTNVVLDDIKMEVRYLSVTLFDFKDHTETSDKIRDSKRKEVESRFNSSIQGLQTENQETKSDVDAIKASIRKLEEAQTNFRENIADNLNSTRSEFESELKKSEYERLKLSASVSSLETFRLNMSKSKCESSEKVAFTATVTQEMTSQNGQTLVFPHIITNVGGGYNGNTGVFTAPRDGVYVFFCRITGRDNPSNMRFEFFLNGSAKTRNLVYGRSANPYRTSSNSIVLQLTHGDRVWIKMY…
LOC111100109	sC1q-like type 2	MWSGLFLGFLFVVQTKSLSVLTDDRPQTSGPDGESAKTDILRQLLNQETIIRMALDKKVYDLDKDFIEMKENMAEMKNNNVNNNKQLQDAKREIEINKQQLQDAKREIETNNQQLQDAKAEIAVPKDEIGSLRTKFNASNLNAFKFQKEVEIKFEATEENITQLLYDQEWYGRKLSNDVEIFKTNTTNDLADIRRDVRSLFSSMLILENQTTKLNTSLPEAIDKKLTDVSANWNRSLSELNHRFVYTWSKMDNDHANKMAHISDGINDTINTMKTEVNQSQKAQLELSSAVSAVVSSLEVIRRNMSLLNGPAKDTPVAFTAGMTSESSSWVGDILVFPHVITNKGQGYSSSSGKFTAPRDGTYVFTVTAVSYSSDNLELDIVHDGVRKVRTWSSSFTSY…
LOC111099707	sghC1q	MTPFVKFILLFAVNLIIGVNSNAISLDKRANFANRADKNTLYNIYTKINSLVKALKNQESRNQKRTKLLRDVLKSVIGIDSNLESSEKVAFTATVTQHIASKNGQTLVFPHIITNVGGGYNRTNGVFTAPRDGVYVFFCKLTAGINSGDMYYDFILNGSVKARNLLYGRKTNPYRNSSNSIVLQLSHGDRVWIKMYEGRSHWSTSAGGYQTFSGYLL*
LOC111099708	sC1q-like type 2	MTPFVKILLFFAVNLVIEVNSNAISIDKRANFAKRADKNTLYNIYTKINSLEKALKNQESRNQKRTKLLRGVLKSVIGIDSNLESSDKVAFTTTFTKYMTSKTGQTLVFPHIITNVGGGYNKTNGVFTAPRAGVYVFFCRITAAINAGDLYFEFILNGSAKTTNLVYGRSANRYRISSNSIVLQLRHGDRVWIKMSVGGNHWNSGVGGDQTFSGYLL*
LOC111102065	other/uncertain	MTEYLRMINSRYRFGSVPGLANNLNSTKSEFESELKKSEYERLKLSASVSSLETFRLNMSKSKSSEIVAFTAIVKQEMTSQSGQTLVFPHIITNVGGGYNGNTGVFTAPRDGVYVFFCKITGRDNSIDMRFEFILNSSERTHSLVYGRSAIPYRTSSNSIVLQLTHGDRVWIKMYRGGKHFATGAGGDQSFSGYLL*
LOC111102063	sC1q-like type 2	MHTLTYILFLLNFAFSNGLLFPKTTTPTTSTIPAATISQHNKEPHSDVILLNQIVMQESALRLKLEETVKQLMTDLENVKKQQSASDIQISTLIQAKADQDVLNRQLQENITSVRVENQNLMHELSTITGENEILKQELLTIKNSSVFTLGLHSCDCNIKNVTEELKDFKTNFRYMTLSLLDIQQKTDVMQDRIDDQLANLTNQDVAILTTVGNLERIRPKLENVMNETRDLKSDLLKIQHKQTEVETDILRLKTNVTESLEQVAFTATVTQMMTSKNGQTLVFPHIITNVGGGYNGNTGMFRAPRDGVYVFFCKITASVNQGDMRFEFILNGSAKTQNLVFGRSANPHRTSSNSIVLQLTHGDRVWIKMLYGGYQWGDGAGGDQSFSGYLL*
LOC111102308	sC1q-like type 2	MWLRLVLGYLLAITTLIPESDGETVQTSLKSKADIFRLLLNQETLIRSALEKKVFGLVNDVLVMKEIMINNKKEIVYLKNENQELKAETIRQLRDAKIKMATLKKENQDLQAETSKQLKIAEEESVALRNEIQALKAKFQSQANVTNLLAADVEESKKTHRNLSSAVLSLESFQKNISLLRSLVKGTPVAFTAGMTSYSSTWNGDILVFPHVITNKGEGYSSSSGKFTAPRDGTYVFTVTAVSFGSNHLRLDIVHDDVRKVRTYSSQYASFLTGTNLVVLELDRGDVVWVKRVSGQGYYTEAVPLTTFSGFLL*
LOC111102222	sC1q-like type 2	MHILRNLLFVLNIAFIRGLVFPTTTITPTTTPCNKVHNSDIMTLNQILRQETVLRVKLEETVRQLMAEFENMKKQQSAWDIQISTLIQAKADQDVLNRQLQENITSVRVENENLKQELFTIKNSSFFTSGLHSCDCNIKNVTQELTDFKTSFRYMTLSLLDIQQKTDEMQDRIDDQSRNLTKQDAAILTTAENLERIRPKVEKVRNETSDLKSDLLKIQHKQNEVETDILRLKTNVTKFSEKVAFTATVTQDMTSQSGQTLVFPHIITNVGGGYNGNTGVFTAQRDGVYVFFCKITGRDNSGDIRFEFILNGSAKTHNLVYGRSTHPYRTSSNSIVLQLTHGDRVWIKMSEGGKHYNYGAGGDQSFSGYLL*
LOC111100440	sC1q-like type 2	MKVCRIICLNLFFLILIVHASARTCEERLESLENAFQSLIENQMNVVTENVDPDPKVKGSDRCPNLEKESKLWKRKLEDLEKSLTESNRRIIELETRVSELEFSTQYMESRWSTENSRKKNLKENIKSNTDRVEYLQTQNTKQVMQRGPAQNKTSIKKRIGNIADGNLMISGEKQSTQRGKRLLTGIQLTTTPSTGGAAFSAYVSVHETDISKDHTIKFDTIVTNIGSNYNRHSGMFTAPEQGVYVFSWNLYCTAGGYFYSQLVVNSNVVGAIYTSDQGANNIRTTTGVVVVQVNAGDVVYVRTHPTNTHLYNLYSDPDWRSSFSGWKVY*
LOC111099961	sC1q-like type 2	MMLVRISLLIFIFVRANALSSLLTDGDNKTSNTLENKDHAWNDVDFLRQMINQETVIRLALVKNVQTLVGDVIQMKKSITTSELTISALQRTVENLNRRVDSLEQENKQLKNNSVVLQDRVLNLEARLNDMNNNVSSLNENLEDSRKENDEKRQQIHNKTNAVLDDIKMEVRYLSVTLFDFKDHTETSDKIRDSKIEEIESSFNSSIKVLQTGNQETKTDLNAIKASIRKLEEVQTNFRENIADNLNSTRSEFESELKKSEYERLKLSASVSSLETFRMNMSKSKCESSEKVAFTATVTQEMTSQHGQTLVFPHIITNVGGGYNENTGVFTAPRDGVYVFFCKITTPEISGGLRFDFILNGSAKTHHLVYGRSANPYRTSSNSIALQLRHGDRVWINMA…
LOC111099936	sC1q-like type 2	MWSGLFLGFLFVVQTKSLSVLTDDRPQTSGPDGESAKTDILRQLLNQETIIRMALDKKVYDLDKDFIEMKENMAEMKNNNVNNNKQLQDAKREIETNKQQLQDAKREIETNKQQLQDAKREIETNNQQLQDAKAEIAVLKDEIRSLRTKFNASNLNAFKFQKEVEIKFEATEENITQLLYDQERYGRKLSNDVEIFKTNTTNDLADIRRDVRSLFSSMLILENQTTKLNTSLLEAIDKKLTDVSAHWNRSLSELNHRFVYTWSKLDNDHANKMAQLSDGINDTINTMKTEVNQSQKSQLELSSAVSSIVSSLEVIRRNMSVLNGPVKDTPVAFTAGMTTYSSTWQGDILVFPHVINNKGQGYSSSSGKFTAPRDGTYVFTVTAVSFGSNYLSLDIVHDG…
LOC111102224	other/uncertain	MTSNSGQTLVFPHIITNVGGGYNEHNGVFTAKQAGLYVFFCRITAADNGFDIWFDFILNGSTKTHNLVYGRSTNPYRTSSNSIVLQLRHGDRVWVKMSVGGKHFNSGVGGDQTFSGYLL*
LOC111101597	sC1q-like type 2	MWLRFVLGFLLAITSHITESGGETAKTPLTSKVDIFRLLLNQETLIRSYLEKKVFGLVNDVQDMKEIMVKNKIEIIYLKNKNQHLEDRISRQLKNAKKEISALKKKNWEVKAESSKQLKHAEKESLALNKEIQTLKGNFQNQANETKRLSADVEESKKTQIKLLSAVSSLEILRNNVSSLRSLVKETTVAFTVGMPQSSGSWGGGILVFPYVITNTGHGYNPTTGKFTAPGRGNYVFFVTAVSFRRNDLYLDIVHDGVSKVRTMSYSSAWQTGTNLAVLELDKGDHVWVGHHYGKGYASGSVSYTTFSGFLL*
LOC111100452	other/uncertain	MSLNSSVDIKSNLFRLLLNQESLIRLALERKVHNLGLDVREIKTNMATNNKRLQDNIEVLEKQVNLLSSENQVLRADQSNLTDLLSGIQSTTTPSTGGAAFSAYVSVHETDISKDHTIKFDTIVTNIGNHYNQHSGMFTAPEQGVYVFSWNLYCELGGYIFSQLVVNSNIVGAMFSSAAGASDIRATTGIVVVQVNAGDVVYVRTHPKNSYKGNLRSNPDYRSSLSGWKLY*
LOC111102223	other/uncertain	MTSKSGQTLVFPHIITNVGGGYNGRTGVFTTPRDGVYVFFCKITIPANSDGMRFEFILNGSAKTHHLVYGNSTNPYGTSSNSIVLKLTHGDRVWIKMWYGGKHYGYGAGGDQTFSGYLL*
LOC111101952	sC1q-like type 2	MKVCRITCLNLFVLILIVHVSARTCEERLESLENAVQSLIENQRNVGTENINPDPMVKGSDRCPNLGKEGKLWKRKFEDMEKSLTESNRRIHELETRVSELEFSTQYMESRLSTDNGMEKNLKENVKSETNSVEYVWKESTTPVIQSWSVQNNTTEKEENSGNVVTSDEKHSKRFVPGIKATRTQYTSGAAFSAYVSTYETELSKDHIIRFDTIVTNIGTHYNQHSGMFTTPEQGVYVFSWNLYCHSGGYIFSQLVVNSNVVGALFTSGEGATDIRSTTGVVVVLVNAGDVVYVRTHPTQSHSGNLYSHPDWRSSFSGWKVY*
LOC111101694	sC1q-like type 2	MIGFYILFVSSFNWLNSIAAVDTNGPSNSDRKLGQGVSVLRSLQYDVSMLKSQHAITLSHLSLTLSREADLQNKIVVMQNDIKTEKAFRLNVERELGHLKYSSCCKNLQRDLWKEIAQIKRDLSAKRVVSVSNIKNTMTTNSVPKNPRKVYFSSTVNKDINKRWTSREKIIFTKVLTNIGAGYNATTGIFTAPHNGGYLFLCFLASHSNEIKASVVVNGTPKVGVPAIARSGPNGYGAAGNAVILQLAKDDRVWIEHISGEYLWSHPTFPYSTFSGYLVE*
LOC111101950	sC1q-like type 2	MKVCRIICLNLFFLILIVHVFARTCEERLESLENAVQSLIENQRNVVTENVDPDPLFKGSDRFPNLRKERNLWKRKLEDLEKSLKESNRRIYELETRVSELEHSTQFMESRSSTDNGMKKNLKEHIKSETDSVEYLPKESSTPVIQSGSVQNNTNNTEEKSGNVVTSDVKHSKRFLPGIKATRTQSTGGAAFSAYVSTYETELSKDHIIKFDTVVSNSGSHYNRQLGLFIVPEQGVYGFSWNLYCQGGGYIYSHLMVNSNVVGATYSSGDGANGIRTTTGVVVVQVNAGDMVYVRTHPTNGHYNLFSNPDWRSSFSGWKVF*
LOC111101284	sC1q-like type 2	MFPAGLGILFCSLICVVFGIQNGNGEDFNQICSENIRVLQRELDILRQELKYQGEEIKRLKQEGYPNSGHTRNSMKAERSSVKTDHTHDEVFQTDSNGLSHDVNSYPEKIFRQGRLLMPLNSSSPDNSPRIAFYANTVKDNVDLGVHHTLIFGNDVTNEGNFYHHATGNFIPNVSGVYVFHVQILLCSPGHELRTELVVEGVVKAAHYTGDTNNCSNGGGMAILHVNAGDSVWVRVRSSDGANNVAWESSFAGFLLYPQQ*
LOC111101939	sghC1q	MAVATVNILLTLRAFHLAVNTGINNVANYTAPVNCFIYDRKNFYTNDPSLSLVNKNERCTVKCPRFRNVTLTYNIKPVYPWSQEVNYNVLCTGCDPDLAGIKNQIQLQVIHCMGGDYDNRFYEIEAATEDGRKGYSTVFVEAEFKECFTGRLSAAAGPGHIKFDNVEINEGLSYNNVTGVFTAKRNGFYNFYLTARTRTSRYTKMELRRNGVVAGSITNDVLVEHGWEVEDGATAILLDLTKGDQITVYANGTLQDGSTMSCFSLRTLMEEPPVVFYATVPEGKMVDADMFEFLVYDNVHIDTAQRFMDNTNYSIPSDGLYVISVTTSFHEEAIHGSYVDFRFKSLRYSQLKIPARTSNSFTFIMRYNESDLIGNKLFSLYEASLSNETSIAVFKYFNL…
LOC111102215	sC1q-like type 2	MNTRMWSYIATVFISASYKCIVNGQTTIPDHLLSENMESSILRFLLDEVNNLKSDLITIRMNLIEEKEQRLLLEREVNALKNVSCCNNKHTNEILQSSLQIVKNTLTFELDLELKQQRNDTMDEISKLRKEFNAIMEATTTTVAGGFATAPEIKTKIYFTAATSIDINKVWMANEIIIFAHVISSEGGGYNPSTGIFTAPQYGVYVFMCHLASINYGYMAKLLVNGVPKLGVALPIDQGTVIANTKTYSAAGNTVFLPLQQGDRVWMAHYEYSILGSIWTHVYFPYSTFSGYLWN*
LOC111101461	sC1q-like type 2	MIFSGKCMLFLCSLICMTSGFLKVKGANLNDACYEDIQTLRQELNILRQQLKLQEEEIKKLREVLPRKTNHRRDDFKREVLSSKASRGQFASFLAQEMAPRSFKRDQLLTEIKSLRTDIRVPHNVTSRQKRKFTRQDKTPHIAFFADRVSHGGNLGLHQTLVFGHVLTNVGNFYNRFTGIFTPNVTGLYVFHVQILTCHMGQDFRTELVVEGVVRSSHFTGDSTHCSNGGGMAIVHVNAWDSVWVRVRTPGEYNSIAAESSFAGFLLYAS*
LOC111100124	sC1q-like type 2	MAIPSTSKCVLVLCLLNYTVSLVASDERKDAPNDACSEDIRALRQELQKLRQELRIQGKRIDRFEKELATTSHHSRDSRSPKKNHFSTKSVEYKDEIHLKHNVSRNYENYTNSSKRTMLPRQTKSTFNNVNTKLHRITRWKRDNTQRISFYANTVKDSINLDVHHTLIFGNVVTNDGNCYRPSSGHFRPNISGVYVFDVQIVQCYPRHILRTELVVEGVVKAGHYTGDSTHCSNGGGMAIVHVNAWDSVWVRVQTSDGVNRVAWESSFSGFLLYPRK*
LOC111101482	sC1q-like type 2	MVVSVSSFQCRWPLLFGFFFVFCGCTERKSSPDLSTWKAEIEKQIHHLQKDSQETHLANQNLVTKVELLERKLMELELEKSKMEEIIEKQNERLRFVDSLSTTQKKMDNPEDPLMPHEQRTDENEYNRAQRLIGPTAQTAEPIVFHSYLSTNSLPNLSQHHVIIFDSNPVNKGHGYHKDNGIFEAPRAGTYVLVWTLYTYPRGLVRTELLVNGNAVGGALVDSHGDDGIQSSTGLVITDLGLGDHVYIRLSYAAFNYILSYQDARSTFSGWLLH*
LOC111101990	other/uncertain	MTLGIFKVKGANLNDACSEDVQTLRQELNILRQQLERQGEEINKLREELHRNKDNGRDAVKRDDLSSKAKRNPFAPLVAQEMAPRSSKRDQFSTEIEHLRTDIVRVPYNVSSRPKRGFRQDNTIHIAFFADRVTDGVDLGLHQTLVFENVLTNVSNFYNRITGIFIRNVTGFYVFHVQILTCHTGQDFRAELVVEGVVKNSHLTGDSTHCSNGGGTAIVHVNAGDSVWVRVRTPGDYNRIAAESSIVGFLFHAS*
LOC111101408	sC1q-like type 2	MLVGVHFVIVLTFWGSISCDLTLEDVYQEVLDLRHVVKDMQTKIQLQDEKIGELNGIIRKQQDLLRHSAAESKLGGFLGNYVHHKDIESKSTDEAGERGMDSSHIQKPPKRKHQIAETVLRNDDHQREGRLLTGPIPDETTSGIVAFYTYLSTVLAHTDLGQDHTIKFDVVKTNEGQGYHPGSGVFIAPETGFYVFVWTIRVGAYNASLEYHSTELLINNIVYGSVYALAFPDSSKDDSGTGTVVAHVNKGDDVYIRTHSAHHGKGGILSEGFGRSSFAGWKIN*
LOC111099456	sC1q-like type 2	MKLSFLVLAVLIVYSEGLLFNSNQTHRPSLEERMDLLENQLADERKQKYALQIELDEEKQKIAELERQADVQNDTDQKLLEVYNTVPKRFQDITTQIRGALLSISSLDNTHRLDIQKLTEGLNNVQTLLPNLTYNISEIQGHFQEKGNVLTHMIKAIQHNQTTSKEELTRLKTSLIGLSNKQGTLESTVNNMVVKQSNLQSKLTNSVIFLATPRKIRATLWNRFYVNPSATSNVLIKFPEVKINVGGGYDQTTGVFTCPSEGYYVFHWSVTSTSHEQPCFSAILKNGVEIIGNEIGGNLGAFHLNKNDRTWIKAKSNCSIVDDHSSFSGFKIL*
LOC111102062	other/uncertain	MSVTFEEESERGDEKEQENRGNNGKDYSEMVAFTATVTQAMTSQNGQTLVFPHIITNVGGGYNGSNGVFTAPRNGVYVLFCRITGINNSGDLFFEFTLNGSAKTRNLLLGGSAHPYRSSSNSIVLQLRHGDRDDDSNSVYNINENNNQKHNENNNNNNNPNNDNNDNIPSNDNIDDIPNNKYNTNKDDD*

## Sheet: Chr7
Gene	Type	Protein Sequence
LOC111102535	smultiC1q	MLFAFNFSAYRYASAESEEDLNSSPDWQFAIRKIKELENRIKIQDERIATLEKRPLDEEWKSVINLQKTVQKQNDRINQLEARIYELEGIGQDDNIESVQTKSPTNVSEPNNSTIQSDKKRLLLQPTTIPVESVAFFARFSSSTPAGINHHILVFDKVITNVGNAYHSHTGTFIAPRSGLYVFTWTIRLYGTFHHSTELLVNNNVVNVIYLHPAQTIDGSVTGTAVVHVNQGDDAFIRTGTVNGERLLVQPTTVPLESVAFYAYFSSNTPASIDHHILTFDTVITNVGNAYHPHMGTFIAPRSGLYVFTWTIRLYGNNYHSTELLVDNNIVNVIYFNPLDHIDGSVTGTAVIHVNQGDDVMVRTGSPNFGDIKSYPNGRSSFAGWSLM*
LOC111102419	sghC1q	MKKGIGFQLAVLLVALSYGYSSDIEAKSIFEKFRKDYSIITNTCKAFGFVQDTCIARDGQRKVVAFTAGTTASVSTWNSGALIFNRVISNIGNGYNLHTGVFTVPISGTYVFYVSAVEYKYQNLLLDIVLNSVSKVRMIGENGAPYQTGTNMVVLNLQKGDSVWVRHAHGKGYYSHNVPITTFSGFMI*
LOC111103848	other/uncertain	MNLVKNVHTMMKDMLTLQEKLAETEGKISRMKTTTDHEISELKKHVEFLKVENAALKNKTAVEEKEIMLLKENLENVSNTLNDMKVEVRYLSITVFGMNDDFKEIDVRFQELENSTKEIENEVRVNDKSNAATISDMEKRHLTLIDDLKNTTSSLQADIGEYETNQLKISATISSLELFRINQTLSKCDPKQKVAFTAGVTSVSTTWNSGTLIFNSVILNVGNGYNPSTGVFTSPVAGTYVFYVTAVEYIKQYLMVDIVLNSLSKVRTIGESNASYQTGTNMVVLNLQKGDSVWVRHASGKGYYTNFVPITTFTGLLVG*
LOC111103840	sC1q-like type 2	MRDIVLVGLLFIAGVQSESVSKLTDEVSQNSTYHNLNDILSVKNVDVFRQLLNQETLIRINLVKNVHALMKDMLTLQEKLAETEDKISRITTTTDHEILELKKQVKFLKVENAALKNKTAVDEKEIMILKENLENVSNKLTDVKVEVRYLSITFFGMNDNLKEIDERFQELENSTKEIENEMRVNVKSNAASLSDLEKRHLTFIDDLKNTTSSLQADIGEYEINQLKISATISSLELFRINQTLSKCDPKQKVAFTAGVTSDSTTWNSGTLIFNSVILNVGNGYNPSTGVFTSPVAGTYVFYVTAVESIKQDLRVDIVLNSVSKVRTIGFHDAAFQTGTNMVVLNLKKGDSVWVRHYFGKGFYTDSVPITTFTGFLVGEIL*
LOC111103845	sC1q-like type 2	MKDIVLVGLVFIAGVQSAAVSILTDEVSQNSTHPNLNEISSKNVDVFRQLLNQETIIRMNLVKNVHILMNDMLTLKEKLADSEDKISGITTATVQEISDLKKQVELLKVENADLKNKSNADKTEIMLLKEKLVNVSNTLTDIKVEVRYLSITVFGMNDDFTKIDEKFQELENSTKEIETELRVNVKRNEATLSELETSHLTLIDDLKNTTSSLQADIGNYETNQLKISATISSLELFRINQTLSKCDPKQKVAFTAGVTSASSTWNSGTLIFNKAILNVGTGYNPSTGVFTSPVAGTYVFYVSALEYSKQYLQVDIVLNSVSKVKLVGDSEAAFQTGTNMVVLNLQKGDNVWVRHVSGKGYWSDSVPATTFTGFLIG*
LOC111102712	other/uncertain	MSAAVSSLELFRINQTHSKCDVSTRIAFTAGVTSSSSSWNSGTLVFPKVITNVGSGYNPSDGVFTAPMAGVYVFFVNVQGYSYQTIYVDIVLNGATKVRTMVWGNSPYTAHSAGPNLAVLSLQTGDRVWVKYHAGQGYYTHGDGPITTFSGFLI*
LOC111105007	other/uncertain	MLDKINDTTILLKSEIGQYEIDQLKMSAAVSSLELFRINQTQSKCDVSTRIGFTAGVTSSSSSWSSGTLIFPNVITNVGNGYNPIDGVFTAPRAGVYVFFVNVQSYSNNAIYVDIVLNGATKVRAMVDQGSQEYNDAGPNLAVLSLQTGDRVWVKHHSGQGYYTDSNGPITTFSGFLI*
LOC111103843	sC1q-like type 2	MRDIVLVGLLFIAGVQSVTVSKLTDEVSQNSTYHNLNEISATNVDVLRQLLNQETLIRINLVKNVHALMKDMLTLQEKLAETEGKLSRIKTTTDHEILELKKQVEFLKEENAALKNKTDVDEKEIMILKDTLVNVSKTLTDVKVEVRYLSITVIGMNDDFKEIDKRYQELENSTKEIETEISLNVRNNAATISELETRHLTLIDGLKNTTSSLQSDIDEYETNQLKISAAISSLELFRMNQTLSKCDPKQKVAFTAGVTSTSTTWNSGTLIFSSVIVNVGTGYNPSTGVFTSPVAGTYVFYVTAVEYSKQHLHVDIVLNSVSKVTLLGENDAGYQTGTNMVVLNLQKGDSVWVKHVSGKGYWSWTAPATTFSGFLIG*
LOC111102703	sC1q-like type 2	MKMICLYGLVFVAGIHSAAVSLLTDEIPHNSTSVNMNEISAKNMDVFRQLLNQEPLIRMTMVKNVHSLMKDMVTMQQNLAEAENKISSIQTSTDREISELNKQFERLKMENDALKNSSKVHENEIMRLKENLENVTQTLADVKVEVRYLSITVFGIDTHTKHIDNVVEELKNWTRKIEFEMMENLLNYTGAISDLETRHLKYIDDLIDTTNFLKADIDQHESAQLKMSATVSSLELFRLNKTLSKCDSDLKIGFTAGVTSGSSSWNSGTLVFPVVITNLGNGYNPSDGVFTAPTAGVYVFFVNVQSYDTKSIYVDIVLNGATKVRTMAYSYAGHGYHEAGPNLAVLSLQTGDRVWVKHHAGQGYHTNSDSPLTTFSGFLI*
LOC111103841	sC1q-like type 2	MRDIVLVGLLFIAGVQSESVSKLTDEVSQNSTYHNLNDILSVKNVDVFRQLLNQETLIRINLVKNVHALMKDMLTLQEKLAETEDKISRITTTTDHEILELKKQVEFLKVENAALKNKTAVDEKEIMILKENLVNVSNTLTDVKVEVRYLSITVFGMNDNLKEIDERFQELENSTKEIENEIRVNVKSNAASLSDLEKRHLTFIDDLKYTTSSLQADIGEYEINQLKISATISSLELFRINQTLSKCDPKQKVAFTAGVTSDSTTWNSGTLIFNSVILNVGNGYNPSTGVFTSPVAGTYVFYVTAVESIKQDLRVDIVLNSVSKVRTIGFHDAAFQTGTNMVVLNLKKGDSVWVRHYFGKGFYTDSVPITTFTGFLVGEIL*
LOC111102702	sC1q-like type 2	MRLISQVFHGLVLIVGINSASVSFLTDEHSSNRTNSNVTEITVKNVDVFRQLLNQETLIRMTMVKNVHSLMKDMLMLQENMAKADNKITGIQTSTDQEILELKKQVELLKKENDDLKNNSVVQDNEIAQLKETLKNVTNTLTEVKIEVRYLSIALFGMDTYSKEIDKGLQELKVWTRKIEFEMMENISNYAAAISDLDRKHLEYIDKINDTTIMLQSDIDQYEIDQLKMSAAVSSLELFRINQTQSKCDVSTRIAFTAGVTSSSSSWNSGTLVFPKVITNVGSGYNPSDGVFTAPMAGVYVFFVNVQGHSYQTIYVDIVLNGATKVRTMVWGNSPYTAHSAGPNLAVLSLQTGDRVWVKYHSGQGYYSHSNGPITTFSGFLI*
LOC111105430	sC1q-like type 2	MNAAKSLLIALFLTVTIFAQTDGHNPKLNLDDFEKEYVRIKKACTTIGYCRCHCTKKDGCQRVAFTAGINSSSTTFKSEILVFNNVISNVGNGYNKNTGIFTAPTNGTYVFSVAAVEYRRNFLYWDIVVNNMSKVRLMGDNGGPFNTATNTVVLSLTKNDQVWVKRMRGTGYYSASVPLVTFTGYLI*
LOC111105225	sghC1q	MTLQKGFLWLSWDIRKAGFLFVLFFNVCGYSDGKDTKPILEEFKKDYTIISEACKAVGYVKSTCNNQDGKQKVAFTASVTTPSSTLNSGTLVFNQVISNIGSGYNNCTGVFSAPTTGTYVFYASAVEHNKQNLQLDIVLNSVPKVRLMGYLSAAYQTGTNMVVLPLKRGDKVWVRHSYGTGYWTHNVPLTTFSGFMI*
LOC111104600	sC1q-like type 2	MQVILFYALMCIAGSQSATVSLLTDDILSNRTNSDVSEINVKNADVFRQLLNQETLIRMTMVKNVHSLMKDMLTLQENMAKAENKITGIQTSTDQEILELKKQVEWLRKENDYFKNKSVVQDNEIVQLKETLKNVNNTLNEVKIEVRYLSIALFGMDTYSKEIDKGLQELKNWTRKIEFEMMENVSNYAAAISDLDRKHLEYIDIINDTTILLKSDIDQYEIDQLKMSAAVSSLELFRINQTQSKCEVSTRMGFTAGVTSYSTSWNSGTLVFPKVITNVGKGYNPSDGVFTAPRAGVYVFFVNVQSYNTQSIWIDIVMNGATKVRTAAEASSSDHYDAGPNLAVLSLQTGDRVWVKHHSGQGYYTHSDCIITTFSGFLI*
LOC111103413	sC1q-like type 2	MRFLKDICLIVLVIINTPGTKGLLGHGNPNSSDLTHSFPGHIVDMTEVMQILENHTQQIKNQTQQIESDRTTIQLLQNRVFFLEAEQNKLNASKSFSTQEFSTYLISMNQLIQNMVANEENDKNLTNHFNAAVKQLDDLHTAMKLLNGSLLQQLEERISHVHDNIIANVSTRIAFTAGVTSFSVTWSSGTLVFPKVITNVGSGYNPSDGVFTAPRAGVYVFFVNVQSYNRFSIYVDIVLNGATKVRTMANSYGGNDYFDAGPNLAVLSLQTGDRVWVKYYFGQGYYTYSDGPITTFSGFLI*
LOC111102926	sC1q-like type 2	MRVFLFFALMCIAGSQSAAVSLLTDDILSNRTNLNVSEINIKNVDVFRQLLNQETLIRMTMVKNVHSLMKDMLTLQENLAKTDNKITGIQTTTDQEILELKKQVEWLKKENADLKNNSVVQDNEIAQLKETLKNVTNTLTEVKIEVRYLSIALFGMDTYSKEIDKGLQELKNWTRKIEIEMIENISNYAAAISDLDKKHLEYIDKINDTTILLKSDINQYEIDQLKLSAAVSSLELFRINQTQSKCDVSTRIGFTAGVTSESTSWNSGTLVFPTVITNVGNGYNPSDGVFTAPMAGVYVFFVNVQGYSSQSIYVSIVLNGATKVRTAAYAAGGDIEEAGPNLAVLSLQTGDRVWIKHYSGQGYTTNSDGPLTTFSGFLI*
LOC111103252	sC1q-like type 2	MQVILFYALMCIAGSQSATVSLLTDDILSNRTNSDVSEINVKNADVFRQLLNQETLIRMTMVKNVHSLMKDMLTLQENMAKAENKITGIQTSTDQEILELKKQVGWLKKENDYFKNKSVVQDNEIVQLKETLKNVNNTLNEVKIEVRYLSIALFGMDTYSKEIDKGLQELKNWTRKIEFEMMENVSNYAAAISDLDRKHLEYIDIINDTTILLKSDIDQYEIDQLKMSAAVSSLELFRINQTQSKCVVSTRIGFTAGVTSPSDSWNSGTLVFPKVITNVGNGYNPSDGVFTAPRAGVYVFFVNVQSYDTKYIYVDIVLNGSTKVRTMAFSYNGHGYNEAGPNLAVLSLQTGDRVWVKHHKGNGYWTNSDGLITTFSGFLI*
LOC111102701	sC1q-like type 2	MRLISQVFHGLVLIVGINSASVSFLTDEHSSNRTNSNVSEINVKNVDVFRQLLNQETLIRMTMVKNVHSLMKDMLMLQENLAKTDNKMTGIQTSTDQEILELKKQVEWLKKENDDLKNNSVVQDNEIVQLKETLKNVNNTLTEVKIEVRYLSIALFGMDAYSKEIDKGLQELKNWTRKFEYEMMENVSNYAAAISDLDKKHLEYIDRINDTTILLKSDIDQYEIDRLKLSAAVSSLELFRINQTQSKCDVSTRIGFTAGVTSQITSWNSGTLVFPKVITNVGSGYNPSDGVFTAPRAGVYVFFVNVQSYNTQNIYVDIVLNGATKVRTMAYSGGSTDTYEAGPNLAVLSLQTGDRVWIKHHSGQGYSTSSGGPLTTFSGFLI*
LOC111105006	other/uncertain	MKDMVTPQQNMADAENKISSIQTSTDREISELIKQVEKLKMENDALKNSSNVHENEIMRLKENLENVSHSLADVKVEVRYLSITAFGINIHIKEIDDGVEELKNWTRKFELEMIENSLNYTGAISELETRHLKYIDDLNDTTIFLKADIDQYESAQLKMSAAVSSLELFRLNQTLSKCDVSTKIGFTASVSSDSSSWTGNTLVFPQVITNVGNGYNPSDGVFTAPMAGVYVFFVNVQSYHQESIYMDIVLNGATKVRTMAYDYGDKDYNEAGPNLAVLSLQTGDRVWIKRYAGKGYYHDGPITTFSGFII*
LOC111103253	sC1q-like type 2	MQVILFYALMCIAGSQSATVSLLADDILSNRTNSDVSEINVKNADVFRQLLNQETLIRMTMVKNVHSLMKDMLTLQENMAKAENKITGIQTSTDQEILELKKQVEWLKTENDYFKNKSVVQDNEIVQLKETLKNVNNTLNEVKIEVRYLSIALFGMDTYSKEIDKGLQELKNWTRKIEFEMMENVSNYAAAISDLDRKHLEYIDRINDTTILLKSDIDQYEIDQLKMSAAVSSLELFRINQTQSKCDVSTRIGFTAGVTSSSTTWNSGTLVFPKVITNVGNGYNPNDGVFTAPRAGVYVFFVNVQSYGIMTIYVDIVLNGSTKVRTMSLNTSGEQHDAGPNLAVLSLQTGDRVWVKYYSGQGYYTTSDGSITTFSGFLF*
LOC111103251	sC1q-like type 2	MPLISQVFHGLVLIVGINSASVSLLTDEHSSNRTNSNVSEINVKNVDVFRQLLNQETLIRMTMVKNVHSLMKDMLTLQENMAKADSKITGIQTSTDQEILELKKQVEWLKKENADLKNNSVVQDNEIAQLKETLKNVTNTLTEVKIEVRYLSIALFGMDTYSKEIDKGLQELKNWTRKIEIEMIENISNYAAAISDLDKKHLEYIDKINDTTILLKSDINQYEIDQLKLSAAVSSLELFRINQTQSKCDLSTRIGFTASVTSYSSSWNSGTLVFPKVITNVGNGYNPSDGVFTAPRTGVYVFFVNVQSYGSYNIYVNIVLNGATKVRTMVNQGSQEANDAGPNLAVLSLQTGDRVWVKHYSGQGYWTDSDGPITTFSGFLI*
LOC111103844	sC1q-like type 2	MRKIVLVGLVFIAVVQSAAVSILTDEVSQNSTHPNLNEISAKNVDVFRQLLNQETIIRMNLVKNVHTLMKDMLTSKEKLADAEEKISRITSSTDQEISDLNKQVEFLKVENAAMKNKTTVVEKEIIMLKEKLENASNTLTDVKVEVRYLSISVFGINDDLKEIDERFQELENSTKEIETELSVNVRNNAATISQMETRHLTLIDGLRNTTSSLQSDIDEYETNQLKISATVSSLELFRINQTLSKCDPKQTVAFTAGVTSYSTTWNSGTLVFNSVILNVGTGYNPSTGIFTSPVAGTYVFYVTAVEFNTQYLRVDIVLNSVSKVRALGESNAAYQTGTNMVVLNLQKGDSVWVRYVSGKGYYTESVPITTFTGLLVG*
LOC111102700	sC1q-like type 2	MKLILRVFHGLVLIVGINSASVSFLTDEHSSNRTNSNVTEINVKNVDVFRQLLNQETLIRMTMVKNVHSLMKDMLTLQENLAKTDNKITGIQTSTDQEILELKKQVEWLKRENDDLKNKSVVQNDEIIQLKETLKNVNNTLTEMKIEVRYLSIALFGMDTHSKEIDKGLQELKNWTRKIEFEMMENVTNYAAAISDLDRKHLEYIDKINDTAILLKSDIDQYEIDQLKMSAAVSSLELFRINQTQSKCVDMSTRIGFTAGITSSSSSWNSGTLVFPVVITNVGNGYNPTDGVFTAPMAGVYVFFVNVQSHGTQNIRVDIVLNGATKVRAMAYSTGGHGYIEAGPNLAVLSLQTGDRVWIKHNSGQGYYTESAGPITTFSGFLI*
LOC111103410	sC1q-like type 2	MKMICLYGLVFVAGIHSAAVSLLTDEIPQNSTSVNMNEISAKNVDVFRQLLNQETLIRMTMVKNVHSLMKDMVTMQQNLAEAENKISSIHSSTDREISELNKQVEKLKNENDALKNSSNVHENEIMRLKENLENVTHNLADVKVEVRYLSITVFGIDTQIKEIDDGVEELKNWTRKIELEIMENLLNYTGAISELETRHLKYIDDLNDTTIFLKADIDQYESAQLKMSATVSSLELFRLNQTLSKCDASTKIGFTASVSSGSSTWSGSTLVFPQVITNVGNGYNPSDGVFTAPMAGVYVFFVNVQSYHQESIYMDIVLNGATKVRTMAYDYGDKDYNEAGPNLAVLSLQTGDRVWIKRYAGKGYYHDGPITTFSGFII*
LOC111103249	sC1q-like type 2	MKLILRVFHGLVLIVGINSDSVSFLTDDHSSNRTNSNVTEINVKNVDVFRQLLNQETLIRMTMVKNVHSLMKDMLTLQENLAKTDNKITGIQTSTDQEILELKKQVEWLKRENDDLKNKSVVQNDEIIQLKETLKNVNNTLTEMKIEVRYLSIALFGMDTHSKEIDKGLQELKNWTRKIEFEMMENVTNYAAVISDLDRKHLEYIDKINDTTILLKSDIDQYEIDQLKMAAAVSSLELFRINQTQSKCDVSTRIGFTAGVTSSSDSWNSGTLVFPKVITNVGNGYNPSDGVFTAPMAGVYVFFVNVQSYDTMTIYVDIVLNGATKVRTMAYSQGGHGYEEAGPNLAVLSLQTGYRVWVKHHHGRGYFTHSDNPITTFSGFLI*
LOC111103255	other/uncertain	MKDMVTMQQNLAEAENKISSIHSSTDREISELNKEVERLKIENDALKNSSNVHENEIMRLKENLENVTHNLADVKVEVRYLSISVFGIDTQIKEIDDGVEELKNWTRKIELEMMENLLNYTGAISELETRHLKYIDDLNDTMIFLKADIDQYESAQLKMSATVSSLELFRLNQTLSKCDVHVSSKIGFTASVSSTSTSWSGNTLVFPTVITNVGNGYNPSDGVFTAPMVGVYVFFVNVQSYSVETIYVDIVLNGATKVRTMAFDDGNNDYYEAGPNLAVLSLQTGDRVWVKRYSGKGYYHDGPITTFSGFII*
LOC111102922	sC1q-like type 2	MRCLRAIYFIVLVLFNIVETKGLLAHGNSNTSDPIHGPSGNIVDTTDILQMLLNQTTELENLKLQVETFKQQAENDRTTIQLLQNRVFFLETELTKLNASKPPSNQEFSTYLMSMNQLIQNMAANEENDKNVTHHLNGVVTKVAELQHALLNQSTEFEHYKQQSENDRSKVYLIQNFTQIIDNKLNDVRANVSQIRHNQTDEMMDYKQQLDNERSKVHLLQNLTQRLNQRLDDLNLQVRYTSLSLLDLHAATEQLDDSLLHQLEERISHVHDEIIASVSTRIGFTAGVTSSSSTWSSGTLVFPKVITNVGSGYNPSDGVFTAPRAGVYVFFVNVQSYSTQCIYVDIVLNGATKVRTMAYSGGSSDTYEAGPNLAVLSLQTGDRVWVKNYAGQGYYTHGG…
LOC111105004	other/uncertain	MNALVNVSTRIGFTAGATSINTTWNSGTLVFPKVITNVGNGYNPSDGVFTAPRAGVYVFFVNVQGYNTQTIYVDIVLNGAIKVRTMANTYYDAGPNLAVLSLQRGDRVWIKHYSGQGYTTHSDSPITTFSGFLI*
LOC111103316	sC1q-like type 2	MLIFLSLLMSTFARAPAFSSLLTDAENKTSTMLEGKHAWNDVDFLRQMINQETVIRLSLVKNVQALVSDVNLMKKSLTTSEMTISALQQTIETLNVRVDSLEEENKRFKESSVDYQERIHDLETTLETVNKSVNSLNENLDTAQKQNDEKRQNILNKTNRVIEDIKVEVRYLSVTLFDFKDHTATKDEMNSQNFIDIERHFNTSYEELQAENLETKRKFNEIKAHIHNVKAVQTEYQKTITENLTTTILEVETQTRKSEYERLKLSSAVSSLEAFRMNMTQSNCNKKLNVAFSAGIPSSDYEWVGSTLVFPDVIYSLGRGYDSNTGVFTAPTEENLTTTIADVDTQIRKSEYERLKLSAAVSSLEAFRLNMTKSSCDKNINTAFSAGISTNDDNWTGST…
LOC111104177	sC1q-like type 2	MMHCIRAIYFIVLVLFNIVETKGLLANGNSNSSDPIHGFSGHNVDTTDIIQMLLNQTFELENFKLQVETFKQQAEHDRTTIQLLQNRVFFLETELSKLNASQPLSTQEFSTYLMSMNKLIQNVATNGEINRNLTQRVDSLVKHFDDLNVQVRYTSLSLLDVHSLTEQLNVSIIQLLEERISDVHDHIANVSTRIAFTAVVTSYSSSWSSGILVFPNVVTNVGSGYNPSNGVFTAPRAGVYVFFVNVQAYSTYTIYVDIVLNGSTKVRTMAYGGNDYYDAGPNLAVLSLQTGDRVWVKHHSGQSYYYDGPITTFSGFLI*
LOC111102925	sC1q-like type 2	MKHETTMKLILRVFYGLVLIVGINSASVSFLTDEHSSNRTNSNVTEINVKNVDVFRQLLNQETLIRMTMVKNVHSLMKDMLTLQENLAKTDNKMTGIQTSTDEEILELKKQVEWLKKENDDLKNNSVVQDNEIVQLKETLKNVNNTLTEVKIEVRYLSIALFGMDTHSKEIDKGLQELKNWTRKIEFEMMENVSNYAAAISDLDRKHLEYIDKINDTTILLKSDIDQYEIDQLKMSAAVSSLELFRINKTKCDVSTRIGFTAGVTSSSSTWNSGTLVFPKVITNVGNGYNSSDGVFTAPRAGVYVFFVNVQGYSNNDVYVDIVLNGANKVRTMAQTNYDAGPNLAVLSLQTGDRVWVKYHAGQGYYTYSDSPITTFSGFLI*
LOC111102927	sC1q-like type 2	MMYCIRAVYFIVLVLFNIVETKGLLANGNSNASDPIHGSSGHNLDMTDMIQMLLNATTELENLKRQVENDKSTLETFKQQAENDRITMQNRMFLLETELTKLNASKPPTNQEFSTYLMSMNQLIQSVATNEENDKNLTHHFNAAVKQLDELKAEMLHTRLNQSTEMEHYKQQSESEKSKVYLLQNLTQRMSQRLDDLNVQFRYTSLSLLDLHTATEQLNGSLLQQLEERISHIPDEIIANVSTRIGFTAGVTSASTSWNSGTLVFPKVVTNVGNGYNPSDGVFTAPRAGVYVFFVNVQSYGTQYIYVDIVLNGASKVRTMAQTNYDAGPNLAVLSLQTGDRVWVKYHVGQGYYSHSDGPITTFSGFLI*
LOC111102709	sC1q-like type 2	MHGLRAIHFVPLVLINIVETKGLLANGNSNNSDPIHGSSGHNVDTTDIMQLLLNQTTELENLRQQVETFKQQAENDRITMQNRIFLLETELIKLNASKPPSTQEFSTYLMSMNQLIQSVATNEENDKNVTNQLNVAVKQLDELKAEMLHTRLNQSREMEHYKQQSESEKLKVYLLQNLTQRMSQRLDDLNVQFRYTSLSLLDLHTATEQLNGSLLHQLEERISNVHDDIIANVSTGLRIGFTAVVTSTSSSWNSGTLVFPKVITNVGNGYNPSDGVFTAPKAGVYVFFVNVQSYNTQSIYVDIVLNGAIKVRTMASDAGGSEFYEAGPNLAVLSLQTGDRVWIKYYAGQGYWTYSDGPLTTFSGFLI*
LOC111102706	sC1q-like type 2	MKMICLYGLVFVAGIHSAAVSLLTDEIPHNSTSVNMNEISAKNVDVFRQLLNQETLIRMTMVKNVHSLMKDMVTLQQNLAEAENKISSIHSSTDREISELNKEVERLKIENDPLKNSSNVHENEIMRLKENLENVTHNLADVKVEVRYLSITVFGIDTQIKEIDDEVEELKNWTRKNELEIMEKLLNYTGAISELETRHLKYIDDLNNTTIFLKADINQYESAQLKMSAAVSSLKFFRLNQTLSKCEVSTKIGFTASVSSSSSSWTGNTLVFPQVITNVGNGYNPSDGVFTAPMAGVYVFFVNVQSYHQETIYVDIVLNEATKVRTMAYDYGDNDYYEAGPNLAVLSLQTGGKVWVKRYSGKGYYYEGPITTFSGFII*
LOC111103258	sC1q-like type 2	MDRDNRNTPLMCLVLSIVVILAILAVFVNDHDKKLKALDSLSTHLVQRVENLTRENEKLTEIIEDVSTRIGFTAGATSSSTTWNSGTLVFPKVITNVGNGYNPSDGVFTAPRAGVYVFFVNVQSYGTQTIYVDIVLNGATKVRTMAYGGASDHYSAGPNLAVLSLQTGDRVWVKHHAGQGYFTLSTFSGFLI*
LOC111105311	sghC1q	MERNTGILLAVSLVVLNCGYCDAKDAKPILEEFKKDYSSISEACKAVGFVRDACSTQVDQRKVAFTASVVSSSSSWNSGTLVFNKVISNVGKGYDPKTGVFTAPIAGMYVFYVAAIEYGTQHLRSDIVINNVPKVRMLGYNTAGYQTGTNMVVQYLKRGDNVRVAHFQGSGYYSENAPMTTFTGFMI*
LOC111105008	other/uncertain	MRRNIVPSVNTHILHYSGSMQRGPKPIPGHTYSHSGAYLAGGVPKERPPSHMGNVHLSIGVPIEAYSANTRTCATQASPDHQEAGSKEPQVTPPILGPDPVRIGFTAGVTSSSSSWSSGTLVFPKVITNVGNGYNPSDGVFTAPRAGVYVFFANVQGYSSQTISVDIVLNGSTRVRTMAYSFRGNEHEEAGPNLAVLSLQTGDRVWVKYYTGLGYWTYSDGPITTFSGFLI*
LOC111103254	sC1q-like type 2	MMYCIRAVYFIVLVLFNIVETKGLLANGNSNASDPIHGSSGHNLDMTDMIQMLLNQTTELENLKRQVENDKSTLETFKQQAENDRITMQNRMFLLEAELTKLNASKPPTNQEFSTYLMSMNKLIQNFATNEENDRNLTQRVDSLVKHFDDLNVQVRYTSLSLLDVHSLTEQLNVSIIQLLEERISGVHDHIANVSKRIGFTAGVTSTSTSWNSGTLVFPKVITNVGNGYNPSDGVFTAPRAGVYVFFVNVQGYSTHEVDVDIVLNGETKVRIMAYNNFDAGPNLAVLSLQTGDRVWVKHYGGQGYLTNSDPITTFSGFLI*
LOC111105506	other/uncertain	MGRCEYDKEDKTRSNVAFVAELSTSIVNPPNNFHIIFYHVIFNKGNGYSGTHGMFYAPFPGLYHFAVELTAPPQSSSHTMHVRIMKKTQPVAITFLDVNTHQFLRRTGSIILQLDTGDDVWCQTEYISGHNTIFGGTTYSMFSGFIIQPML*
LOC111104217	other/uncertain	MVTDQETEALDIETPEKVPDFRLNIFTPKRNFIRKERLLLQPTTVPSGSVAFFAYFSTHNDASSTHHILAFDKVITNIGNAYHSHTGTFIAPQSGIYVFIWTIRLDGNNYHTTELVHDNNVISSVYLDPQNRMLGTATGTAVVYANQGEDVYIRTGATYSNGRITSDTNGRSSFAGWILM*
LOC111105451	sghC1q	MKLIVGILLYCLFLYVRGKQSTQQKKLESLKSLIFNNAKATVTLNSTDLKQLLSLSRPSLGKANTAYSGRKIGFYVSLKSSSNYGSRQTVKFDSILVNDGNGYDDRTGVFTCPVAGTYMFVVDVQLNKYAYLSIMLNKTAVARLYRDSKAPILQASRTILLKLKQGDHIKIVCENNNVNINGNLYSGFTGTFLY*
LOC111103417	other/uncertain	MCQDISVYLVLCIGVLVAILAVFVNDHDKRLEALDSLSTHLGKRVENLTRENEKLTEIIEVVFVNNHEKRLKELDTLSSQLGKKVENLTKEDEKLKEIIEGNSKKVAFTAGTHAPRTTASGHTLVFPVVINNEGGGYDPSSGVFTAPRDGQYVFFVSAQGYSSDTLYVSIVHNGGPKVMTMSDGGRKKDFYDSGSNLVALNLKMDDRVWAQCQSGSHYHSEGIAITTFSGFLV*
LOC111102928	sC1q-like type 2	MFKLISLFGLVFIGVQCISDDILQSSANPNKADTDVKNIDVFRQLLNQETIIRMNLEQKVQQMMADLSTLKERTEAGGKTCMNQLPSEQEIRELKVQVEWLKTENNALRNLSVVGEREILFLKEKLRIVVSQLTDNQRFDTNTNSEGINDKIQVLQKRLQDSESKILANVAKNTAAISELETQHLIYNATINNSISSLQASLNQYESNLDSNQTVSKFDNLTKIGFTASVTSSNWSWNSGTLVFPNVITNLGNGYNPSDGVFTATMAGVYVFFVNVQSYTFNTIHVDIVLNGMTKVRTMAYGYDGKEAYEAGPNLAVLSLQTGDRVWVKHHSGKGYYYVGPITTFSGFMI*
LOC111102705	sC1q-like type 2	MKMICLYGLVFVAGIHSAAVSILTDEIPHNSTSVNMNEISAKNVDVFRQLLNQETLIRMTMVKNVHSLMKDMVTLQKNLAEAENKISSIQTSTNREISELNKQVEKLKNENDALKNSSNVHENEIMRLKENLENVTHTLADVKVEVRYLSITVFGIDTHTKHIDDGIEELKNWTRKIELEMMDNLLNYTGTISELETRHLKYIDDLNGTTDFLKAEIDKYESAQLKMSSAVSSLELFRLNQTLSKCDATPKIGFTTSVSSSSSSWNSGTLVFPVVITNVGNGYNPSDGVFTAPRAGVYVFFVNVQSYTKQTIYVDIVLNGSTKARTMANNGGGSEYYEAGPNLAVLSLHTGDRVWVKYYYGKGYYHDGPITTFSGFII*
LOC111104178	other/uncertain	MCQDISVYLVLCIGVLVAILAVFVNDHDKRLEALDSLSTHLGKRVENLTRENEKLTEIIEVVFVNNYEKRLKELDTLSSQLGKTVENLTREDEKLKEVIEGISKKVAFTAGTHAPGTTASGHTLVFPVVINNEGGGYNPSSGVFTAPRDGQYVFFVSAQGYSSDTLYVSIVHNGGPKVMTMSDGGRKKDFYDSGSNLVTLNLKMGDRVWAQCQSGSHYHSEGIAITTFSGFLV*
LOC111104599	sC1q-like type 2	MRLISQVFHGLVLIVGINSASVSFLTDEHWSNRTNSNVSEINVKNVDVFRQLLNQETLIRMTMVKNVHSLMKDMLTLQENMAKADSKITGIQTSTDREILELKKQVEWLKKENNDLKNNSVVQDNEIAQLKETLKNVTNTLTEVKIEVRYLSIALFGMDTYSKEIDKGLQELENRTRKIEIEMMENISNYAAAISDLDRKHLEYIDKINDTTILLKSDIDQYEIDHLKISAAVSSLELFRINQTQSKCDVSTKIGFTAGVTSNSGSWNSGALVFPKVITNVGSGYNPSDGVFTAPRTGVYVFFVNVQSYSTQSIYVDIVLNGAIKVRAMVSQGGQEYNDAGPNLAVFSLHTGDRVWIKHYSGKGYTTNSDGLITTFSGFLI*
LOC111102707	sC1q-like type 2	MKMICFYGLVFVAGIHSAAVSILTDEIPHNSTSVSMNEISAKNVDVFRQLLNPETLIRMTMVKNVHTLMKDMVTLQQNLAEAENKISSILSSTDREISELNKEVERLKIENDALKNSSNVHENEIMRLKENLENVTHNLADVKVEVRYLSITVFGIDTQIKEFDDGVEELKNWTKKNELEMMEKLLNYTGAISELETRHLKYIDDLNDTTIFLKADIDQYESAQLKMSAAVSSLELFRLNQTLSKCDVSTKIGFTASVSSTSSSWTGNTLIFPNVITNVGNGYNSSDGVFTAPRAGVYVFFVNVQSYSVETIYVDIVLNGVTKVRTMAYDSGDKDYYEAGPNLAVLSLQTGGRVWVKRYSGKGYYHDGPITTFSGFII*
LOC111104481	sC1q-like type 2	MLLLFVFLVSVDGYLMNNPEPVGSEETLTERVQMLMTEVLHLKNDVSDLKSQLSVLKAKDVSVAFYAYLANDLVNLTARTSLTFSGIRTNVGNAYDPAHGVFVAPVSGTYNFAFTGSAQPQSQDHGVHIFLKKNGVNELYVFFDHNDKKWIQHGSSAILHLARGDRIWLETGDIWGSNILGGSRASDNAYHSHFSGFLIQAD*
LOC111102731	sC1q-like type 2	MFKLISLFGLVFIGVQCISDDILQSSANPNKADTDVKNIDVFRQLLNQETIIRMNLEQKVQQMMADLSTLKERTEAGGKTCMNQLPSEQEIRELKVQVEWLKTENNALRNLSVVGEREILFLKEKLRIVVSQLTDNQRFDTNTNSEGINDKIQVLQKRLQDSESKILANVAKNTAAISELETQHLIYNATINNSISSLQASLNQYESNLDSNQTVSKFDNLTKIGFTASVTSSNWSWNSGTLVFPNVITNLGNGYNASDGVFTAPMAGIYVFFVNVQSYVFNTIHVDIVLNGITKVRTMAYGYDGKEAYEAGPNLAVLSLRTGDRVWVKHHSGKGYYYVGPITTFSGFMI*
LOC111104204	sC1q-like type 2	MATLFLVPAFGFFILNFSPEKHVFAQPNENWDDGPNWNLAIKKIKELENLVKIQDERISVLEKRPTLSEFRSTVELQETVQRQNDRIVKLETRISELEVMVTDTKAEAIHIEPSEEVPNFGLKIFTPEKNFIRKERILLQPTTVPAESVAFFAYFSTHNVAASPQQILAFDKVITNIGNSYHPHSGTFIAPRSGVYVFIWIIRLGRTNYHTTELLHDNNVINSIYLDPQNRMDGTVTGTAVVHVNQGEDVLIRTGAHSNGRIDSDTNGRSSFAGWLLM*
LOC111104509	sC1q-like type 2	MLLLFVFLVSVDGYLMNNPEPVGSEETLTERVQMLMTEVLHLKNDVSDLKSQLSVLKAKDVSVAFYAYLANDLVNLTARTSLTFSGIRTNVGDAYDPAHGVFVAPVSGTYNFAFTGSAQPQSQDHGVHIFLKKNGVNELYVFFDHNDKKWIQHGSSAILHLARGDRIWLETGDIWGSNILGGSRASDNAYHSHFSGFLIQAD*
LOC111103317	sC1q-like type 2	MLMFLSLLISTFARAPAYSSLLTDAENKTSTTLEGKHAWNDVDFLRQMINQETVIRLSLVKNVQALVSDVNLMKKSITTSEMTISALQQTIETLNVRVDSLEEENKRLKESSVDHQERIHDLETTLETVNVSVNSLNENLDTAQKQNDEKRQDIVNKTNRVVEDIKVEVRYLSVTLFDFKDHTSTTDEINNQKFIDIERHINTSFEELQTENVKNKGEFNEIKEHIHNVEKVQTEYRKTVTENLTTTIAEVETQSRKSEYERLKLSSAVSSLEAFRMNMTQYNCNKKLNVAFTAGIPSTDNNWSGSTLVFPDVIYSEGKGYDSNTGVFTAPTEGTYLFYISIQSAYQKYIYLDIVLNGSYKVRSIAHYGSGSTININQTGTNLVILYLTVGDRVWVKRD…
LOC111103408	sC1q-like type 2	MALCFIFMLVYILVRTHAYSLLTDGENKTSTTLEGKEHACNDLSFLRQMINQETVIRLSLVKNVQALVSDVNLMKKSITTSEMTISALQQTIETLNVRVHSLEEENKRLKESSVDHQERIHDLETTLETVNKSVNSLNENLDTAQKQNDEKRQDIVNKTNRVLEDIKVEVRYLSVTLFDFKDHTATKDEINNKKFIDLERHVNTSFEELQAENLKNKGEFNEIKEHIHNVEEVQTEYRKTVTENLTSTIAEVETQSRKSEYERLKLSSAVSSLEAFRMNMTQSNCNTKSKIAFSAGIPSYDDNWTGSTLVFPDIIYSEGKGYDSNTGVFTAPTEGTYLFYISIQSAYRKYIYLDIVLNGSSKVRSMAFYGSGRTISIYQTGTNLVILHLTVGDRVWVKR…
LOC111105001	other/uncertain	MIRTRLNQTNALMDIKHRLESEGATVYFLQNFTKKTDLEVNDLRNDMTRTRLNQTNEMEDYKEQLEHEKSKVFALKNLTQRLNQRLNDLNVQFRYTSLSLLDLHTMTEQLSGSLLQRLEERISNVRDHIIANVSTRIGFTASVTSPSNTWNSGTLVFPKVIKNVGNGYYPSDGVFTAPMAGVYVFFVNVKSYDTLVIYVDMVFNGTSKVRTMAETSLNDHDDAGPNLAVLSLKTEDRVWIKHNAGAGYYTFSDGPVTTFSRFLILGVVSL*
LOC111102418	sghC1q	MKLIVGIILCCLCFYASGKQSTQQKKLESLKSLIFNNAKATVTLNSTDLKQLLSLSRPNLRKAKTAYSGRKIGFYASLKNYKKHAGGQTVIFDDILVNDGNGYDDRTGVFTCPAAGTYMFVVDVLLYKHARLSLRLNKTTIAKIYRGSNFTKSPAIQISRTVLLKLKRGDHVKIVSDFNNIHIRSNKYSGFTGTFLY*
LOC111105441	sC1q-like type 2	MLIFLSLLMSTFARASAFSSLLTDAENKTSTMLEGKHAWNDVDFLRQMINQETVIRLSLVKNVQALVSDVNLMKKSLTTSEMTISALQQTIETLNVRVDSLEEENKRLKESSVDYQERIHDLETTLETVNKSVNSLNENLDTAKKQNDEKRLDIMNKTNRVIEDIKVEVRYLSVTLFDFKDHTATKDEMNSQNFIDIERHFNTSYEELQAENLETKRKFNEIKAHIHNVKAVQTEYQKTITENLTTTIAEVETQSRKSEYERLKLLSAVSSLEAFRMNMTKSNCDKKMNVAFSAGIPSYDDNWIGSTLVFPDVIYSEGKGYDSNTENLTTTIADVDTQIRKSEYERLKLSAAVSSLEAFRLNMTKSSCDKNINTAFSAGISTNDENWTGSTLVFPDVIY…
LOC111105585	sC1q-like type 2	MAVCFIFTLVYILVRSHAYSLLTDGENKTSTILEGKDHAWNDVDFLRQMINQETVIRLSLVKNVQALVSDVNLMKKSITTSEMTISALQQTIETLNVRVDSLEEENKRLKESSVDYQERIHDLETTLETVNVSVNSLNENLNTANKQNDEKRQDIVNKTNRVLEDIKVEVRYLSVTLFDFKDHTATKNKVNNQQFIDLERHINTSFEELQAENLKNKEEFNEIKEHIHNVEKVQTEYRKTVTENLTTTIAEVETQSRKSEYERLKLSSAVSSLEAFRMNMTQSNCNKKTKIAFSAGIPSSDNTWTGSTLVFPDVIYSEGKGYDSNTGVFTAPTEGTYLFYISIQSGHQKKIYLDIVLNGSIKVRSMAYYDSGSAISIYQTGTNLVILYLTVGDRVWIKR…
LOC111105444	sC1q-like type 2	MLMFLSLLISTFVRASAYSSLLTDAENKTSTTLEGKHAWNDVDFLRQMINQETVIRLSLVKNVQALVSDVNLMKKSITTSEMTISALQQTIETLNVRVDSLEEENKSLKESSVDHQERIHDLETTLETVNVSVNSLNENLDTAQKQNDEKRQDIVNRTNRVLEDIKVEVRYLSVTLFDFKDHTSTKDEINNQKFIDIERHVNTSFEELQAEILKNKGEFNEIKEHIHNVEKVQTEYRKTVTENLTTTIAEVETQSRKSEYERLKLSSAVSSLEAFRMNITQSNCNKGSKIAFSAGISSGNSGWSGSTLVFPDVIYSEGKGYDSNTGVFTAPTEGTYLFYISIQSAYQKNIYLDIVLNGASKVRSLAHYGSGSTINIHQTGTNLVILYLTVGDRVWVKRG…
LOC111105442	sC1q-like type 2	MLIFLSLLMSTFARAPAFSSLLTDAENKTSTMLEGKHAWNDVDFLRQMINQETVIRLSLVKNVQALVSDVNLMKKSITTSEMTISALQQTIETLNVRVDSLEEENKRLKESSVDYQERIHDLETTLKTINESVNSLNENLDTALKENDEKRQDIVNKTNRVLEDIKVEVRYLSVTLFDFKDHTATKNKVDNQKFIDIERHVNTSFEELQAENLKNKGEFNEIQEHIHNVEKVQTEYRKTVTENLTTTIAEVETQSRKSEYERLKLSSAVSSLETFRMNMTKSNCDKKMNVAFSAGIPSHNYDWVGNTLVFPDVIYSEGKGYDSNTGVFTAPTEGTYLFYISIQSALQKYIYLDIVLNGSAKVRSMAHYASGSTINIHQTGTNLVILYLTTGDRVWVKRG…
LOC111104290	sC1q-like type 2	MSLQTFPVLILCAFYFLTNSYIYADQDEIVDVNTDWKWAVRKIKELEEQVRIQDERILTLEKRPTASEWTSMVDIRKTVQKQHDRIVQLEARIDELETQTEIENNELGETSSPERMHVSQSKRPMINSKRSMVKNARLLLQPTPVPVETVAFFAYFSTHNPPSMHHHILAFDTVITNVGNAYHPQSGTFIVPKTGLYVFTWTIRLWGSSYHTSELLVDNNVVNTIYLDPNNHIDGSVTGTAVVLVNQGDDVLIRTGSENNNGDIKSDTHGRSSFAGWILM*
LOC111105588	other/uncertain	MTENLTTTIADVDTQIRKSEYERLKLSAAVSSLEAFRLNMTKSSCDKNINTAFSAGISTNDENWTGSTLVFPDVIYSEGKGYDSNTGVFTAPTEGTYLFYISIQSAFQKYSHFDVVLNGSTKVQSLAWYDGGSTIRIHQTGTNLVILYLTVGDRVWVKRAGGVGYYSNDKHVCTFSGIRLY*
LOC111105013	sC1q-like type 2	MMLICISLLIFGFDGVLAFTAILTDQENKTSTTLEGKEHALSDVDFLRQMINQETVIRLSLVKNVQALVNDVILMKKSITTSEMTISALQQTIETLNVRMDSLEKENKRLKESSNNYQETIYDLETTLETVNVSVNSLNQNLDTAQKQNDEKRQNTMNKTNCVLEDIKVEVRYLSVTLFDFKDHTATKDEINNQKFIDIERYFNTSFEELQAENLKNKGDFNEIKEHIHNVEKVQTEYRKTVTENLTTTIAEVETQSRKSEYERLKLSSAVSSLEAFRMNMTQYNCNKGSKIAFSAGISSGDSGWSGSTLVFPDVIYSEGKGYDSNTGVFTAPTEGTYLFYISIQSAHEKYIYLDIVLNGSAKVRSMAHYGSGSTISIYLTGTNLVILYLTLGDRVWVK…
LOC111104971	sC1q-like type 2	MAELFLVLAFGFLVFNSSANKHVFAESEENWDDIPDWKQAVRKIKELENLVKIQNERISILEERPDLSEWKSTAQLQETVNRQNDRIDKLVTRISELEAMTTDQKTEAIQIKTPEEVSDPKLTTFTPRKNFIRKERLLLQPTTVPAESVAFFAYLSTHNDASSSHHILAFDKVITNIGNAYHANMGAFIAPRSGIYVFIWTVRMNGHNYHTTELVHNNTVVNAIYLNPQNIEGTVTGTAIVHANQGEDVLIRTGTLSNGAIISDTNGRSSFAGWMLI*
LOC111105445	sC1q-like type 2	MLMFFSLLISTFARAPAFSSLLTDAENKTSTTLEGKHAWNDVDFLRQMINQETVIRLSLVKNVQALVSDVNLMKKSLTTSEMTISALQQTIETLSTRVDSLEEENKRLKKSSVDHQERIHDLETTLETINESVNSLNENLDTALKENDEKRQDIVNKTNSVLEDIKVEVRYLSVTLFYFKDHTATKDEINNQKFIDIERHVNTSFEELQAANLKNKGEFNEIKEDINNVKAVQTEYQKTMTENLTTTIAEVETQSRKSEYERLKLSSAVSSLEAFRMNMTKSNCDKMNVAFTAGIPSHNYDWVGSTLVFPDVIYSEGKGYDSNTGVFTAPTEGTYLFYISTQSKYQKYIFLDIVLNGASKVRSMAHYTSGSAIGIHQTGTNLVILYLTVGDRVWVKRAD…
LOC111104491	sC1q-like type 2	MEFIVFLLFGIYFTNFVAGMDRNMNLSDDSLISQQTQIDFLVQKVSELSHTLELQGFEIDDLRKENQDLIQTVSEMKRTHCPSQAVTKDSGNKADINLEGNSARQHPGIIRKERLLVPLPQTTTPLPKENVIAFYAYMSGDFPNPGASHTLIYDTVITNEGNGYHSATGSFIAPQTGFYVFSWTMRLANGEYHRAELVHNHKVMGVAYLYAPTGDHMVSDVVVFHVNQGDDVFVRTQTGANNGDIESGFGGRSSFTGWKLN*
LOC111104999	other/uncertain	MSNGSTRIGFTAGVTSSSSSWSSGTLVFPKVITNVGNGYNPSDGVFTAPRAGVYVFFVNVQSYGSQIIFADIVLNGAIKVKILATGNYNAGPNLAVLSLQTGDRVWVEHYFGQGYSTYFGGLLTTFSGFLI*
LOC111102864	sC1q-like type 2	MSLQTFPVLILCAFYFLTNSYIYADQDEIVDVNTDWKWAVRKIKELEEQVRIQDERILTLEKRPTASEWTSMVDIRKTFQKQHDRIVQLEARIDELETQTEIENNELGETSSPERMHVSQSKRPMINSKRSMVKNARLLLQPTPVSVETVAFFAYFSTHNPPSMHHHILAFDTVITNVGNAYHPHSGTFIAPRTGLYVFTWTIRLWGNSYHTSELLVDNNIVNTIYLNPVNEIDGSVTGTAVVLVNQGDDVLVRTGSNYNNGDIKSDTNGRSSFAGWILM*
LOC111103318	sC1q-like type 2	MLMFLSLLISTFARAPAFSSLLTDAENKTSTTLEGKHAWNDVDFLRQMINQETVIRLSLVKNVQALVSDVNLMKKSLTTSEMTISALQQTIETLNVRVDSLEEENKRLKESSVDYQERIHDLETTLETVNKSVNSLNENLDTVQEQNDEKRQDIVNKTNRVLEDIKVEVRYLSVTLFDFKDHTATKDEMNNQKFIDIERHFNTSFEELQAENVKNKREFNEIEEHIQNVEKVQKEYRKTVTENLTTTIADVDTQIRKSEYERLKLSAAVSSLEAFRLNMTKSSCDKNINTAFSAGISTNDDNWTGSTLVFPDVIYSEGKGYDSNTGVFTAPTEGTYLFYISIQSAFQKYSHFDVVLNGSTKVQSLAWYDSGSTIRIHQTGTNLVILYLTVGDRVWVKRA…
LOC111104216	sC1q-like type 2	MAKLLLVLAFGFFVFNSFADKHVLAETEENWDDSPDWNQAVRKIKELEKIVKIQNERISMLEERPSLSEWKSIVELQETVQIQNDRIVKLETRVSELEAMMTDQKTEAIQKETPGEDSDSKLTAFTPRKNFIRKERLLLQPTTVPAESIAFFAYFSTNNDASSTHQILAFDKVITNIGNAYHPHSGSFLAPRSGVYVFIWTIRLNTNRYHTTELLHDNNVINSIYLNPGSAIDGTVTGTAVVRVNQGEDVLIRTGSLSNDIILSDANGRSSFAGWILM*
LOC111105586	sC1q-like type 2	MLMFLSLLISTFARAPAYSSLLTDAENKTSTTLEGKHAWNDVDFLRQMINQETVIRLSLVKNVQALVSDVNLMKKSITTSEMTISALQQTIETLNVRVDSLEEENKRLKESSVDHQERIHDLETTLETVNVSVNSLNENLDTAQKQNDEKRQDIVNRTNRVVEDIKVEVRYLSVTLFDFKDHTSTKDEINNQKFIDIERHVNTSFEELQAENLKNKGEFNEIKEHIHNVEKVQTEYRKTVTENLTTTIAEVETQSRKSEYERLKLSSAVSSLEAFRMNMTQSNCNKKTKISFSAGIASGDGGWSGSTLVFPDVIYSEGKGYDSNTGVFTAPTEGTYLFYISIQSAHQKYIYLDIVLNGSSKVRSMAYYTSGSAIGIHQTGTNLVILYLTVGDRVWIKRS…
LOC111105019	sC1q-like type 2	MTVLFVLAVTLLFVFNASAESEEDLNTSPDWIFAIRKIKELENQIKIQDERISTLEKRPLDEEWKSVINLQKTVQKQNDRINQLEARIYELEGIVQDDNIEYVQTKSPTNVSEPNNSTMRSDKSMIRKADTHISAESNESLDIDSDWKSAIRKIAELEKLVRVQEERIYALEKRSTEAELKCASHLQRTVQIQNDRIRHLEKQVYKLEVQDQDEEIESIHTESPRELHMSDSEPTTIKPKKSLIRKERSFLQTAENIAFFAYFSSTTMASTTHHILAFDTVITNVGYAYHSHVGTFIAPHTGFYVFTWSIRMNRRNEHTTELVINSDVVNSIYLYPDNNTDGTVSGTAVVFVQQGDDVFIRTGPRLSLGEIISDGNGRSSFAGWSLF*
LOC111104395	sC1q-like type 2	MHTTAFIAMAAVLGLMDTVYMYTDTGNNSENSSSGPSSNTTVLNNLLAREIVQRQILENKVVTLERQIQALVSDVAKSKSVCATLQRDVQGISLRQTNMATSLQTITQRVDSENVNIKESIQHLSNIATSLQSNSGRAAVSPVAFLTRMSTTSSPSQMEPTLRFDSTEFNLGQGYDSTSGIFQAPVGGVYSFQTTIFVQSGQYEGYISKNGVPEAYLSVRGGPYQVSDSQSLTLSLNPGDQVWVVQRDTPGPRLTPGKSLFSGHLILAV*
LOC111102358	sC1q-like type 2	MLGLYLLVSCIAVTLERSPSKLELIEERIDQLENALKACTSPDLRKRASNPTTPVAFSAYLSSDVTPVADYEALVYDHVIYNSGDAYNAHVGRFRAPVRGIYHFVATSQSYSSDYIEFELVKDATMLCRGRGSQSYQSTGTCAATVHLYANNDVWVRHYSSQGNAIKGSGYSVFTGFLVHAD*
LOC111104205	sC1q-like type 2	MATLFIVFAFGFFILNFSAEKHVFAQSNENWDDGPNWKMAVKKIEELEKLVKIQDERISILEKGPSLSEFRSIAELQETVQIQNNRIVKLEIRISELEAMVTDKKPEAIDIETPEKVSEFRLSMFTPKRNFIRKERLLLQPTTVPAESVAFFAYFSTNNVASSPHHILAFDKVITNIGNAYHPHSGSFLAPRSGVYVFIWTIRLDGNNYHGTELLHDNNIINSIYLNPGNVIGGTATGTAVVHVNQGEDVLVRTGDISNGRIVSDTNGRSSFAGWLLM*
LOC111105443	sC1q-like type 2	MLMFLSLLISTFARASAYSSLLTDAENKTSTTLEGKHAWNDVDFLRQMINQETVIRLSLVKNVQALVSDVYLMKKSITTSEMTISALQQTIETLNVRVLSLEEENKRLMESRVDYQERIHDLETTLETVNVSVNSLNENLDTAQKQNDEKRQDIVNKTNRVLEDIKVEVRYLSVTLFDFKDHTATKDENNNQKFIDIERHVNTSFEELQAENLKNKGEFNEIKEHIHNVEKVQTEYQKTITENLTSTIAEVETQLRKSEYERLKLSSAVSSLEAFRMNMTQSNCNTKSKIAFSAGIPSYDDNWTGSTLVLPDIIYSEGKGYDSNTGVFTAPTEGTYLFYISIQSAYRKYIYLDIVLNGSSKVRSMAFYGSGSTISIYQTGTNLVILHLTVGDRVWVKRT…
LOC111105315	sC1q-like type 2	MLRLYLLVSCITVTLARSPSRLELIEERIDQLENALKACTSPDLRKRASNPTTPVAFSAYLSSDVTPVAVYEALVYDHVIYNSGDAYNAHVGRFRATVAGIYHFVATSQSYSSDYIEFELVRDGIMLCRGRGSQSYQSTGTCAATVHLSANQDVWVRHYSTNGNYIRGSGYSVFTGFLVHAD*
LOC111105447	sC1q-like type 2	MLIFLSLLISTFARAPAFSSLLTDAENKTSTTLEGKHSWNDVDFLRQMINQETVIRLSLVKNVQALFNDVNLMKKSITTSEMTISALQQTIETLNVRMDSLEKENKRLKESSVDYQERIHDLETTLETVNKSVNSLNKNLDTAQKQNDEKRQDIVNKTNRVLEDIKVEVRYLSVTLFDFKIHTAIKDEINNQKFIDIERDVNTSFKELQAGNLDVKRQFNEIKDNVHDLEEVLSEYQKAMTENLTTTIADLDTQIRKSEYERLKLSAAVSSLEALRLNMTKSSCDKNINTAFSAGISSNDDNWTGSTLVFPDVIYSEGKGYDSNTGVFTAPTEGTYLFYISIQSAFRRYSHFDVVLNGSPKVQSLAWYDSGSIIRIHQTGTNLVILDLTVGDRIWVKRA…
LOC111104258	sC1q-like type 2	MDFAVCLLFGVILTNCVSGLQEESGLPEDPIISLQSQIDFLMQKVSELSRTSVLQKVEIDDLKTENRNLLQFLSEVKSPQQHSQKIPDNLYVYEEEKIFDGNKATDIQSVIRKERLLLPLPQTTPSPPKENVVAFYAYMSGDFLNPGGYQTLIYDTVITNEGNGYHSATGNFIAPQTGFYVFSWTMRLANGEYHQAELVHNRKVMGVAYLYAPTGDHMVSDVVCFHVNQGDDVFVRTQGGANHGNIESGYGGRSSFTGWKLN*
LOC111104570	sghC1q	MERHTRILLTAIFGILYCGYNDAKDAKPMLEEFKKDYSSITEACKAVGFVRDACTNRVDQRKVAFTASVVASNTSWNSGTLIFNQVISNVGNGYDPKTGVFTAPRAGTYIFYAAAVEYSTQYLRLDIVINNVPKVRLLGYNSASYQTGTNMVAQYLRRGDDVRVIHSYGNGYYSTTVPITTFTGFMI*
LOC111104202	sC1q-like type 2	MCLTMATLFLVLVFGFFAFNSSADKHVFAESEENWDDIPDWKQAVRKIKELENLVKIQNERISILEERPNLSEWKSIVELQETVQRQNDRIAKLETRVFELEVMVTNQETEIIHKETPGEFSDTKLSTFIPKNFIRKERLLLQPTTVPAESVAFFAYFSTNNDASSTHHILAFDKVITNIGNAYHSHSGTFIAPRSGVYVFIWTIRLSGTRYHTTELLHDNNVINSIYLNPGSAIDGTVTGTAVVRVNQGEDVLIRTGSLSNDIILSDANGRSSFAGWILL*
LOC111104203	sC1q-like type 2	MCLTMATLFLVLVFGFFVFNSSADKHVFAESEENWDDSPDWKQAVRKIKKLENLVKIQNERISILEERPNLSEWKSIVELQETVQRQTDRIAKLETRVSELEVMVRNEETETIHKETPGEFSDTKLSTFIPKNFIRKGRLLLQPTTVPAESVAFFAYFSTDNSASSPHHILVFDKVITNIGNAYHAHMGTFIAPRSGVYVFIWTVRMALDHYHTTELVHDNNVINSIYLNPGGTIQGTVTGTAVVHVNQGEDVLIRTGTLSNSDILSDSNGRSSFAGWILM*
LOC111104409	sC1q-like type 2	MDFTVCLLFGVILTNGCYGLQEESGLPEDPIISLQAQIDFLMQKVSDLSRTSALQKVEIDDLKKENRNLLQFLSEVKSPQQHSQKIPDNLYVYEEEKTFDGNKATDIQSVIRKERLLLPLPQTTPSPPKENVVAFYAYMSGDFLNPGGYQTLIYDTVITNEGNGYHSTTGNFIAPQTGFYVFSWTMRLANGEYHQAELVHNHKVMGVAYLYAPTGDHMVSDVVCFHVNQGDDVFVRTQGGANHGNIESGYGGRSSFTGWKLN*
LOC111104522	sC1q-like type 2	MALLYIVPSCMFFILNISVNNYAAAGIIENFDNNIDWKMAVEKINQLEKMVKEQDKRIFALEKRPTESEWRSLTEELRKQNDRIAHLETKISKLEIPMEDKENKSIREGLSPEVSKYAGNALSSEPGIPSKKRLLLQPTTVPVEMIAFFAYFSSNHLISDAAYILAFDTVITNVGNAYHPHSGTFIAPRSGLYVFTWTIRQSGTNYHTTELTVNNKIVNVIHLNPGNTIDGTGTGTVVVHVNQGDDVLVRTGSNYNNGYIFSSEFGRSSFAGWILN*
LOC111104854	sC1q-like type 2	MQLTLFFVAIHVLISTVLSSHDDLISLKNNVLKLEHDLARQRTINREIRKGLYQTRKSRAANCSASPIVFQARLASTIYPLGANQIIAYDSIVTNEGNAYDTLTGMFEATVTGLYQFMATMWSAEGQNVDFQMIYNGNEVCAGRTTTTNQSMGICSAILQIPTGGRVFVRHKGTGGNYALGGNYAEFAGHLIM*
LOC111104819	sC1q-like type 2	MASQNIFLACMYLALNFSVYKYAAAGSTEIFDENPNWKMAVEKISQLEKLVKEQDKRISALEKGPTESELRSLTEELQNQSDRIVRLEARILKLEDPSEDETNELANQESSVQVSELIGKTLNSRQDFPQKKRLLLQPTTLPIEKVAFYAYFSSDMPTSGAAHHILNFETVITNVGNAYFPHSGTFIAPRSGIYVFTWTIRQQGNNYHTTELLVNNKVVNSMHLNPASTIDGSGTGTAVVQINERDDVFVRTGSSHNYGSIISSGFGRSSFAGWILS*
LOC111105276	other/uncertain	MRKDKAFHWNTLQKDETCQGIFHFYRESPFLMKGCVGDYNDTYIQNLSDKLQHLEIAIDKEIQETENLVGLITHDQVQKRSAQNCDIVGFHALLTTTSVSMSSGEVIKFNHVITNIGEGYNSSTGIFTAPVTGYYEFIVTIMAQSGNTFISKVLIHGTDYYCHAYGSSQSQAQGMCDIIFHLSSGQTAKVAQHSGSALYGNSFSSFSGHLIG*
LOC111104763	sC1q-like type 2	MASLCMVLVGILYFSLCQCLLFSSTENIGDNLDWKVASRKILELEKLVKDQNDRISALEKRQPEAELKSQTEFIQKQNARISQLEARILELEAEGNANPVESSHLESHERVSESKQNDISSKRSSIRKSRLILQPTTLTVPTAPNEEVAFFAYFSSNLVTSGANHFILAFDNVITNVGNGYHHNSGTFIVPRSGLYVFTWTIRLNLGNRHTTELVVNNNVVNSIHLNPQSNIDGTCTGTAVVHVYQGDDVLVRTGSNYNSGFITSDAFGRSSFAGWMLH*
LOC111104206	sC1q-like type 2	MATPFLVSAFGFFILNFSPEKHVFAQPNENWDDSPNWNLAVEKIKELENLVKIQDERISVLEKRPTMSELRSNVELQETIQRQNDRIVKLETRISELEVMVTDQKAEAIHIEPSEEVPDFGQNIITPEKNFIRKERLLLQPTTVPVETVAFFAYFSTLNVASSPHQILAFDKVITNIGNAYHPHSGSFLAPRSGVYVFIWTIRLEGNNYHGTELLHDNNIINSIYLNPGNVIGGTATGTAVVHVNQGEDVLVRTGDISNGGILSDTNGRSSFAGWSLM*
LOC111105398	sC1q-like type 2	MESSHTISIRIFFVFIFWTYSSVKADLNENRDENTDWKWAVKTIQELEQKVKVQDERIATLEKRPTGSDWTSMVDLKKTIQKQNDRIIMLEDRIYELEATSEVENNDSIKESSPLREIIPHSEKQTDQAKSSPVRKGRLLIQPTTVPFDRVAFYAYFSSDILASMDNYILPFNTVVTNVGNAYHPHSGTFIAPRSGLYVFTWTIRAYGSRYHSTQLLVDNNVINTIYINPNSVIDGSVTGTAVVHVDQGDDVFIRTFPPNSGEIISGNNGRSSFCGWSLM*
LOC111104339	other/uncertain	MVDLKKTIQKQNDRIIMLEARIYELEATSEVENNDSIKESSPLREIIPHSEKQTDQAKSSPVRKGRLLIQPTTVPFDRVAFYAYFSSDILASMDNYILPFNTVVTNVGNAYHPHSGTFIAPRSGLYVFTWTIRAYGSRYHSTQLLVDNNVINSISINPNRVIDGSVTGTAVVHVDQGDDVFIRTFPANSGEIISGNDGRSSFCGWSLM*
LOC111105005	sghC1q	MWNILVHLIAGYVSNNNVSTRIGFTVSATSPSNTWNSGTLVFPKVITNVGNGYNPSDGVFTAPMAGGIRLLVNIQSYDTLAIYVDMVFIGTPKVRTMAETSLNDHDDAGPNLAVLSLKTGDRVWIKHNARAGYYTFSDGPVTTFSAFPI*
LOC111104291	sC1q-like type 2	MALLKNATIYVLFVLTFYPNKFVSADTNENMYANRDLILEMKKIKELETLVIFQNKRIAALEKHFTDLKWASKTDLGTIVRKQNDQIDQFKGRIHKLEIMLEVHENVSVRTNMSKSDENYINTDISLIKEACTSPQQRKFPRKRVAFFAYLSSRTPDLTAYKTLTFDTVITNVGNAYNPKAGVFIAPQSGLYVFTWTIRINRNNYHPTELVVDNKIVNSIYLNPHNTVDSSVSSTSVVNVKKSSKVLIRTSSADNNGYIFSDDYGRSSFAGWKLM*
LOC111105226	sghC1q	MKAAVLCIVVALICEISDGLDMMQILEELKRVEPIIREIYERKWVMFTAGLTTPSSTWENRILIFDTVILNVGDGYNSSTGVFCAPSDGMYFFGVCSNQNLGLDIVLNDVSKVQLHAHSPEVHQFGMNVGWLILQKGDHVWVKHTYGKSYWTDEVPMISFLGVLI*
LOC111104379	sC1q-like type 2	MCSKQLLFALCVALIYKIVFVASSPVTKETLEKQYSRLSEKLKKNSKTLEDLFIQFRRKSRSVASPVAFFAILNRYYSSMSPHQVIPFEYAPTIVGNGYDHHFGLFQAPVSGYYQFVLTCQAVPNSYMVNLEMVKNGDMLCRAHAATYGQEGYCVAMVHLDKGDDVWVRHYNGQGINLYDGQKVPSFSGHLIKAT*
LOC111102863	sC1q-like type 2	MALLKDATIYVLFVLTFSPNKFVSADTNEKMYANRDLNLEMKKIKELDKLVTFQNKRISELEKHFTDLNPERVSNPDLGTIVRKQNDQIDQLKGRIYELEILLGVHENESVRTKLHEDVSESDENYINTDRSLIKEAFTSPQQRKFPRKRVAFFAYLSSRTPDLTAYKTLTFDTVITNVGNAYNPQSGVFIAPQSGLYVFTWTIRINRNNYHPTELVVDNKIISSIYLNPRNTVDSSVSSTSVVNVKKSSKVLIRTSSADNNGYIFSDDYGRSSFAGWKLM*
LOC111104378	sC1q-like type 2	MMVYLQFFGSVVCLLITVCSGYYSNTEIQNLSGKLQQLEIAIDKEIQETENLVGLITHDQVQKRSAQNCDIVGFHALLTTTSVSMSSGEVIKFNHVITNIGGGYNSSTGIFTAPVTGYYEFIVTIMAQSGNAFVSQVLLQGTDYYCRAYGSSQSQAQGMCDMIHYLSSGQTAKVAQHSGSALYGNSFSSFSGHLIG*
LOC111104241	sC1q-like type 2	MMKVCILLLIFKTVEASSLLTDQPSQNKTLSIHLTNRSSVEEIDHLQQQLNQETIIRLSLTKQLYSLVSDVIAMKTAMAKMESRLQKCEQLINPARSTNDDTELKISRIQRDLENLTSDCFNAKLDKDTVVFNAVVTKNGQFEINTPVNIIYDQVLYDTHNAYSNQTGAFTAPMDGLYVFTWSTLVAAKKILDAELLVNGIRKGLGNCNNVDNNGLENCSNTVPVLLKAGDEVSIRSTAGNYIHGHEWSSFKGWRT*
LOC111102389	sghC1q	MKLIVGIILYCLFPYVRGKQSTQQKKLESLKSLIFNNAKATVTLNSTDLKQLLSLSTPTLGKANTAYSGRKIGFYVTLKSDMNYGKLQTVKFDNIFVNDENDSTCVFTCPAAGTYMFVVDVLLNKHTQLSLRLNKTSVARLYRDSSYSPHVQVSKTILLKLKQGDHVNVVSEYNNVFINGYLYSGFTGTFLY*
LOC111104703	sghC1q	MKGLVFAVVILFCHYADSYQTLQCVAQNRGPPLVAFYAYMSRNFKALSIGQPFKFDAVETNLGKGYDRKTGVFTAPSAGVYAFSWTIHAAGSHVAGSTGSFGEMAAVLTQNGVIKGSIYADTEKQYDDASATGFVILSVLRGDKFQIVCPMVGQGAFYSNRINGKTTFAGYRIA*
LOC111102900	sC1q-like type 2	MMKVCILLLIFPITVMAKTVEASSLLTDQPSQNKTLSIHLTNRSSVEEIDHLQQQLNQETIIRLSLTKQLYSLVSDVIAMKTAMAKMESRLQKCEQHINPARSTNDDTELKLSRIQRDLENLTSDCFNAKLDKDTVVFNAVVTKIGQFEINTPVNIIYDQVLYDTHNAYSNQTGAFTAPMDGLYVFTWSTLVAAKKILDAELLVNGIRKGLGNCNNVDNNGLENCSNTVPVLLKAGDEVSIRSTTGNYIHGDGWSSFKGWRT*
LOC111102407	sC1q-like type 2	MKQLFKIVWFVAVSFMIGGKVSAYSLADRSDVSNSSEEYGYYNIYDKIDSMQKAFQTLETNVQRKNNILRQVLQSITEMDDSIEMSDQSSQGTTTIQPMQNKATGVGFTTKLESETYMSSSSIIRGSPILYNGGNAYNGTVFTCPSPGLYLFHVSLITSTKETGIWIYKNSQQLTFAYANTAKSDFHCSSVSAAIWLDAGDQVYLRPHKSSLQVDPYSVFTGVKVN*
LOC111105284	sC1q-like type 2	MVCPRKIVFLVTNLMHVVISQSIITDHETLCKSLETVNEIGSLKQQIAKQASLINDVILMKKELNSKVQQIERNTNDISDIQKNLQYLSSKFTTSQDKVAFNAVRNTFLNRTADITEFSVVYDAVLYDTHNAYNKQTGVFKAPSSGLYIFTWTSGVASNKTFNSELLLNGRRMGLSGCNNQNNLGYENCANTIPLLLQSGDSVHVRMTNGNYLFGNHWSSFKGWKN*
LOC111102453	other/uncertain	MTSLIGFGLCSSLSLIVHLVDAYDQSFALCANQKGFIRCEKGSKITVISAVYGRTDNKVCPHGNTKTCRSLTSELKIKISCNGYRTCYLHASDEIFGNPCINFSKYMEVTYSCVKYSNRKDPIAFNVYNSKRLTMGRNTPTNVVYDAVYYNHGNAYNPVSGFFTAPSPGLYVFTWTSCVASKKIFDAEILVNGNRKALGGCNNEGGSGNENCANTVPLVLETGDKVNIRTVVADYLHGGGWSSFKGWKVY*
LOC111102386	sC1q-like type 2	MVQYYQLIILWTLVFVISAKSNLTDLADKSSLRATENEISHLKQQLNQESSIRLALANQLYTLNSDMIDVKKRMDAISREGRQFEDMLEDMQRKIRLLGTENQNLRTEPEPVPRTKQVSNATGDTVRGDSALAAIANSQDEVVAFSAYLTDTLLFQNRSTDVVYDTTVLNTANVYDSSTGYFTAPSSGLYVFSWTSMVHSETAFNAELVVNGERKGLGNCNNHLGSGIENCANTFPVILAAGDRVNIRTVNANYLQGYRWSSFQGWKVR*
LOC111103100	sghC1q	MPSVIGFGLCSSLILFLISTVPCVDAHDPIAFNAYNKQHLTMEKNTPTNVVYDAVYYNHGNAYNPVSGFFTAPSSGLYVFTWSSCVASKKVFDAEILVNGNRKGKGNCNNENGSWYENCANTVPLVLWTGDKVNIRTTKADYLEGGEWSSFKGWKVY*
LOC111103101	sghC1q	MPSVIGFGLCSSLILFLISTVPCVDAHDPIAFNAYNKQHLTMEKNTPTNVVYDAVYYNHGNAYNPVSGFFTAPSSGLYVFTWSSCVASKKVFDAEILVNGNRKGKGNCNNENGSWYENCANTVPLVLWTGDKVNIRTTKADYLEGGEWSSFKGWKVY*
LOC111103102	sghC1q	MPSVIGFGLCSSLILFLISTVPCVDAHDPIAFNAYNKQHLTMEKNTPTNVVYDAVYYNHGNAYNPVSGFFTAPSSGLYVFTWSSCVASKKVFDAEILVNGNRKGKGNCNNENGSWYENCANTVPLVLWTGDKVNIRTTKADYLEGGEWSSFKGWKVY*
LOC111102473	other/uncertain	MTFLIGLALCRLIQISTFSCVYANDLSFALCADQKGFIHCEKGTKIRVKSAIYGRTDNKVCPGGNTNTRTCRSLTSEMKVKWNCNGYRTCHLHASNQIFGNPCKYVSKYLQVTYGCVKNPDGKDQIAFNAYNTATLSIDTNTHFNVVYNAVYYNHGNAYNPVSGFFTAPSPGLYVFTWASVVAPKKTFDAEILVNGKRKGLGNCYNGGGSGFENCSNTVPLILATGDKVNIRTDVADYLHGGGWSNFKGWKVY*
LOC111105171	sghC1q	MEKTRKAAVGVIVVVFLNICEYSEEKDTKLLEEFKNNYSTVNEACKAVGYVKSTCNKKDRKQKVAFTAAVTKASTTWNSGILIFNIGDRYYKSTGVFTVPMAGTYVFYASANEYASQEIGLDITLKSVSKVRLVGYNSAAHQTGTNMVVLTFQRGDRVWVKHAFVKKILMPSSTL*
LOC111104612	other/uncertain	MRAPSTGLYIFCWSIALHVNYIGNTNLVINGSTFHMVHCQKTFQHCGSTVTVWLSKNNQRSEMTSTNLLCVTMCLSILIGSFDQIKAGKLNLMSNLMKQADTLKHGLDLASQVGNIGSSNLDVAFTAVPSSSTSYSSGSTIAFNRLKTNIGNAFSTSNYRFTAPSSGLYVFHWSLALNSSYYGQSRLMINGNTFHTVHCQKTYQQCGSTVTAWLNKNDQVWVASAYSSIYAYGTYSSFSGWKVH*
LOC111105608	other/uncertain	MTFLIGLALCSLIQISTFSCAYANDLSFALCADQKGFIHCEKGSKIRVKSAVYGRTDNKVCPGGNTNTRTCRSLTSEMKVKWSCNGYRTCHLHASSQIFGNPCMNVSKYLQVTYGCVKNPDGKDPIAFNAYNTDNLRIDRNTHFNVVYNAVHYNYGNAYNPVSGFFTAPSPGLYVFTWASVVAPKKTFDAEILVNGKRKGLGNCYNVGGSGFENCSNTVPLILATGDKVNIRTDVADYLHGGGWSNFKGWKVY*
LOC111105382	other/uncertain	MSSKGKQNFEKEDENTGITVKESQSLNTTSHANDRDESRLSHNKCQQTDSVYKPPESTDVLASGVVFWKDPKFWIQIGIIGVIQLVICVYMSVSWKRDTENLISCRHGEAASESSCEDCFCDAACKLSQRDVLNFASQNDFENLLDVDWDRRKKVLEKDFNRKFKDLFDEEWDTRKKILEEDLSRKLEDKETVVFNAVVTKHGHFERNTPVNIIYDQVLYDTHNAYSNQTRAFTAPMDGLYVFTWTTLVEAKKILNTELLVNRIRTGLGSCDNEGNNGYENCSNTIPVLLKAGDEVSIRSTTGNYIYGSTWSSFKGWRT*
LOC111104857	sghC1q	MASFHLLGVALCLFALMGSFDSVKARKLNLMSNLMKQADTLKHGLDLASQVGDIGSSSLNVAFTAVPSSSYSYSSGTTIKFSQLRTNIGNAFSTSNYRFTAPSSGLYVFHWSLSLSSSYYGNTNLKINGSTFHKTYCRKTYQQCGSTVTVWLSKSDQVWVESAYSSVYARAYYSSFSGWRLH*
LOC111104452	sghC1q	MSAIPRHIVLCVFVLGSLGLVQGRGLLANLMKQADALKHGLDLASKVGDIGSHRNEVAFTVVPSSSTTYSSGSTIAFNTVKTNHGNAFNRGNYRFTAPSTGLYVFSWSIATHSSYIGNSRLMVNGSIFHQLNCQKTYQQCGSTVTVWLSKNSQVWVASAYSSIYVYSTYSSFSGWKIH*
LOC111104495	sghC1q	MSAFPRHIVLCVFVLGSLGLVEGRGLLANLMKQADALKHGLDLASKVGDIGSHRNEVAFTVVPSRSTTYSSGTTIAFNTVKTNHGNAFNRGNYRFTAPSTGLYVFSWSIATHSSYLGNSRLIVNGSTFHEVHCQKTYQQCGSTVTVWLSKNSQVWVASAYSSIYVYGTFSSFSGWKIH*
LOC111102471	other/uncertain	MLHGNTNTRTCRSLTSEMKVKWSCNGYRTCHLHASNEIFGNPCINVSKYLEVTYDCVKDPEENMKDKCFKSSGKQIVAFNAYTSKHLTLNRRTPINVVYDALYYNHGNAYNPVSGVFTAPSHGLYLFSWASNVAPRNVFDAEILVNGKRKGKGNCNNIDNPGYENCANTVPLVLETGDKVNIRTIVADYLHGGGWSSFTGWRVF*
LOC111105483	sC1q-like type 2	MLHFLNFVWCVAFVFIIGEKGSAYSLAVSNGSEEYGYYNIYNKIDSMQKAFQTLETNVQRKNNMLRQILQPITKMDDNIEMSDQSSQVTKTVQPLQKNDTAVGFTTRLQQTTYSSSSSIIQGSPILYNGGNAYNGTVFTCPSPGLYLFHVSVLTSTKSGGIWIYKNSQQLTLAFAGNGDPQWNGASVSAATWLDVGDQVYLRPYSSTLYTDGNSAFTGVKIN*
LOC111103735	sghC1q	MSNQVFHSFETLGLSRIIVFTLLTFSDQSFALCANQKGFIRCENGSKIRVKSAVYGRTDNKICPHGNTNTRTCRSLTSEMMVKWSCNGYSTCHLHASNEIFGNPCINVSKFLNI**ISKTLFSDKCFKSSGKQIVAFNAYTSKHLTLNRRTPINVVYDALYYNHGNAYNPVSGVFTAPSHGLYLFSWASNVAPKNVFDAEILVNGKRKGKGNCNNIDNPGYENCANTVPLVLETGDKVNIRTIVADYLHGGGWSSFTGWRVF*
LOC111102363	sC1q-like type 2	MMHFFNLLWFVAFVFMIGEKGSAYSLAVSNSSEEYVYYNIYNKIDSMQKAFQTLETNVQRKNNMLRQILQPITEMDDNIKMSDQSSQVTKTVQPLQKNDAAVGFTTKLQSATYSSTSSIIRGGLILYNGGNAYNGTVFTCPSPGLYLFHVSVLTNTERGGIWIYMNSQQLTLAHAGTGAPQWNGASVSAAVWLNVGDQVYLRSYGSTLRLDSNSAFTGVKIN*
LOC111102355	other/uncertain	MPLVIDLCLYSLILISTLPCIDAYDQSFALCANQKGFISCKKGTKIRIISAFYGRTNKNVCPYGNTNTRFCRSRTAEMKVKWICNGYKTCHLHASDQIFGNPCASVLKYLEVTYGCVKDPNEILKDPIAFNAYKNGHLRMDINTPINVVYDAVYYNYWNAYNPVSGFFTAPSPGLYVFTWTSCVAPKKIFDAEILVNGKRKGMGNCNNVGGSGFENCATTVPLVLETGDKVNIRTVVANYLNGDGWSSFKGWKVY*
LOC111104846	sC1q-like type 2	MGSTTNMAPFLKYLIFTAVCLLIGGSCGEHSLDRRANVVKRSDNDTYYNIYTKINTLEKYVSNLETKLQTRTKLLRQVLKSVLELDSNLGLPKKNLKKENIQASKKNAVGFTTKLPTTTYRSTSSIIRGSPILYNGGNAYNGTVFTCPSPGLYFFHVSLLSNTKDGGIYIYKNSQQLTLAYAGHYPQWNGASVSAATWLDVGDQVYLRPFSSSLYVDRNSAFTGVKIN*
LOC111105386	sC1q-like type 2	MMHFFNLLWFVAFVFMIGEKGSAYSLAVSNSSEEYGYYNIYNKIDSMQKAFQTLETNVQRKNNMLRQILQPITEMDDNIKMSDQSSQVTKTVQPLQKNDTFVGFTTKLPTTTYSSTSSNIRGRENSILYNGGNAYNGTVFTCPSPGLYLFHVSMLTNTKSGGIWIYKNSQQLTLAFAGSDPQWNGASVSAATWLDVGDQVYLRPYSSTLYIDGNSAFTGVKIN*
LOC111105012	sC1q-like type 2	MMLIFLSLLISTFARAPAFSSLLTDAENKTSTTLEGKHAWNDVDFLRQMINQETVIRLSLVKNVQALVSDVNLMKKSITTSEMTISALQQTIETLNIRVDSLEEENKRLKESSVDYQESIHDLETTLEAVNVSVNYLYENLNTSQKQNDEKRQDIVNKTNRVLEDIKVEVRYLSVTLFDFKDHTATKDDINNQKLLDIERVFNTSFEELQAGNLDVKIQFNEIKDNVHGLEEVILEYQKAMTENLTTTIADVDTQIRKSEYERLKLSAAVSSLETFRLNMTKSSCDKNINTAFSAGISTNDDNWTGSTLVFPDVIYSEGKGYDSNTGVFTAPTEGTYLFYISIQSAFQKYSHFDVVLNGSPKILLEIAQTCPTRQKLFVKLIKDIPATNIFTNINLEFK…

## Sheet: Chr8
Gene	Type	Protein Sequence
LOC111110657	smultiC1q	MYYMYFCDLIRRPVSKEGDRMLVSLAILLVVPFVVQCQDPGNTQTPTAFTKGQTTNLHLTKGEKIPFNKRITEFGATFDAEGAFVCQTPGLYSFTFYGLTEQNWELWLEMMKNDQLIASIYAYTYADYADAGNAAILHLNVGDKVYLKAHDDYDQTLFGQGDQVYTTFTGELLFADNVELDAINAYGAVGFSAVMTVNASISDGSAVIYDTAHTNVGSGYDTTSGTFTAPVEGTYVFHFHALSHADEEAWIELFHNDQYVVASYGYTSGSYADSGNSVVLHLKKGDRINVKARPGTDVKLYGDSDEYYTTFCGALLSPTVHGSGSGHSTQQEVAFSVGLTHNEASTNGPKVVFDRVFVNLGQDFNVNTGVFTASVGGLYAFHYHALAQSGQEVWVELYH…
LOC111110397	smultiC1q	MKILFHLILIVGSYSLSFENKTEIHDGSSKVSTVLNEILNRESLVRLSMVQKMQTLMLGAVEAKQRDETLKKNLENIEKELQAIKDGHEKYREENQKVQENLRNDIRQLQEIQAGAIDDLKNIYWNFSLIVNETCKSEQDAQLQKIQSQLQSGLRKEIPGNYAFYAQLTTSTTDNNVIFEHVITNEGSAYNGKTGIFTCKYSGPYAFSWTIATSGHRYTEAELLVNDEVIGSSGTDTRPSSDTADSSTGFVVCNLQIGDKVRVAINGTADGIYSTFSGWRIGENYSSFYAKAISTLNKPSSSLRGFPFQSVVVNNGYVYDSYNGTFTCPTAGLYAFVCTVESRNGNSFPVYFYRGGSKLNDIPIQPDASSGDYVDTSSTLQIFSLSRGDNIYLSSTDSN…
LOC111106700	smultiC1q	MKILLHLIFIVGSYSLSTEKKEENHDGSSKVSTVLNEILNRESLVRLSMVQKMQTLMLGDVEAKQRDETLKENLENIEKELQAIRDGHEKYREENQKVQENLRNDIRQLQEIQAGAIDDLKNIYWNFSLIVNETCKSEQVQKIQSQLQSGLLKEIPGNYAFYAQLTTSTSDNDVIFEDVITNEGSAYNGNTGIFTCKYSDSYAFSWTIATSNHRYTEAELIVNDEVIGSSGTDSRSHSDTADSSTGFVVCNLKIGDKVRVAINGTADGIYSTFSGWRIGENYSSFYAKATSTLYKPFSSSHGLPFQSVVVNNGYVYDSDNGTFTCPTDGLYVFVCTFEARDGKGFPVYFHHEGSKLSAIPIQPDASSGKYADTSSTLQIFSMSRGDEIYLYPTDSDSAI…
LOC111106019	smultiC1q	MIRLLCLVYVLVMVLFYCAEGSGLKCLRCDDILEPRFCERIEYCQDGDVCGVQKYRKENGDVSFWSGCLPTLSCSGVTNKTVLQPSKRSIHGFVLCQECCHGDLCNADGCGAPSFPTSRGPLCFNCAHTLNPSDCHHVTICGANELCFLGEKPMFGQRYFTSHCEDVHACKNHVSDPLIFGRKRGLRGQRSYTPCSGCCQGDLCNINCNATFTPDTVINTGSTVGPMPTSTVTSETPGNYAFYAQLTSSTSRHDVIFSNVTTNEGSAYDGSMGIFTCKYSGSYAFSWTIATSSQRHTDAYLLVNEVAIGSSYTDSRGSSVTADTSTGFVVYNLKVGDKVRVAINGTADGTYSTFSGWRLQYSNSSFYAKAMSSLTRPTSSNYGFPFQSVVDNGNIYDSN…
LOC111108471	sC1q-like type 2	MKMNFLLFFYVVVRAISAELVAESSLLTGNACPKLSTVLQEILNRESLLRFTMTQKVLNLMVDVADSKKEDALISEKLKRLSTEIQALKADNQKQREEISNLNQKIGELQTSQMEGKTKLLSHLEDYQTFSLTVNETLQSIQENQSAGYITLMDVKNKSGMLITNLKDGVKELKVETRNQAEDVKEAKNLLMKIKVQSVDELVRNLTNVAENMQQLENENKKQNTEINGLEKEHTNFKKDILQIQTQQSDGNNDVLLLKESHLKLSNAVNETLTDIWQNLTGNDNQLRDKIARLHPVEITGNYAFYSQLSTSITNGYVVFNNCKTNEGSAYDEMTGIFTCKYSGTYAFSWTIATSGHRYTEAELLVNDEVIGSSGTDSRPSRDTADTSTGFVACNLGVG…
LOC111106402	smultiC1q	MKMIFLLIFYLVVRAISVELVAESSLLTGNACPKLSTVMQEILKVLNLIVDGADSKKRDALFSNFQSVISEIQTIKADNQKQREVISNLNQKIGELQTSQMEGKTKLLSHLEDYQTFSLTVNETLQSIQENQSAGYKTLMDVQKKSGMLINNLKDGVKELKVETRNQAEDVKEAKNLLMKIKVQSVDELVRNLTNVTENMQQQQQQLENENKKQNTEINGLEKEHIDFKKDLLQIQTQQSDGNNDVLLLKESHLKLSNAVNETLTEIWQNLTANDNQLRDKIARLYLAEIPGNYAFYSQLSTSITNGYVVFNNCKTNEGSAYDEMTGIFTCKYSGTYAFSWTIATSGHRYTEAELLVNDEVIGSSGTDSRPSRDTADSSTGFVACNLGVGDKVRIRVNG…
LOC111106701	smultiC1q	MKMIFLLIFYLVVRAISVELVAESSLLTGNACPKLSTVMQEILKVLNLMVDGADSKKRDALFSNFQSVISEIQTIKADNKKQREVISNLNQKIGELQTSQMEGKTKLLSHLEDYQTFSLTVNETLQSIQENQSAGYKTLMDVQNKSGMLINNLKDGVKELKVETRNQAEDVKEAKNLLMKIKVQSVDELVRNLTNVTENMQQQQQQLENENKKQNTEINGLEKEHIDFKKDLLQIQTQQSDGNNDVLLLKESHLKLSNAVNETLTEIWQNLTANDNQLRDKIARLYLAEIPGNYAFYSQLSTSITNGYVVFNNCKTNEGSAYDEMTGIFTCKYSGTYAFSWTIATSGHRYTEAELLVNDEVIGSSGTDSRPSRDTADSSTGFVACNLGVGDKVRIRVNG…
LOC111108472	smultiC1q	MRTKHVLFLFIIIGAISFSKENETENSLLTGDTSQKVSRVLQEILNRESLVRFSMTQKIQVLMLDAAESKKKTDMLFEKFQTVTREIQSLKDENQKQSEEISHLREGQVNLNKIIYQFQTNQSDGRTELQSHREDYHKFALLVNETLKDLQYNQSSANIRLMDFKEQSGILMNNLRSSTKELEVENQKQKEDITEVMNTLKNLSLQSDLIKKNLSSVTDGVKTLELKNQRQNKQVLELKEDHTNLGEDIQRLQTKQVDGDSDVLSLKESYLKFSVLVNETLEHFWQNQSANDDQLRDTNGQREIPGNYAFYSELSTSISNAYGYVVFKNCKTNEGSAYDEMTGIFTCKYSGTYAFSWTIATSGHRYTEAELLVNDEVIGSSGTDSRPSSDTADSSTGFV…
LOC111106401	smultiC1q	MKMIFLLIFYLVVRAISVELVAESSLLTGNACPKLSTVMQEILKVLNLIVDGADSKKRDALFSNFQSVISEIQTIKADNQKQREVISNLNQKIGELQTSQMEGKTKLLSHLEDYQTFSLTVNETLQSIQENQSAGYKTLMDVQKKSGMLINNLKDGVKELKVETRNQAEDVKEAKNLLMKIKVQSVDELVRNLTNVTENMQQQQQQLENENKKQNTEINGLEKEHIDFKKDLLQIQTQQSDGNNDVLLLKESHLKLSNAVNETLTEIWQNLTANDNQLRDKIARLYLAEIPGNYAFYSQLSTSITNGYVVFNNCKTNEGSAYDEMTGIFTCKYSGTYAFSWTIATSGHRYTEAELLVNDEVIGSSGTDSRPSRDTADSSTGFVACNLGVGDKVRIRVNG…
LOC111106404	smultiC1q	MKMIFLLIFYLVVRAISAELVAESSLLTGNACPKLSTVMQEILKVLNLMVDGADSKKRDALFSNFQSVISEIQTIKADNQKQREEISNLNQKIGELQTSQMEGKTKLLSHLEDCQTFSLTVNETLQSIQENQSAGYIKLMDVKNKSGMLINNLKDGVNELKVENRNQAEDITEAKNLLMKIELQSDELIRNLTNVAEDMQQLENENKKQNTEINGLEKEHTDFKKDLLQIQTQQSDGNNDVLLLKESHLKLSNAINETLTDIWQNLTANDNQLRDKIARLYQAEIPGNYAFYSQLSTSITNGYVVFDNCKTNEGSAYDEMTGIFTCKYSGTYAFSWTIATSGHRYTEAELLVNDEVIGSSGTDSRPSFDTADSSTGFVACNLGVGDKVRIRVNGTADGN…
LOC111108409	smultiC1q	MKMKFLLFFYVVVRAISAELVAESSLLTGNACPKLSTVLQEILNRESLLRFTMTQKVLNLMVDVADSKKEDALISEKLQKLSKEIQALKADNQIQREEISNLNRKIGELQTSQMEGKTKLLSHLDDYQTFSLTVNETLQSIQENQSAGYIKLMDVTNKSGMLINNLKDGVKELKLENHKQAENVSEVKNLLMKIKLQSVDELVRNLTNVAENMQQLEDENKKQNTEINGLEKEHTNFKKDILQIQTQQSDGNNDVLLLKESHLKLFNAVNETLTDIWHNLTANDNQLRDKIARLYPAEIPGNYAFYSELSTSITNGYVVFNNCKTNEGSAYDEMTGIFTCKYSGTYAFSWTIATSGHRYTEAELLVNDEVIGSSGTDSRPSRDTADSSTGFVACNLGVG…
LOC111106205	smultiC1q	MKRKFLLFFYVVVRAISAELVAERSLQIGNTYANLSTVLQEILNRESILQLSMTQRILKLTADSKRKDALFSKMFQSINTEIQTLKADNQKQREEISNLNQRIRELQTSQKERETKLLSHLEDYQTFSLTINETLQIIEENQSAGYIKLMDVRNKSGMLINNLKDDVNGLEKEFTDFKKDLLQLQAKQSDGDNAVNETLADIWQNLIAYDNQLRDKIIRLPPEIPGNYAFYSELSTSISNGYVVFKNCKTNEGSAYDEMTGIFTCKYSGTYAFSWTIATSGHRYTEAELLVNDEVIGSSGTDSRPSRDTADSSTGFVACNLGVGDKVRIRVNGTADGNYSTFSGWRLPDGKSSLYARAMSQLNRVSTYSRGYPFQSVINNGNHYDSYKAIYTCPEDGLY…
LOC111106400	smultiC1q	MKMTFLLFFYVVVRAISAELVAESSLLTGNACPKLSTVLQEILNRESLLRFTMTQKVLNLMVDVADSKKEDALISEKLQRLSTEIQALKADNQIQREEISNLNQKIGELQTSQIEGKTKLLSHLEDYQTFSLTVNETLQSIQENQSAGYIKLMDVTNKSGMLINNLKDGVKELKVENHKQVENVSEVKNLLMKIKLQSDELVINLTNVAENMQQLENENKKQNTEINGLEKEHTNFKKDILQIQTQQSDGNNDVLLLKESHLKLSNAVNETLTDILKNLTANDNQLRDKIARLYLADFAFYSQLSTSITNGYVVFNNCKTNEGSAYNEMTGIFTCKYSGTYAFSWTIATSGHRYTEAELLVNDEVIGSSGTDSRPSRDTADSSTGFVACNLGVGDRVRI…
LOC111106789	smultiC1q	MRTKHVLFLFIIIGAISFSKENETENSLLTGDTSQKVSRVLQEILNQESLVRFSMTQKIQVLMLDAADSKKKTDMLFEKFQTVTREIQSLKDENQKQSEEISHLREGQVNLNKIIYQLQTNQSDGRTELQSHRQDYHKFALSVNETLKDLQYNQSSANIRLMDFKEQSGILMNNLRSFTKELEVENQKQKEDITEVKNTLNNLSLQSDMIKQNLSSVRDGMKTLELKNQRQNKQVLELKEDHTNLSEDIQRLQTKQVDGESDVLSLKESYLQFSVLVNETLEHFWQNQSANDDQLRNTNGQTEIPGNYAFYSELSTSISNRYVVFKNCKTNEGSAYDEMTGIFTCKYSGTYAFSWTIATSGHRYTEAELLVNDEVIGLSGTDSRPSSDTADSSTGFVAC…
LOC111106811	smultiC1q	MMGLKCSVLLLIFLSSLVKSQTIYDQLNEHTHKDCDISSIQQELRKGFIDLQQKVDNLQSPPTETFTINYAFHAQLTSTVINDYVIYDNVLTNEGAAYDKTTGIFTCKSSGTYVFSWTTADSNFRETRADLLVNEISVGVTNIYRRQYYYSWTEVVGSSTGLVAYNLQTGDEVKVKVNGRADALFSTFSGWQLHQGAPSFYARVSLSDSQSNGSETRFHNVLNNNKDMYNPETNTFTAQESGLYAFTASVEVTDGHAYFRAKRGEVKDELNFFPWYRRRANLPSSVLNSYPSRGFPGTASTLQLLALWRGDNVYWHSSFNVTLAPFTTTASGWFIGPFDTRPAFMASLESSSSSSPVNFTNEYLDMTASLSGSEFRAPKAGVYVIFWTAGHYINPLHSM…
LOC111109200	other/uncertain	MVFCEPACCNYDKIISKSKYAYALSPSRSSDTRFNYAFHAQLTSTVINDYVIYDNVLTNESAAYDNTTGIFTCKSSGTYVFSWTTANSNCRASRADLLVNEISIGVTNTHRRHCYSWSENVGSSTGFVAYNLQPGDEVKVKVNGTADTLFSTLSGWQLHQGAPSFYARVSLSDSQSNGSEIRFHNVLNNNKDMYNPETNTFTAQESGLYALTASVEVTDGQAYLSVKRGEVKDEMNFFPGYRERASLPSSVLNSYPLGGFPGTASTLQLVALWRVNARPACMASLETSSSSSPVNFTNERLDMTASLSGSEFRAPKAGVYVIFWNTGLYLNPRHSMLLVNEICVGHAISDRTDGSNVVILRLQKNDSVSLKIDATVYSHKSTVISGYWLF*
LOC111108194	sghC1q	MISKRLVSLCLILSTVDLSHQSKNTDAILTSLKNLVIDNSHTTVTLNSTALRTLIAISKAEKSNGQSNPAIGFTAGISKNIYLSDKETVKYDRVLTNIGNGYDKISGHFKAPIKGLYVFSCTVMAVERGDLSVVLVKNAQEMSHVYSSTGIYESGAISILLSLKKGDKVWIRRYGHGRTMNKDYSWFTGYLISTMI*
LOC111106373	sghC1q	MESALVLLLAFTTMVSGGGHETPQQVVTRYNNYKTICTGLGYQNVPCDAGNGEIAFQSTRTNHLQNLKNQQTVIFDKVSLNEGNAYNQKTGEFTATVGGVYSFNWKILTSTGKYFITEIVHNGNAIALNYCDGRGISTGYASTSNQAIIRMKKGDKVWIRTHGGHGIFANGGWCDFSGYKV*
LOC111110450	sghC1q	MIFKRLVSLYLIFSTVDSSHQSKNTDAILTSLKNLVIDNSHTTVTLNSTALRTLIAISKAGKSNGQSNPAIGFSAGISKDTYLGDDQAIKYDRVLTNVGNGYDKFSGHFTAPIEGLYVFSCTVMAEATGDLSVVLVKNGQRMSNVYSSGGNYDSGAISILLSLKKGDKVWIRRYEHGRTMNAEYNWFTGYLISTMI*
LOC111110295	sghC1q	MNSACVFLLTFTAVVSGGGHETPQQVVTRYNNYKTICTGLGYQNLQCKAGNDGGIVFQSSLTKILQNLQNQETVIYDKVWLNEGKAYNERTGKFTATVEGVYVFSWKTLSKPGKYFVSEIVHNGNAIAYSQCDGRGQDGYPSSSNQVNIKMKKGDQVWIRAQGNYGQYAHGGNWCSFSGFKI*
LOC111107894	sghC1q	MESAFVLLLTFATIVSGGGHETPQQVVTRYNNYKTICTGLGYKNVPCDAGNGEIAFQSTLTKNLQNMKYQETVIFDTVRLNEGNAYNQKTGEFTATTGGVYSFNWKIFTSSGKYFITEIVHNGNAIALNYCDGKGISTGYASTSNQAIIRMKKGDKVWIRTHGGNGIFANGGEWCDFSGYKV*
LOC111110553	sghC1q	MERRTYKNNRFITFHYQKMNSVFVLLLTFISVVSGGGHETPQQVVTRYNNYKTICTGLGYEHVSCKAGNEGIVFQSSLSKTLQNLKNKETVIYDKVWLNEGKAYNEHTGKFTATVKGIYAFSWTTLSTSGKYFISEIVHNGNVMAYSYCDGRGIGGHPSSSNQVYINMRKGDKVWIRTHGSNGLYAHGGHWCSFSGYKI*
LOC111107899	sghC1q	MGSAFVLLLTFATIVSGGGHETPQQVVTKYNNYKTICTGLGYQNVPCDAGNGEIAFQSTLTNHLQNLKNQETVIFDKVRLNEGNAYNQKTGKFTATVGGVYSFNWQILSNPGKYFITEIVHNGNPIAFNYCDGRGISSGYASTSNQAIIRMKKGDKVWIRTHGGHGIFAYGGWCDFSGYKV*
LOC111107778	sghC1q	MVFKRLVSLYLIFSTVDLSRQSKNTDAILTSFKNLVIDNSHTTVTLNSTAIQTLIAISKAGKSNGQSNPAIGFSVGLSKTIYLGDKEAIKYDRVLTNIGNGFDKFSGHFTTPIKGLYVFSCTLMAEATGDLSVVLVKNGQEMSHAYSSAGKYDSGAISILLSLEKGDKVWIRRYGHGRTMNADYSWFTGYLISTMI*
LOC111107889	sghC1q	MRMESAFVLLLTFATIVSGGGNETPQQVVTRYNNYKTICTGLGYQNVPCSGAGNEDIVAFHSSLTKPMIKFKNQETIVFDKVLLNEGNAYNEKTGKFTATVDGVYSFNWSILSLSGKFFISEIVHDSALIAYDYCDGRGRNSGYVMTSNQANIKLKKGDKVWIRTHGKDGYAHGVNWCKFSGFKL*
LOC111107891	sghC1q	MNSACVFLLTFTAVVSGGGHETPQQVVTRYNNYKTICTGLGYQNLQCKAGNDGGIVFQSSLTKTLQNLQNQETVIYDKVWLNEGKAYNERTGKFTATVEGVYVFSWKTLSNPGKYFASEIVHNGNAIAYSQCDGRGLTGHPSSSNQVNIKMKKGDQVWIRAQGNYGQYAHGGNWCSFSGFKI*
LOC111108195	sghC1q	MIFKRLVSLFLIFSTVDLSHQSKNTDAILTSLKNLVIDNTVTLNSTALRSFIAISKAGKSNGQSNPAIGFSAGLSKDTYLGDNQAIKYDRVLTNIGNGYDKFSGHFTTPIEGLYVFSCTVMAKGTGDLSVVLVKNGQRMSNVYSAAGNYESGAISILLSLKKGDKVWIRRYEHGRTMSLEYNWFTGYLISTMI*
LOC111107900	sghC1q	MNSICVLLLTITTIVSGSGQETPQQVVTRYNNYKTIYTGLGYQNVRCDDVGEDIAFQSSRTEVLKNVKNQETVIYDKVLLNEGKAYDKITGKFTATVKGVYAFSWTTLTFSGKYFITEIVHNGNIIAYSYCDGRGLSGYAGTSNQANIKMEKGDKVWIRAHGNDGKFAMGGHYCNFSGFKI*
LOC111107895	sghC1q	MESVFVILLAFTTIVSGGGHETPQQVVTRYNNYKTICTGLGYQNVRCDAPKKDIAFQSSLTKHLQNMNNEETVIFDKVSLNEGNAYNQKTGEFTAAVEGVYSFSWKMFTSRGKYFITHIVHNGNPIAYNHCDGRGISVGHVSSSNQANIKMKRGDKVWIKTRKGDGLFAHGGNWCDFSGYKI*
LOC111107896	sghC1q	MESVFVILLAFTTIVSGGGHETPQQVVTRYNNYKTICTGLGYQNVRCDAPKKDIAFQSSLTKHLQNMNNEETVIFDKVSLNEGNAYNQKTGEFTAAVEGVYSFSWKMFTSRGKYFITHIVHNGNPIAYNHCDGRGISVGHVSSSNQANIKMKRGDKVWIKTRKGDGLFAHGGNWCDFSGYKI*
LOC111107890	sghC1q	MESAFVLLLTFTAVVSGGGHETPQQVVTRYNNYKTICTGLGYQNVPCDAGKGDIAFQSILMKDLQNLKNQETVIFDKVLLNVGNAYNQKTGEFTAPVEGVYSFNWKTLTTSARYFVTEIVHNGKPIALNHCDGRGISTGYASTSNQAIIRMKKGDKAWIRTHHNQGMYARGGYWSNFSGYKV*
LOC111107897	sghC1q	MGSAFVLLLTFATIVSGGGHETPKQVVTKYNNYKTICTGLGYQNVPCDAGNGEIAFQSTRTNHLQNLKNQETVIFDKVRLNEGNAYNQKTGEFTATVGGVYSFNWNILSNPGKYFITEIVHNGNLIALNYCDGRGISTGYASSSNQANIKMKKGDKVWIRTHGKHGIFAHGGGWCDFSGYKV*
LOC111110134	sC1q-like type 2	MSPRFVLGFLVAITTFILKADGDLVKTPLKSKADIFRLLLNQETLIRSALEKKVHHLVNDVVDIKEKLVNNKKEILYLKHKNQKFKAVNSKLHDAKTEIAALKNKNDKLQAETRKQLKHAKEEYVALNNKIIGLKANLQYQANVTKMLSAAIGESKNIQIKLSSAVSSFREIFRNNVSLQRRKLVGFTVGATNKISWNGSILRFNQVVTNSGHGYSTTTGKFTAPIGGSYVFFVATISDGKKSTLELAIVHNGVKKVMTESNTAAPYQTGSNLVVLKLDKGDCVWVESFHGQNIFYWRVPFTTFSGFLL*
LOC111107903	sghC1q	MESAFVLLLTFTTIVSGGGHETPQEVLTQYNHYKTICTGLGYQNVLCDTGDIAFQSSLTKNLQNLKYHETVIYDKVWLNEGKAYNQKTGEFTAPIGGVYSFNWKTVTDAKTYFVTEIVLNGNRIAYNHCDGRGLSAGNVSSSNQAIIKMKKGDKVWIRTRDNNGRFAIGLHYSNFSGYKV*
LOC111109433	sC1q-like type 2	MRFLKAMCFIILAMFNMIAETNGMLVHGNSSLSGQTHGSSGQILDMADITQILYNQTNELINLKKQAENDRSTIQLLQNRVFLLETELSDKMNASKVPSSQEFSTYLLSMNHLIQNMAANDENDKNLTRQFDIAVKHFEEYKAEMQFTLLNLTTELDHYKQQLESERSKVSLLQNLTQRTNNNFNDFKTDMLQMHVNQSTEMVGIKQELKSEISKVSLLHNVTQQTDEKVNDLRTDLLQTRLNQTNEMVDYKQQLENEKSKVYVLQNLTQRLNQRLNDLNVQIRYTSLSLLDLHTATEQLNGSLLQQLEERISDVHAHTIANVSNRIAFTAGVTLDSKTWSSGTLVFPHVITNVGNGYNPSDGVFTAPLAGVYVFFVNVQGYNDQIIYADIMMNGASKV…
LOC111108929	other/uncertain	MEVKTYNLDLILGPHDLKFNKDYFRQRQGSGLKSAFVLLLTFATIVSGGGHETPQQVVTRYNNYKTICTGLGYKNIPCVAGNGDVAFKASFTKHLENLKNQETIIFEKVLLNDGKAYNQRTGEFTATVEGVYSFNWKTLTKAGKYFVSEIVHNGNPIAFNHCDGRGISSGCVSSSNQANIKMERGDKVWIRAQGTYGLFALGNSWCDFSGYKI*
LOC111107893	sghC1q	MKSAFIVLLTFTTVVSGGGHETPQQVVTRYNNYKTICTGLGYQNLQCKDESDGGIVFQSSLSKILQNLKHQETVIYDKVWLNEGNAYNEKTGKFTATVDGVYSFSWTTVSNPGTYFITEIVHNGNIIAENQCDGRGLTGHPSSSNQVNIKMKKGDKVWIRTNTTNGRYAYGRNGCSFSGFKI*
LOC111107235	sghC1q	MGVLLLLSIVTLLLLQPSLASSPSEFINDFGGYQSVCRAIGWQPGKDCAVDNIISVIAFHANLNANVDNISTNTTIRFGNVQLNKGNGYDSNTGIFTAPEAGVYYFAWSLLSKQGGTVYVAAVVDNIDHAHTCINNQQATHINTSGHLINELKKGSKVWLRTWYVQATFLHGGYYTYFSGHRINSF*
LOC111107892	sghC1q	MNSAYVLLLTFATIVSGGGHETPQQVVTRYNNYRTICTGLGYQNLQCKAGNDGGIVFQSTLTKTLQNLKNQETVIYEKVTLNEGNAYSKDTGKFTAPVGGVYAFSWTTLSSPGKYFISEIVHNGKAITYSQCDGKGLTGYPSSSNQVNIKMKKGDKVWIRAHGKYGQYAYGGNWCSFSGYKF*
LOC111106117	sghC1q	MRYYLVFAFPICGWILTQTVQTANPADFLKDIKEYKDVCRSLECTTDKRNVIAFHANLRNTIKNIPKNTVLKFDDVKLNEGKGYDPKTGIFTVPTDGVYSFAWSLVSINGGTVDVAAIVDNVALVKTCVYKQQSNYLSISGHLLFKLKKGNKVWLKTFWTAATHIHSDGYTYFSGNQIR*
LOC111110140	sghC1q	MEMKMLPLFIIGLFSAVEKTECCFSKPPSVAFTASLSKRITVRPQAPVKYDHVVTNWGGAYNPSTGIFTAPYDGLYSISFTLMGNPSNDVRLEAVKNGERVAMVYTASKIYLQSSKIVHLILSKGDRIWIKNHSTSTTAKLHDWKVYNAFSGILIRDL*
LOC111108853	sghC1q	MKQKVVIIRVTESVARIMKYNFLFAFLMCTWILTKAVQTTNPADFLKEINGYKKVCQSLDCTTDKRNVIAFQANLKPNLQNLPINTALKFDNVKLNKGGGYDPNTGIFTAPEDGVYSFAWSFLSNNGGSVYVAAVVNNIIQVYTYIYKQQSYHISTSGHLLTDLKKGNKVWLKTVRLTATYIHGDSFTYFSGSLLR*
LOC111109427	sghC1q	MMNIPKLIIVCCAVLSLCCVQATSPPQFLKDINGYRSACKSIGWEPKQDCAVYNVVAFHANLNSHLINLEPNATIKFENVQLNKGNGYDPNTGIFTAPEDGVYSFAWSFLSKVGGTVYLAAVIDNADHAHTCIENQQSSYISASGHLLYELKEGNKVWLRTYHVPATFIHSGYYSYFSGSKINSL*
LOC111109867	sghC1q	MRYYLVFAFPICGWILTQTVQTANPADFLKDIKEYKDVCRSLECTTDKRNVIAFHANLRNTIKNIPKNTVLKFDDVKLNEGKGYDPKTGIFTVPTDGVYSFAWSLVSINGGTVDVAAVVDNVALVKTCVYKQQSNYLSISGHLLSKLKKGNKVWLKTFWTAATHIHSDGYTYFSGNQIR*
LOC111106425	sghC1q	MLNIPKLIIVCCAVLSLRCVQATSPPQFLKDINGYRSACKSIGWEPKQNCAVYNVVAFHANLNSHLNNLDPNTTIKFENVQLNKGNGYDPNTGIFTAPEDGVYSFAWSFLSKVGGTVYLAAVIENADHAHTCIGNQQSSYISASGHLLYELKEGNKVWLRTWHVPATFIHSGYYSYFSGSKINSL*
LOC111107236	sghC1q	MSIVLKLIIVCCAVLSLCCVQATSPPQFLKDINGYRSACKSIGWEPKQDCGMYNVVAFHANLIPHLNNVTPNTTIKFGNVQLNTGNSYDPNTGIFTAPEDGVYSFAWSFLSKVGGTVYVAAVIDNADHVHTCIQDQQSKFISTSGHLLHELKEGSRVWLRTFHVAATFIHGSYYSYFSGSRINSL*
LOC111110210	sC1q-like type 2	MAGLYCTTLSILCCICIIWMANGAEIRKDTISVEEFTEMKKMITNLLEKYQAQERKIADLEFEIQTLKSTKDKSENYSTEIMTEQEKSEILKTKRGLPQDISSFRTSNDTNDNSNENQMTHHDSNLHNGKEVRIVPHPTEGVVAFYAYMSSNENSPGPHHTLIYDHEVTNVGNGYNKHSGIFTAPVEGVYVFSWTIFMSSTGEYMSIVIALNSQPVGASYGHSANNYHAMVSGNVVLYMQKDDVVFTRTHTTYVPHGSIRSDNAMRSAFSGWCISCH*
LOC111110122	sghC1q	MNSAFVLLLTFATIVSGGGNETPQQVVTRYNNYKTICTGLGYQNLQCKAGNDGGIVFQSTLTKDLQNLKYQETVIYDKVTLNEGNAYNKDTGKFTATVGGVYAFSWTTLSNPGKYFITEIVHNGNSIALSQCDGRGLTGYPSSTNQANIKMKTGDKVWIRTYAKDGLYALGRWCSFSGFKI*
LOC111109426	sghC1q	MLNIPKLIIVCCAVLSLRCVQATSPPQFLKDINGYRSACKSIGWEPKQDCAVYNVVAFHANLNSHLNNLDPNTTIKFENVQLNKGNGYDPNTGIFTAPEDGVYSFAWSFLSKVGGTVYLAAVIENADHAHTCIGNQQSSYISASGHLLYELKEGNKVWLRTWHVPATFIHSGYYSYFSGSKINSL*
LOC111107901	sghC1q	MNSAFVLLLTFATIVSGGGHETPQQVVTRYNNYKTICTGLGYQNLQCKAGNDGGIVFQSTLTKDLQNLKYQETVIYDKVTLNEGNAYNKDTGKFTATVGGVYAFSWTTLSNPGKYFITEIVHNGNSIALSQCDGRGLTGYQSTNQANIKMKTGDKVWIRTYAKDGLYALGRWCSFSGFKI*
LOC111109688	other/uncertain	MMKFTDQTQCTDTTLTSLKNLVIDNSRTTVTFNPTALRTLIALSNSEKMPSIEAKTVCFSANSRAKDRSLRAGQTVIFDEVLTNEGNGYDYRTGEFTCPVAGNYMFVVDSHSYGSTWLHVFLNKKAVASLHAPPSGSYSQMSRTVILKLKKGDHVKVVNHLTATGVVYNEGYSGFSGTKLI*
LOC111107904	sghC1q	MESAFVLLLTVTTIVSGGGHETPQQVVTRYNNYKTICTGLGYQNVPCDAGEIAFQATLSKHLQNLKHQETVIFDKVLLNEGNAYNHRTGGFTAPVGGVYSFNWKTLTNAKTYFVTEIVHNGNLIAFNHCDGRGLNAGHASSSNQVII*MKKGEKVWLRTRGRDGLYANGYHYCDFSGYKV*
LOC111109577	sghC1q	MFGSYRSRTFQICVSMVTLVLVFALMLSCTDGLYIHTVQTFQDLRQQVQKGHAVAFTAILSKHTVVSSKAIVKYDHILSNVGGAYHPSTGIFTAPYKGIYSISCSLLSETSNGVNLQITKNGAKMSILYSAPSTYPHAGQTLQLLLNKGDKIWIQNYKAKEAKLHDYSAYNVFSGALITRL*
LOC111106086	sghC1q	MVAFLLIFAVMLNLTDCLYIHTVQTFQDLRQQGQTGPAVAFTALVSKDTTVGSKAVVKYDRVLSNVGGAYHPSTGIFTAPYKGIYTISCSLLSDPSNSVHLQITKNGSKVSILYSASSTHPHAGQTLQLLLNKGDKIWIQNVYSKLAKLHDHGSYNLFSGVLITRL*
LOC111106085	sghC1q	MVAFLVIFALMLNLTDCLYIHTVQTFQDLRQQGQKGPAVAFTALVSKDTDVGSKAVVKYDRILSNIGGAYHPSTGTFTAPFKGVYSISCSLLSNQSNSVHLQITKNGSKMSILYSASSTHPHAGQTLQLLLNKGDKIWIQNANSVVAKLHDHGSYNLFSGALITRL*
LOC111106371	sghC1q	MESALVLLLAFTTIVSGGGHETPQQVVTKYNNYKTICTGLGYKNLPCDAGNGEIAFQSTLSNHLQNLKNQVTVIYDKVRLNEGNAYNKKTGEFTAIVGGIYSFNWKTLTSVGKYFVTEIVHNGNQIAFNHCDGRGISSGYISSSNQANIKMKKGDKVWIRTRDKDGLFAYGYHYCDFSGYKV*
LOC111109504	sghC1q	MVAFLVIFALMLNLTDCLYIHTVQTFQDLRQQGQKGPAVAFTALVSKDTDVGSKAVVKYDRILSNIGGAYHPSTGTFTAPFKGVYSISCSLLSNQSNSVHLQITKNGSKMSILYSASSTHPHAGQTLQLLLNKGDKIWIQNANSVVAKLHDHGSYNLFSGALITRLK*
LOC111109866	sC1q-like type 2	MKRPWLRKIMLLTFVVVSNCNKESIDMSSLMDKVQALEIAAFHQNTKIDILEKSNKKLEDILLEKSEKIVYMEDTIRQLQQTVMQMDTKQAAGSANQTVLLENFEELSIRTVQEPKVRQENHRQDRLLSPPTTAPDTVGFYAVLSRKMENPGTHHTIIFDSVKTNLGNGYNSHTGVFTVPTSGLYAFTWSMRLFGTEHHSAQLVVNNVVQGAVFLSVTGGNENVSGSGVVYLNAGDDVLIRTTSDNQGNIESDPSGFTMFAGWLIK*
LOC111106852	sghC1q	MAVFVLIFALILNWTDGLYIHTVQTFQDQRQQVQKVPAVAFTALLSKHTDVSSRAVVKYDRILSNVGGAYHPSTGIFTAPYKGVYSISCSLMSNLSNNVHLQITKNGAKLSILYSAKDTNPLAGQTLQLFLNKGDKIWIQNNNAKVAKLHDHGSYNMFSGALITRI*
LOC111106372	sghC1q	MGSAFVLLLTFTTIVSGGGHETPQQVVTRYNNYKTICTGLGYHNVPCDVGKGDIAFQSLLMKDLQNLKYQETVIFDKVYLNVGKAYNQKTGEFTAPVEAVYSFNWKTLTNPGKYFVTEIVHNGNPIALNYCDGRGISMGHASSSNQAIIRMKKGDKAWIRTQSSYGIFARGGYWSNFSGYKV*
LOC111109792	sghC1q	MAIFVLIFALILNWTDGLYIHTVQTFQDQRQQVQKVPAVAFTALLSKHTDVSSKAVVKYDRILSNVGGAYHPSTGIFTAPYKGVYSISCSLMSNLSNSVHLYITKNGEKLSILYSAKDTNPLAGQTLQLLLNKGDKIWIQNNNAGVAKLHDHGSYNMFSGALITRM*
LOC111107777	other/uncertain	MFTEEEHNTRQKTSLKKINPKEDTQKETLVHMISLSLSLSLSLSLSLSVRQSNCAIGFSAGISKDVYLGDKQTIKYDRVLTNIRNGYDKFSGHFKAPIKGLYVFFCNVMASGENAISVDMVKNGKSISSVYSASANYESGAISLVLALKKGDQVWIRRSAHGQCKPGYFGLECRSLCTPPSYGEGCQLSCTQCSNEECDVSWGCPRETTTRVLQETSEISRDETSAIDYFSLQTTVQSRQYKHNKKINVALDTNGIQSLETVQNVNRDTLDWDVEVTVLLLLMGRAASSTAHTVQMKNVTHHEAVLIVNQATLDLDVEVTVLLQVMGWAASSPAHSVQMKNVTHHEAVHVSKYK*
LOC111109162	sghC1q	MSFRSESVVFAFVCLWSIGFIDANQVTPNSFISSYDKYKFICHKMGWEPKCRKHYPTGCSGEVIAFHATLTKTLRNVPQSTIIKFEKVLINQGRGYDPTTGKFTAPVDGVYSFSWTYCTEKGTTAYLSGFVDGKLMAKISNHSQVSAWQNTSGHLVIKLKKGSKFWVQNISKSVNIHILE*
LOC111109934	sghC1q	MNSAFVLLLTFATIVSGGGHETPQQVVTRYNNYKTICTGLGYQNLQCKAGNDGGIVFQSTLTKTLQNLKYQETVIYEKVTLNEGKAYNKDTGKFTATVGGIYSFSWTTLSTPGKYFISEIVHNGKAITYSQCDGRGLTGYPSSTNQVNIKMKKGDKVWIRAMEKYGQYAYGKNWCSFSGYKF*
LOC111109761	other/uncertain	MDTILTSLKNLVIDNSRTTFTFNSTALKNLIALSNSAKRPETTSIAETKTKLKALQSLVLNNAQTTVKLDSSALKQLLKLISHATIHRRANGIGFSANVKAKALKLGAGQTVIFDEVLTNDGNGYDDRTGVFTCPLAGTYMFVVDSLSTGPTWLHLYLNKTMVATLHVSGYHQKNTYLQMSRTVILKLQRGDHVKVVNFATAPGTVHHQKYSGFSGTLLY*
LOC111105837	sghC1q	MVALVLIFALMLSCTDGLYIHTVQTFQDLRQQVQKGHAVAFTAILSKHTVVSSKAIVKYDHILSNVGGAYRPSTGIFTAPYKGIYSISCSLLSETSNDVHLQITKNGAKMSILYSGSSTYPHAGQTLQLLLNKGDKIWIQNYNAKEAKLHDYSAYNVFSGALITRL*
LOC111109824	sC1q-like type 2	MAGLYWTTLSILCCICIIWMANGAEIRKNTISVEEFTEMKKMMTNLLEKYQAQERRIADLEFEIQTLKSTEDKSENLLTEIMTEEEKSEILKTKRGLPQDFSSFRTSNNPNDNSNENQMTHHDSNLHNGKEVRIVPHPTESVVAFYAYMSAYENTPSTHHTLIFDHEVTNVGNGYSKHSGIFTAPIEGIYVFSWTIFMSSPGEYMSIEITLNSQPVGASYLHSVHDYATASGNVVLYMQKDDVVFTRTHTTYVPHGSIRSDNLMRSAFSGWCISCH*
LOC111106835	sghC1q	MLAYAFIFAILYGCSDGVWHNSRPDEVAYGHNSQPHADAYGYHGGTIAFTALLSKDTVVGGKAVVKYDRILTNVGGAYSPITGIFTVPYTGIYSISCSLTSSPDNRVHLQITKNGNKLSILYAAETTTPLSGQTLQLLLRRGDKIWIQNRNDWAAKLHDHGSYNLFSGVLIKRMRVRHVHIYS*
LOC111108623	sghC1q	MSSGTVSLVSVIVCMVLNDCIDADKTHKDFLSSFDSFKNICHKIGWEPKCTTQPIKYCQGKTIAFHAILSKRLTNVQTNTIIKFDRALVNEGNGYDPNTGKFTAPVDGVYSFAWTYHTNRGSNAYLGGYVDGKLTAYVGIKHQSSQWENTSRNLVIKMKKGSQFWIQIFGYIAQVVHEEYSSLLGYKLSGC*
LOC111106513	sC1q-like type 2	MAGLYCTTLSILYCICIIGMANGAEIRKDTISVEEFTEMKKMMTNLLEKYQAQERRIADFEFEIQTLKSKDKIENYSTEIMMEKEKSEIPKTKRDLPQDISSFRTSNDPNDNTNENQMTQHDSNLHNGKEVRIVPHPTESVVAFYAYMSSNENSPGTHHTLIYDHEMTNVGNGYNKHSGIFTAPVEGVYVFSWTIFMNQPGEYMSIEITLNSQPVGASFVHGVNDYATVSGNAVLYMQKDDVVFTRTHTTYVPHGSIRSDTIMRSAFSGWCISCH*
LOC111107905	sghC1q	MNSAFVLLLTFTTIVSGGGHETPEQVITRFNNYKTICTGLGYQHEQCKAGIVFQSSLTKTLQNLKYQETVIYDKVWLNEGKAYDERTGIFTATVDGIYAFSWTTFSFPEKYFVTEKAMSYSQCDGRGQSGHPSSSNQFNIKMKKGDKVWIRTRRNYGVYAHGDNWCSFSGYKF*
LOC111110364	sghC1q	MSIVLKLIIVCCAVLSLCCVQATSPPQFLKDINGYRNACKSIGWEPKQDCGVYNVVAFHANLIPNLNNVTPNTTIKFGNVQLNTGNGYDPNTGIFTAPDDGVYSFAWSFLSNFGGTVYVAAVIDNADHVYTRIQDQQSKFISTSGHLLHELKEGSRVWLRTFHVAATFIHGSYYSYFSGSKINSL*
LOC111110202	sC1q-like type 2	MNIIMFTPVCLILSILGFTHQLESANSLLKSLQNNPRTTITLNSTTLRINIDLSNTPGYIQKQDVSFSVSVKGKELKLGTGQTIIYNNILTNDGNGYDDKTGVFTCPVAGTYMFVVDALSPGPTSLHVHLNKTKVASLHVSVYQKKSYLQMSRTIVLKVKKGDRVSVVNHVYSSGTLYHEGYSGFSGIKMY*
LOC111110363	sghC1q	MGVLLHLSILTLLLLQPSLGSSPSEFINDFGGYQSVCRAIGWQPRKDCAVDNIISVIAFHANLNTHVENMSTNTTIRFGNV*LNKGNGYDPNTGIFTAPEAGVYYFAWSLLSKQGGTVYVAAVVDNIDHAYTCINNQQSTYINTSGHLLYELEKGSKVWLRTWNVQATFLHSGYYTYFSGHRINSI*
LOC111109314	other/uncertain	MRIGEQSKIRRIVPPTYPPANQDEPIAFYAYMSAPMSNIGGHHTVIFDVIKTNSGHGLHPIAGVFTAPKSGIYVFTWTIRVFNNSYHGTELVVNGQKVGALIPHSGVSDNDTGSTSVVVYVNEGENVFLRKNMISNNGGIHSDSNGYSSFSGWKLM*
LOC111107771	sC1q-like type 2	MLGVVVFWAAVAFCSASLNVENELHEIRRILIYQEEEIRELKSENRVLRADVAEMAKEIEKLKADDNGYGFGGNITGSENEEVQIRNSSVNLKTLIRNADAEVTSGKVHSDMSRLAQGPVAFYAYMSQREPNPSLNYALIFDSVKTNVGGGYNEYSGMFTAPSSGVYVFTWTIYTGDHGQTKFHVYVNHDIFDITFGETDNNQDDSDSDSGTMVVSLNFHDNVYMRSAMTCTTYVYSGNAAKSTFAGWKIISL*
LOC111106427	sC1q-like type 2	MIPFGLAIAFVFSVGLYAKEYSISNLNPLSDVIDELKSLRQEVEENRKQILKQENELKTVKQELEEMKRHCQCGPNPDIEKSETGKNEVYSKTEKNINHIGGESRIKRIIPHTGQDGPVAFYAYMSTSMSNVGGHHTLLFDVIKTNAGNGFHSTSGVFMAPRSGFYVFTWTIRVYNTGQHSVELVVNGQGVGALYEHSGPGEDDMSSTTAVVHVNEGEDVFLRTKMDFNQGVIDTSVHGYSSFAGWKLN*
LOC111106512	sC1q-like type 2	MAGLYCTTLSILCCICIIWMANGAEIRKDAISMEEFTEMKKMMTNLLEKYQAQERRIADLEFEIQTLKSTEDKSENLLTEIMTEEEKSEILKTKRGLPQDFSSFRTSNNPNDNSNENQMTHHDSNLHNGKDSLEEYRCEGNIRINEDMEVLISYNGGQIDSLCHAMTIIGRDAQNMKQYQLCLETLRYSDPDCEILTGLVSANSQEYNCTHVPPTKICFPQNRNLRVHIEAIDLEKQSRNTSFLFKVNAFVTRNRMTLIINISAGSSAGLVLFIIVVMVIRICKRRPKQPETQKTDETEVYENSI*
LOC111110173	sghC1q	MECKMGFVAASLVFVLVSMVVIGCSDADQQKNSSFISIYDSYKKICHKIGWEPKCGKQPIKSAYCRPGKVIAFQAFLTKRLHNVAKNTIIKFERVLVNDGNGYNSTNGKFTAPVDGTYSFSWTYCTNKGSNTYLGGYVDGVLTAHISNYGQSSAWQNTSGHLLVKLKKGNKFWIQSFAYTAQLINEDYTFLSGYKMSGC*
LOC111110489	sghC1q	MVCGICWSLYLVLSLTGLTHQSQSRESMLTSLKNLVIDNSRSTVIFNSTMLRKLFALSANRPGIKMQSKSVGFSVNVKAKELKLGAGQTIIYDQVLTNEGNGYDDRTGVFTCPLAGTYIFVVDALSPPATWFHLYLNKTMVASLHVSAGHKSNTYLQLSRTVVLTLRKGDHVKVVNAVSYTGTVYHEGYSGFSGAKLS*
LOC111110318	sghC1q	MTLIMVFQTLFSLQLILSTMSFTHQTQRADTLLTSLKNLVIDNSHTTVTFNSTALRTLIALSHAGKSHGMVQINKKTVGFSANVMAKQLELGGGQTVIYDKVLTNDGNGYDDRTGVFTCPVAGTYLFVVDSLSRGPTWLHVYLNKIMVASLYVDGGHKHLYLQMSRTVVLKLKMGDHVKVVNHAKRNGIVYHGGYSGFSGAKLY*
LOC111107499	sC1q-like type 2	MNTKVLIVFILFTAVNTQNPLTGTSSECCEGNAETLKDLVQRVTSLESQLGVLKAENDNLRMNSSALVALQNELTQIKSRQQPVAFFAELSNDLVNPASGQKVVFDQVLTNVGNAYSPSSGVFTAPVTGTYHFNVVLSSPNNRDSGHYMHFFLLQNGRKIAYLFLDHNTDYWLHASTSAVVQATKGDLLWLSVGVVVGRHTLAGHKQGEGEIHSHVSGFLIQAD*
LOC111108506	sC1q-like type 2	MEYHFRIFCVILGIMGIIGNVLCITEEEIIKIVERKMEKIIKKYDRKIALLQEKIHAQDVKFQNLEKKCSTPTKDAIEKGEEKSIQPNVSTGGNNTGMQSKRLASSRHANVERIAEGTSGHVAFCAHMAASEHSPSLHHIILFDIVKTNIGSAYNKNSGMFTAPADGVYTFTWTIFSGYYSYVYTQIVVNSNAFDSMIVNSEEVGDMHSGTKLIVVSLTRGDVVYVRTDDTYLSHGDLYSGRVNGYSSFCGWKL*
LOC111105962	sC1q-like type 2	MIPFGLAIAFVFSVGLYAKEYSISSLNPLSDVIDELKSLRQEVEENRKQILKQENELKTVKQELEETKRHCQCGPNPVLEKSETGQKVYSKTEKNINHIGGESRIKRIIPHNGQDGPVAFYAYMSTSMSNVGGHHTLLFDVIKTNAGNGFHSTSGVFMAPTSGFYVFTWTIRVYNTGQHSVELVVNGQGVGALYEHSGPGEDDMSSTTAVVYVNEGEDVFLRTKMDFNQGVIDTSVHGYSSFAGWKLN*
LOC111109816	sC1q-like type 2	MHAQLYTLFLFFATIGIGKSDSINCISREEFEKFKAEVFFRIENLSSENNQQAKYIEDQKKTILELKTSLSRYGNTSAIDPHAEESATNSTEKVALQVLNDGKMDSSSVPRHVPSRRAVPFKRLLPVPTVVPEEVIAFYAYLTTSENNPGEHHVIIYDNVVTNVGNGYSKHTGAFVAPRTGVYVLTWTTFGCGNSHFSVELTVNSTPTGTVFSDTGAHYSGVTGIAVVQLQQSDVVMVRTRPGYTPHGSICSNVNMRTAFSGWCISC*
LOC111108622	sghC1q	MKMDLKLKPLALAFICVVVIGFGDTAQQNSNNFLSSYDVQECVCQKMGWEPKCSKQPIKACPGKVIAFHAVLSNHLRNVPTSTIIKFDRVDLNDGNGYDPNTGKFTAPVDGVYYFLWTFSINKGTIAYLCGTVDGTCRSHVATYDLASKAEQISGHLVTRMKKGNRFWIQTFWKTVQFLHNNYSFLSGYKVSGC*
LOC111109875	sC1q-like type 2	MQPNLKLLLSLLVILYSIQFVKCTENRLEQLERIVGKLQDTIFMLSKDNANYKRLVEDLKFKVNDQEERIGALEKGCKIETRIASSRATKKRVGYYNDSFNEAFEDLNANMPFWRKAFEDLNANMPFWRKAFEDLNANMPFWRKKAKPNTFMKRTSFSDRGSSENVAFFAYMSQDLSSPSVAHILVFYITPTNIGNHYNKYSGMFTAPRSGTYVFTWTIYCSVGGYVYEQLMVNAEVLDSSYCNADGAGWHRSISGTAVAQINQGDIVYVRTHPTSLNKGRILSSSSHRSSFAGWLLF*
LOC111105959	sC1q-like type 2	MIPFGLAIAFVFSVGLYAKEYSISNLNPLSDVIDELKSLRQEVEENRKQILKQENELKKVKQELEEAKKHCQCGPNPVIEKSETGKNEVYSKTEKNINHIGGESRIKRIIPHNGQDGPVAFYAYMSTSMSNVGGHHTLLFDVIKTNAGNGFHSTSGVFMAPRSGFYVFTWTIRVYNTGQHSVELVVNGQGVGALYEHSGPGEDDMSSTTAVVYVNEGEDVFLRTKMDFNQGVIDTSVHGYSSFAGWKLN*
LOC111109658	sC1q-like type 2	MNTKVLIVLILFTAVNTQNPLSGTSSECCEGNAETLKDLVQRVTSLESQLGVLKAENDNLRMNSSALVMLQNELTQIKSRQQPVAFFAELSNDMVNPASGQKVVFDQVLTNVGSAYSPSSGVFTAPVTGTYHFNVVLSSPNNRDSGHYMHFFLLQNGRKIAYLFLDHNTDFWLHASTSAVVQATKGDLLWLSVGVVVGQHTLAGHKQGEGEIHSHVSGFLIQAD*
LOC111105776	sghC1q	MVCGICWSLYLVLSLTGLTHQSQIRETILTSLKNPVIDNSRSTVTFNSTMLRKLFALSANRLGMQIPTKSVSFSVNVKAKELKLGVGQTVIYDEVLTNEGNGYDDRTGVFTCPLAGTYIFVVDALSPRVTWLHLYLNKSIVASLYIQTNHASGTYLQISRTVILTLKKGDHVKVVSDISHTSDVYHNGYSGFSGAKLF*
LOC111109313	sC1q-like type 2	MIPFGLAIAFVFSVGLYAKENSISNLNPLSDVIDELKSLRQEVEENRKQILKQENELKTVKRELEETKKHCQCGPNPVIEKSETEKNEVYSKKEKNINHIGGESRIKRIIPHTGQDGPVAFYAYMSTSMSNIGGHQTLLFDVIKTNAGNGFHSTSGVFIAPTSGFYVFTWTIRVYNTGQHSVELVVNGQGLGALYEHSISGEDDMSSTTAVVYVNEGEDVYLRTKMDYNQGTIHTSVYGYSSFAGWKLNN*
LOC111108468	sC1q-like type 2	MAPWHCCILLVCLLSPLKAEADDREWKEEMDKQLKKVLSIVEEQAQEIMTLKTRINVLETMREETEMRLASSIRETETNISHIAKKLDEQSLTLEGQQKRLLINSINEGTAVAFYAYISKDFTHIGNGHVFVFDTVVTNRGNAYNNYSGIFTVPSSGLYAFSYSIAVAGYHMSGDHDSNFGEISVQLVRNGSPCGSIAADTEASYDDEMATGFAILSLDAGDIVRVVSQNSGQGTFRSNTYEHWAFSGFKISS*
LOC111106431	other/uncertain	MMTSLKNLVIDNSRSTVTFNSTMLRKLFALSANRPGMMKQEKSVGFSVNVKAKELKLGAGQTVIYDEVLTNEGNGYDDRTGVFTCPLAGTYIFVIDALSPPATWLNLYLNKTMVASLHVSAGHKSNTYLQISRTVVLTLKKGDHVKVVNNVSYTGTVYHGGYSGFSGAKLS*
LOC111110294	sC1q-like type 2	MQPNMKLLLSLLVILYSIQFVKCTENRLEQLERIVGKLQDTIFMLSKDNANYKRLVEDLKFKVNEQEERIGALEKGCKIETRIASSSAMKKRVGYYNDSFNEAFEGLNANMPFWRKKAKPNSFMKRTSFSDRGSNENVAFFAYMSQDLSSPSVAHILIFDMTPTDIGNHYNKYSGMFTAPRSGTYVFTWTIYCSVGGYVYEQLMVNAEVLDSSNCNADGAGWHRSISGTAVAQINQGDIVYVRTHPTSLNKGSILSSSSHRSSFAGWILF*
LOC111106428	sC1q-like type 2	MIPFGLAIAFVFSVGLYAKENSISNLNPLSDVIDELKSLRQEVEENRKQILKQENELKTVKRELEETKKHCQCGPNPVIEKSETEKNEVYSKKEKNINHIGWESRIKRIIPHTGQDGPVAFYAYMSTSMSNIGGHQTLLFDVIKTNAGNGFHSTSGVFIAPTSGFYVFTWTIRVYNTGQHSVELVVNGQGFGALYEHSISGEDDMSSTTAVVYVNEGEDVYLRTKMDYNQGTIHTSVYGYSSFAGWKLN*
LOC111105960	sC1q-like type 2	MIPFGLAIAFVFSVGLYAKENSISNLNPLSDVIDELKSLRQEVEENRKQILKQENELKTVKQELEETKKHCQCGPNPVIEKSETEKNEVYSKKEKNINHIGVESRIKRIIPHTGQDGPVAFYAYMSTSMSNIGGHQTLLFDVIKTNAGNGFHSTSGVFIAPTSGFYVFTWTIRVYNTGQHSVELVVNGQGFGALYEHSISGEDDMSSTTAVVYVNEGEDVYLRTKMDYNQGTIHTSLYGYSSFAGWKLN*
LOC111110026	sghC1q	MSFGAAPLVFVFVNMVVIGCTDADQQKPSSFLSSYDSYRNICHKIGWEPKCRKQPISDCQRKVIAFHAFLSTRLNKVPTNTIIKFGRVLVNEGNGYDPNTGKFTAPMDGVYSFSWTYHTNKGSIAYLGGFVDGTLTARIGNYHQTNTWENTSGHLIIKMKKGGQFWIQTFLTTTQIIAEDYTSLSGYRISGC*
LOC111105820	other/uncertain	MLTSLKNLVIDNSRFTVTFNSTVLRKLFALSANRPGLQMGAKSVCFSVNLRAKELKLGVGQTVIYDEVLTNEGNGYDDRTGVFTCPVAGNYIFVVDALSPRPVWLHLYLNKAIVASLHVSSNHASGTNLQISRTVILTLKKGDHVKVVNNPTYTGAVYPHGYSGFSGAKLF*
LOC111109874	sghC1q	MGFGVASLAITCLYVVAIDCVDADQQTSNSFLSSYDKQECICHKMGWEPKCKRSCSSGCESACRNYCQPVSQGNIIAFNALLSSGLYNIPVHTIIKFKEVTLNEGNAYDPNTGKFTTPVDGVYYFAWTYCSHVKSDAYLCGYVDGKLTARIALMGQKVYWQNTSGHLVTKLKKGQQFWIAVHGYPVKNLYPRFTFLSGYKLPG*
LOC111109928	sghC1q	MSAYLTVLLLFSFFEFAKSKSSECISREEFEKFKTEVLTRIESLSLEKYEQAKQIEDQKTAILHLGSLLEKYGDTSLTSSHIQEFTTNLTEKVPVEPANSMKDSSIPLPLRTETPLKRLLPTGIRVPEDVIAFYAYLTTSEINPGAHHTVVYDHVVTNSGNGYSKHTGAFVAPRAGFYVFSWTTFADPHSYFPMELTLNSVRAGIVFVQGDTTYNGVTGVAVIQLQQNDVVMVRSEPGYTPNGNIYSDPNTKTSFSGWCISC*
LOC111107086	sghC1q	MSAYLTVLLLFSFFEFAKSKSSECISREEFEKFKTEVLTRIESLSLEKYEQAKQIEDQKTAILHLGSLLEKYGDTSLTSSNIQESTTKLTEKVPVEPANSMKDSSIPLPLRTETPLKRLLPTGIRVPEDVIAFYAYLTTSEINPGAHHFVVYDHVVTNSGNGYSKHTGAFVAPRTGFYVFSWTTFVDPHSYFPMELTLNSVRAGIVYVQGDTTYNGVTGVAVIQLQQNDVVMVRSEPGFTPKGNIYSDPNTKTSFSGWCISC*
LOC111108467	sC1q-like type 2	MAAWHCCILLVCLLSPLKAEADDREWKEEMEKQLKQVLSFVEEQAQLIERQNLEITTLKNRVNVLETINAMREETEMIPTSSIHETETNISNIVNTLDEQSLTQEGRQKRLPVRQIKEGTAVAFYAYISKDFTHVGNGHVFVFDTVVTNSGNAYNKYSGIFTVPSSGLYAFSYSIAVAGYHMSGDYDSNFGEISVQLVRNASPCGSIAADTEARYEDEMATGFAILSLDAGDIVRVVSQSSAQGTFRSDSVEHWAFSGFKISS*
LOC111110304	sghC1q	MKMGFGVKSLTFAFICIVVISLADANQPTSSFLRGYDMQEYICHKIGWEPKCRNRCSLDCQQKRVAFHAFLSTRLHNVRKNTIIKFERVLVNDGNGYDPKSGKFTAPVDGVYSFLWSYCSSKGSTAYLGGFLDGTLTSKIGVRDQANLWQNTSGNLIVKMKKGSQFWIQNFHLTAQLIHEDYTYLSGHILYCC*
LOC111110103	sghC1q	MVNVFRTAFWAQLSLVLSFVWSSHQDQSKSTGTLLTSLTDLVIDNSRATATFNSTALRTLIALASNRKGTLQKLANGVSFSVNIKDKELKLGAGQTVIYNEILTNDGSGYDDRTGVFTCPLTGTYLFVFDAHSPGNTCLDKSEQSENLNKSKVAMGCVSSHLGKTYLQMSRTVILKLKKGDHVKVVALSAGAVHHRGFSGFSGTRLY*
LOC111109123	sC1q-like type 2	MKYTLVFCVILGIVECVLGITEDEIDKIVETKMQKVIQKYDKKIALLEEKIHAQDVKIQNLEKKCSNPTMDAAEHGENASVQQVSLNRANDTGIHSKRQASSSQETLKRSFPTGTSGHVAFCAYMSTSENSPSLHHIFVYDIVKTNLGSAYNKYSGMFTAPDDGVYVFTWTIFSYLQSSIFTQLVVNSDAFDNMISDSQEVGDIHSGTKLIIVSLNRGDVVYVRTDDTIPSIGTVYSGRQFGYSSFCGWKL*
LOC111110036	sC1q-like type 2	MENHFRIFCVIFVIMVIRNSVLCITEEEINKIVERRMEKVIRKYDKKIALLEEKIHVKIQNMEKKCSTPDAEEEREKVSFQHTAVNLDNNTHLQGKIVSHVSKRRDNQLRIVQGDSGHIAFCAYMTTREISPSLHHTIVFDSVKANIGSAYNSISGFFTAPANGLYVFSWTIFSSPNSFIFTQIIVNSNALDSMVTDSEHVADTHSGTKVIVVGLNRGDMVYVRTHPTTLSHGDVSSSPEFGQPSFCGWKL*
LOC111108736	sghC1q	MFAFICFSLLYMVVAETLNQGVFLKNLNSYKNTCKEMGWAPTCHAETVKSQAVAFHVYLKNPIASLSQHQILKYDHVVTNIGGGYSTTTGKFTAPVDGVYSFSWTYMTKKGAACYIGGVVDGRQLVWSAIHDQTATWISTTAHVVIQMKKGSEFSTQNRARYAAYIHDHYTFLTGYKISD*
LOC111110620	sghC1q	MFAFICFSLLNMVIAETLNQEVFLKNLNSYKNICKGMEWEPPCDGEKIKSKAVAFQVYLKNSITNLGNGQILKYDQLVTNIGGGYNTTTGKFTAPADGVYSFSWTYMTKKGSACYIGGVVNGRQLVWSAIHDQTATWISTTAHLVVQMKKGSEFWTPNFTATAGYINDHYTFLTGHKISD*
LOC111108735	sghC1q	MFAFICFSLLNMVIAETLNQEVFLKNLNSYKIICKGMEWEPPCDGEKIKSKAVAFQVYLKNSITSLGNGQILKYDQLVTNIGGGYNTTTGKFTAPADGVYSFSWTYMTKKGAACYIGGVVNGRQLVWSAIHDQAATWISTTAHLVVQMKKGSEFWTPNFTGIAVYMHHHYTFLTGHKISD*
LOC111110375	sghC1q	MLFKPALSLAVTVSLLTIVSVRGTSLVETKTKLKALQSLVLNNAQATVKLDSTALKQLLKLSSYGMVQLHGIKVSFSVNMKAKELNLGGGQTVIYDEVLTNDGKGYDDRTGVFTSPVAGTYMFVVDALSPKPLWLRIFLNKTIVASLHISESHSNGVYLQISRTVILKLRKGDHVKVVSAAKGSVHNNGYSGFSGAKLY*
LOC111109115	sC1q-like type 2	MAPCHCCILLVCLLSPLKAEADDREWKEEMEKQMKQVLSIVEEQAQLIKRQNLEITTLKKQTQEIGTLRKRIDVLETMNTMREETELKLASSIRETETNISHIAEKLNTKEGQQKRLLINSINEGTAVAFYAYISKDFTQIGKDHEFVFDTVVTNSGNAYNNYSGTFTAPSSGLYAFSYSIVVAGHHISGDHDSNLGEISVQLVRNASPCGSIHADTEAPGDDEMGTGFAILFLDAGDIVRVVSLYASQGTLLSNGYAYWTFSGFKISG*
LOC111105957	sC1q-like type 2	MLPLWCFIGFLFFVGSCAQDNSNLDQYQWSDIIDELKILRKEVELNRKRIVQQEGELKAVKIELEKNKRYCHSEPNPTEEKSKTEELEVFSRGKNSITRNRGLSKIKRIIPPTNPPTNHDGPIAFYAYMNAPMTNIGGHHILLFDVVKANVGFGFHSTAGVFTAPKSGIYVFTWTVRVFDYGVNTVELVVNGQVVGALVPHSGAHDNDTGSTTAVVSVNEGEDVYLRTRIDNNLGVIYSDANGYSSFAGWKLT*
LOC111105873	sghC1q	MFTFICFSLLYMVVAETLNQGVFLKNLNSYKNTCKEMGWAPTCHAETVKSQAVAFHVYLKNSITSLGNNQILKYDHVVTNIGEGYNTTTGKFTAPVSGVYSFSWTYMTKKGGVCYIGGVVDGRQLVWSAIHDQKAMWLSTTAHLVIQMRKGSEFWTPNYTGNAVYIHSFFTFLTGHKISD*
LOC111109312	other/uncertain	MNELKLLRKEVEENKNELKAVKLELEETKRHQTCQCEPNSAYAKSKSDRNEVLSQETNGINRSGAKSMIKRIVPPTSPPTSHDDTIAFYACMSASMTNIGGHHILHFDDIKTNLGYGLHNTTGVFTAPKSGFYVFTWTIRVNKDSYHSVELVVNGQEIGALYLYCGSIEYDQGSSTAVIHVNEGADVFLRTKMMYNNGKIFSDSYGYSSFAGWKLT*
LOC111109864	sC1q-like type 2	MLHLWLVIGFLLCGGSYAKESSNLDQNQWIDIMNELKALRKEVEENRKRINYQESELKAVKLELEETKRYCHSEPVPTKEKSKSEEVEVFSRVKNSINRSREQSKIRRIIPPTNPPTSHDGPIAFYACMSAPMNNVGGHHILLFDIIKSNLGQGLHPTMGVFTAPKSGVYVFTWTIRVYDNSYHSIELVVNGQVVGALFPHSGAGDNDTGSTTAVVRVNEGEDVYLRTRIDTNVGVIFSATTGYSSFAGWKLT*
LOC111110320	sC1q-like type 2	MWPLFLIGLLVSGSLSIPLDLESRLVDLERKFEQQLLVNRRLQGELTVIRNSNRGLPLYPSLLEEDPADGSHSTDKRLLQQAELPVDGIGFYAYMSTDEPDPRGHHTLVYDIIQTNLGQGYNKNTGVFTVPKAGLYSLTWSTRVACHLAHTTELVINDRILGSTYAYCGYNTVTGHVVATVSQGDVIFVRTHSTSPGQGAIKSNEFGRSAFSGFLIH*
LOC111105956	sC1q-like type 2	MNNKLKMMRLQFVIGCLLLVGSYSQEHVVLDRNELSDVMNELKLLRSEVAENRKRIVLHENELKAVKLELEETKRHCNCEPNSSNVMSAPAVNEDTSKEANNSIQRNEYARMNRIIPPTDHPINPAEPIAFYAYMSTYMNNIGGHHTLIFDVIKANPGLGLHPTTGVFTAPKSGFYVFTWTIRVYNNSYHGVELVVNGQAVGSLYGHSISNEYDTSSTTAVVYVSERGDVFLRTRMDYNQGGIMSTSYGHSSFAGWKLA*
LOC111110212	sC1q-like type 2	MSYIWVLTLSCLVTSTLCQMDVVDETENDSRISKMSEAIGRFESMVADLMTDNRKLKKLTSELARRLEEETQLRKQLEQRIGGQGHEINLKSWERGSRTDIGGDIPVFEASPKTTQKKNVLRSSNDTIAFYAYMTTRKPSPGNLHTLLFDAIFTNEGNGYNHHMGVFIAPKSALYVFTWTIRANDGSYFNTQLIVNGLVYGSMFSRDYYYSNSNSATAVVRVAAGVAVFVRTGPASNSGDIISSFDGYSTFSGWSID*
LOC111110354	sC1q-like type 2	MKNKLKMMLLQFVIGCLLLVGSYSQEQVVLDRNELSDVMNELKLLRSEGAENRKRIILQENELKAVKLELMETKRHCNCEPNSSNVMSSSEVNKDISIDEKNTIRQNEHARMNRIIPPTNPPVNHRDDEPIAFYAYMSTDMNNIGGHHTLIFDVIKANPGLGLHPTTGVFTAPKSGFYVFTWTIRVYNNNFHSVELVVNGQVNGALYVHGGTGEDDMSSSIAVVYVSERGDVFLRTRISYNQGVIESNSYGYSSFAGWKLA*
LOC111110116	sC1q-like type 2	MFYNWILTLACLVTFTRCHTDVVDETENVSRIPGTSEAIKRLESIVADLMTDNRKLKKLTSELTRRLEEEESLRKQLQQRIRDHEIILQSWERGSRNNIGGEIQVFESSKKSTQKRDVLRSSNDTVAFSAYMTTHKSSPGNLNTLVFDAIFTNEGNGYNHHMGVFIAPKSALYVFTWTIRANGGAYFNTQLLVNGLVYGSMYTIDLYYSNSNSATAVVRVAAGIAVYVRTGPTSNSGDILSSFDGYSTFSGWSID*
LOC111106662	sC1q-like type 2	MSYIWVLTLSCLVTSTLCQMDVVDETENDSRISKMSEAIGRLESMVADLMTDNRKLKKLTSELARCLKEERRLRKRNGGQGHGIMGLQSWERGSRTDIGGEIPVFEASPKSTQKRAVLRSSNDTIAFSAYMTNRKPSPGNLNTLVFNAIFTNEGNGYNHHMGVFIAPKSALYVFTWTIRAESGHYFNTQLLVNGLVYGSMDTRNYYSSVSNSATAVVRVAADIAVYVRTGPTNNYGDILSSFDGYSTFSGWSID*
LOC111105966	other/uncertain	MNELKLLRSEVAENRKRIILQENELKAVKLELMETKRHCNCEPNSSNVMSSSEVNEDISIDEKSIIRQNEHARMNRIIPPTEPPVNHAEPIACYAYMSTDMNNIGGHHTLIFDVIKANPALGLHPTTGVFTAPKSGFYVFTWTIRVYNSYHGVELVVMGQVVGSLYAHGGTGEDDMSSSTAVVYVSESGDVFLRTKMDYNQGGIRNNPHGYSSFAGWKLA*
LOC111105797	sC1q-like type 2	MLLNFFIRAALVQTVWGILQNNNHPATTSSPDGIVLQQTLGLLVVELDKRVNDLQNKVAGLEADRQQYLDKVTKLETSLSSERLKVESLQQTLEGQNASLASLQLENSLLKNATLQLNFTASSLIAKHLETSLSAERLEVESLRQILEGQNASLAELQLDNYLQKNASLQLNSTLSSVIADHQDMQANIENLKNFSMPLIQKDFNNMETQIKRILYHEISIAGNLSNVQNVLHDLHDYVYRKKPAFTAYLDGSFQSNGAIILPHVYSNMGSLYDPTTGIFTTDQTGNYAFYVGLECTGKGMKIVELVKDGNKIAHATCFPKDTGNTDDTGIYYGSTFCVHHLDVGSKVWIKDTRHENVIVGGKTTLSGFLL*

## Sheet: Chr9
Gene	Type	Protein Sequence
LOC111114048	sC1q-like type 2	MKALISLLLIVSFENARAAEETTLQSVLEELENLKKIISQQQTKIGSLEENLKSVTEQNRKLQEEVVHLKSDQEVIREKLNLKQTKVPNIPKNFGEEPRKKSRGSDDIVLSRHKRLLPISQSPLEVGFTALRHQDPVVVHTNAVIIFETAITNTGSAYNPSSGIFRAPTSGLYVFFYDIECMRNNGDTYVELVRNGTQTGIQAYCHGSGDVDNSSTLGVLQLSTGDTVWVRLYSSDNITFGGKTLFSGFLL*
LOC111111218	sC1q-like type 2	MSGKLLLIFVVFEFSRMLHAASVGSDSLDDYERLRQRVQRESMITTTIMNSVNVLQLEFSTMITDQKQQNADIKLLLQQVAALSKLNTQLNSELNQMKRNSTESNMRLNDMINQNSNKVNGVSDKIVKEIGDVRKEISRQNNDIELLQVDINQLKRSSVDERAFTEKVTSITQQIGEVKTANGMNSHVIEELQQEVNNLKETTVKQTDFQEKYSQMTNEMENVKSNGINNSYVISEILNEVETIAFNQSRHDINLMYLNQKVKSLEKRTDSLETGMENMTVSLSSYDSSTKGMSTVISEMQGDLTSVQDSSKDLGEIVLRLTNDMMFLQSNTVQLTDSISGLENNVTSLQLDSDKHDDSLRNLKKNVSIVQDVQNAMESDIFKQRKYLLSQKDSSEGMA…
LOC111111419	sC1q-like type 2	MFGLMFISCLLSRFAFHADAGRLNSSSSDTSMLLNADTTVLRQLLNQETLIRMSVVKNVDNLMKDIVTLKDSMTSLQNEVISIKQISKDKQDYVMKELEGIKRQIHLLNDTQMIFEENLKKQNSTGLDLLNMVEKSKAEGRRFQTDTRKSLEEAKKNTTDESLDLKMQVRVLSTSLMRLNEHVQQQDKSFHQLIENNYKAASELITNASLNVQEKTNASLHDLMSDLSETKQNQLRLSAGVLSLEWFRNNISGGVIKMKERNAPTAFTAGVTDSSSYWSSGILVFPTILYNIGRGYDSSTGIFTSPEDGTYVFYVTIRSYNSYSIDVDIVKNGISKVRVDTHGTYQTGTNMAVLSLDRGDKVWVKFHSGQGYYSTSTPVTSFTGFQI*
LOC111110972	sC1q-like type 2	MWARLVPVLLSVVYTYSLSLLTDDKSQITKTDGETVILRQLLNQETLIRMALDNKVNDLVKSMAEMKNTIKACNKQLEDANRKMETNRIQLQDAKTEIGTNSKQLEDAKREIESNNKQLQDVKREASALKNENTGLKAEWQVMSNATAFLSDILNTTIENMKQSQNSQRELSSAVSSLQIFQGNISRISEKKNVAFDAQMKNNINLASKSRVIFETVNLNEGNGYDPSTGIFTAPAAGMYVFDWTTLTQYGKDVFTSLVVNNNFKSWNYCRNGSSNTHLSCSKMTVVKLKQGDQVWIGVFSETANINYKFTSFSGYKL*
LOC111116061	sghC1q	MSLILFALFMVLPWASPENVSTKPGMKIFRDEYKSVTAACLDLGFTKKVCNNGSDSGKKVVAFDVRLSHHVNNLGSHGRVVFDTVDLNEGHGYDPSTGIFTAPAAGVYVFDWTIMTQQGKYAHTSLVVNGKLQSWNHCHDYVKTYLSCSKMTVVKLKQGDKVWIGVWYGPADIYKTHTSFSGFKQ*
LOC111114161	sghC1q	MYIKYKSVTAACLDLGFAKKACNAGSYTEKRIVAFDVRPTNDVNNLATNGRVVFGTVDLNEAKGYNPSNGIFTAPASGVYVFDWTTMTQVGKSAYTSLVVNGKRKSWNHCNPIGSKTYVTCSKMTVVKLKQGDKVWIGVFSGPAYIYHHYTSFSGYKL*
LOC111114818	sC1q-like type 2	MFRLIFMLCLLSQFALHADAVRLNSSSSESLLNADTTVLRQLLNQETLIRMSVVKNVHNLMKDVVTLKDSMTSLQSEVISIKQKSKDEKDYVMKELEGIKRQIKLLNETQMIFEENLKKQNSSGLNLLNMLESSQAEGRAFQTDTLKSLEEVKKNNTDELSDIKMQVRVLSASLMRLNEHVQQQDDSFHERIENNYKAASALFTNVSINVQEKTNASLHDLMSKLSETKQNQLRLSAAVLSLEWFKNNITGGVKESSKKRNAPIAFTAGVTGSDHYWSSGILVFPTVLYNTGRGYDSSTGIFTSPEDGTYVFYVTITSYNSKSIYVDIIKNGLSKVRAKAYSSNQSGSNMVVLSLDRGDKVSVNFHSGRGYYSASTPVTSFTGFQICCF*
LOC111115933	sghC1q	MFLELFALFMVLPWALSNNVSTKPGLKIFRDEYKIVTAACLDLGFAKKACKSGSYSDKKVVAFDVRLNGHIRNLGTNGRIVFETVGLNEGKGYDHSTGKFTAPASGMYVFDWTIMTQLGKYAYTAIYVNGDAKSFSHCYDGTSKTYVSCSKMTVVKLNKGDKVWIGVFSGPANMYATYTSFSGYKL*
LOC111112977	sC1q-like type 2	MKALIALLLIVSFENARAAEETTLQSVLEELENLKKIISQQQTKIGSLEEKNRKLQVEVVHLKSDQEVIREKMNLKQTKVPNIPMNFGGEPRKLSRGTGDIILSRHKRLISPQEVGFTALRHQVSVVHTNAVIIFETLITNAGSAYNPSSGIFRAPANGLYVFFYNIECSAMGHNDNTQVELVRDGSQTGIQAYCHGTGDVDNSSTLGILHLSAGDTVWVRLLYGDNITFGGKTLFSGFLL*
LOC111115978	sghC1q	MYLILFALLMVMPCAFSEKVSTKPGLKMFRDEYKSVTQTCLDLGFAKNSCNSDKVAFHVTLSKNLYNLARLGRVVFEAVDLNEGKGYDPSTGVFTVPAPGVYVFDWTTLNQVGKYALTSLVVNGTSRSQVYCDGNVNTHLSCSKMTIVKLKQGNQVWIGVFGGTHGNSYFVKNYTSFSGFKL*
LOC111110819	sghC1q	MFLKLFALLMVMPWVLSDKVSTKPGLKMFRDEYKSIKETCLDLGFVKKSCTSGSVSVAFDVRLGKHVNNLAKKGRVVFGTVDLNEGKGYDPSTGIFTAPSAGLYVFDWTTMTHQGRDVYTSLVVNGIFKSWNHCRDSLSKTYLSCSKMTIVKLKQGDKVWIGVFSESATIYKHYTSFSGFKH*
LOC111113320	sC1q-like type 2	MKALISLLLIVSFENARAAEETTLRSVLEELENLKKIISHQQTIISQQQTKIGSFEENLKSVTEQNRKLQEEVVHLKSDQEVIREKLNLKQTKVPNRSKNFGGEPRKLSRGADDIILSRHKRLISPLEVGFTALRHQVSVVHTNAVIIFETSITNAGSAYNHSSGIFRAPANGLYVFFYNIECSAMGHNDNTQVELVRNGAKTGIQAYCHGTGDVDNSSTLGILHLSAGDTVWVKLLYGDNISFGGKTLFSGFLL*
LOC111112975	sC1q-like type 2	MNQEILKIKALIVILLFVSFENAAAAEDTTLQTVLEELEILKKVISQQQTKIGLLEENLKSVKEQNRKLQEEVVHLKSDQEVIREKMNLKQTKVPDRHNNFGGEPRKKSRGSDDILSRHKRLLPQSPLEVGFTALRHQDPVVVHTNAFNIFETSITNAGSAYNPSSGIFRAPANGLYVFFFDIECAKNNGDTYVELVRDGAQTGIRAYCHGSEDVDNSSTLGVLHLSTGDTVWVRLYDGENIQFGWKTLFSGFLL*
LOC111111405	other/uncertain	MVLPSGLSNNVSTKPGLKIFRDEYKSVTAACLDLGFAKKACKSGSYSDKKVVAFDVRLNGHVSNLGTNGRIVFGTVGLNEGKVYNPSTGIFTAPASGMYVFDWTIMTQLGKYAHTAIYVNGNAKSFNHCYDGTLKGYLSCSKMTVVKLKQGDKVWIGVFSGPAYIYQQYTSFSGYKL*
LOC111111780	other/uncertain	MISHVILYESSLLLVCLLGDYLPVKVSGNHGNLWRALIDSLTHGGVGFLSWAVLIQARNSRHFWECGICGIVAMAIDADHFIAAQSFSLKINPSPDQIAFYAYMSTNTQANLPTYHILRFDVVVVNRGEGYHEDDGVFTVPRSGVYVFAWTIAIPTSGWVSVEIVVDGRVVGSSYAHGSDDWDFSTGIVVVQATPGDHVFIRMHQNGSGVINSDPRGRSSFSGWLLF*
LOC111111033	sC1q-like type 2	MGIMYFVRLTILILWVSRNGDCLNLTSHGNDIEKLKESLLQLSTSVQQMQSDYAKEKALFRSEIDQLKNETALLKSQLSSKSGTMVAFTASLSHDINVAVGQTVIFDRVLLNLGNAYHETYGHFTAPVDGIYQFAVSLLNNGRNAYFTLTKNGNEHLVYIYSRHDFVPGTSVIEVQLQARDVVFVKATTDGDLDEGHYCVFSGFLIQQI*
LOC111112984	other/uncertain	MSKAKSYEKHNATAMLENHIKTRSVVSAAPDQIAFYAYMNTNSESNLPVRHILRFDTVIVNEGQGYHQDDGVFTVPRTGKYIFSWTIAAETGGFVSVEIVVDGRVVGSFFANGPYGWDFSTGVVIVQASAGNHVFIRMHQTGSGVIHSDAKGRSSFSGCLLF*
LOC111111409	sghC1q	MRKDVGGTMSLTTGTHKLYQKQQRNWVTLENSRMCLALFVLLLLSIPCTLSDKVSHRLGLKIFRDEYKRVGETCIDLGFAKKPCNSETETKVVAFDVRLTKQVKNLAKNERVVFGTVDLNEGKGYNSSTGIFIAPSAGTYVFDWTTMTYQRAYSHTSLVVNGDFKSWNHCNDGLTKTYVTCSKMAVVKLKQGDKVWIGVFLGPAGLYEQYTSFSGYKL*
LOC111112771	sC1q-like type 2	MECHLLVPAFVFCFAFSQLLCIHGKEIVHQNDSEDLIGRLLSTIERLEGRVKELEVSALQGQKEREEMQAELQGLSEKWSPEHGIAKRQGSSNHNAFYAYMSTNLQYPHPDRTFVFDTVRTNVGSGYSNSSGQFTAPHAGTYVFTWTVVVDATSFVFSELAVNNVPLGNVISDSQENNEYHTTTGLVVAQLNQGDVVKIRSNPKVTIHGSVLSASTHRSSFSGWQLY*
LOC111115493	sghC1q	MFLEFFALCMVLPWALSDNVSTKPGLKIFRDEYKSVTAACLDLGFVKKACKSGSYTEKAVVAFDVRLKNHVNNLATNGRVVFEIEDLNEGNGYDPSTGIFTAPASGVYVFDWTIFTQIGKSASTSLVVNDKFKSWNHCFGGAAKTYLKCSKMTVVKLKQGDKVWIGVFWGTADIHNIYTSFSGYKL*
LOC111112670	sC1q-like type 2	MRIIVLVWLATCIVGNFATIFDSSNLLLKMMSRLEILERKSEKYDGLLQENELLKKLISELSTKVHNLEECKGFKDKEEIHNFEKLSSKVNASQSSKGSVGNENLIQIMPMTEAKQSDGTKDNVMLVSHINKRIDNPSPDQIAFYAYMSTITQANLPTYHILRFDVVVVNRGEGYHKDDGVFTVPRSGVYEFAWTIAIPTSGWVSVEIVVDGRVVGSSYAHGSDDWDFSTGIVVVQATSGDHVFIRMHQNGSGVINSDSRGRSSFSGWLLF*
LOC111115616	sghC1q	MLLVLVALFMITPWAFSDNVSTKPGLKIFRDEYKSVTAACLDLGFAKKSCDSGSYTEKKVVAFNVRLKNSVNGLATNGRVVFANVDLNEWKGYDSSTGIFTSPAAGMYAFDWTILAMPGKFAYTALVVNGKFKSWNYCDGSASKTNISCSKMTVVKLKQEDKVWIGVFAGSAFISEKYTSFSGYNL*
LOC111111409	sghC1q	MCLALFVLLLLSIPCTLSDKVSHRLGLKIFRDEYKRVGETCIDLGFAKKPCNSETETKVVAFDVRLTKQVKNLAKNERVVFGTVDLNEGKGYNSSTGIFIAPSAGTYVFDWTTMTYQRAYSHTSLVVNGDFKSWNHCNDGLTKTYVTCSKMAVVKLKQGDKVWIGVFLGPAGLYEQYTSFSGYKL*
LOC111111410	sghC1q	MFLVLFALFMVLPWALSDNVSTKPGLKIFRDEYKSVTAACLDLGFAKKACKSGSYTEKDVVAFDVRLKNHVNNLATNGRVVFGIEDLNEGNGYDPSTGIFTAPASGVFVFDWTTFTQYGKYASTALVVNGKFKSWNHCYDGAAKTYLQCSKLTVVKLKKGDQVWIGVFNGTANIYRKYTSFSGYKL*
LOC111114169	other/uncertain	MKELDIFQNDTIKVVENPNDRGNCQFASVAHQLSQFGVYRSAQQLRMDAINHIQNWRAYYGEFLTEPLDTYAEKMKCSWEFGDHITLIALAREYNVQFLVVSSAGLAHTVIVSNNNRIENNRQTLTLGHFPEHHYVSITIEKEILTQIVGEISDAQEFENGSPEVELENDSPEVEVENGSSEVEVENGSPEVLVDDDSGETGRSRAVEENRQSTKENLHLETLQRDINSNAGSETGDGPIEEGELYIVSSNTDVDSKAESETSDGQITDGESHQRSLNVDVDRKDGEANENEDISEENSQEVHIYENGGLPPEIWTLEKEIQDLKTENQVLRNDLAKLKTEIEKVKAGDDVSELGENFTVSENEEIQIRNNSVNLKTLIRNADAVAKSAMENIRMSRLA…
LOC111112735	sC1q-like type 2	MELLLCIVTMALCVWSVMPLEERLLIGDNTLQSEIQELRSKMINMEHEIAVLKSMSNTTSTQVVFMSQLSKDLVNPAKGHIVIFDNVITNVGNAYSRITGVFRAPVDGNYMFSLIGTAPPSPGGHAIHLLMKRNLNTIGYLFLDTNHDYYLRRTENSVVSLTKGDEVYVQVDYIVGNHILNGCCFNSHFSGFLIH*
LOC111114117	sC1q-like type 2	MLGIAVFWATVALCSASLNVENELHEIRRVLFHQEKEIQDLKTENQVLRNNLAKLKTEIEKLKADDEDVSELGENITVSENEEIQIRNSSFNLKTLIRNADAVAKSEMENIRMSRLAQEPAAFYAYMSNNEPNPSLHHAIIFDVVKTNVGGGYNEFSGVFTAPSSGIFVFTWTIYTGSHGLTKFHIFVNHDVFDATFGETNGNSDDYDSDSGSMVVSLNAHDHVYMRSAMACSTNIISSSDHARTTFAGWKIMTL*
LOC111115375	sC1q-like type 2	MTPHFILVVLTACFMENYASLNENDDQLKTMMARIEMLELKSEKYDGLIEENELLREKIKENDGRISELNTKVKNLEKRNEYITVESERFQTEIDKTLTQKDDKFNLVAAVKNTLQMNITESKPQNDLVIAKMLERYVQRRLVPFNSPSHQIAFYAYVSDHDQSSLPTHHTLVFDTVKLNRGQGYNENDGIFTVPVTGVYGFAWTVAVHDYSWASVEILVNGEVVGSAYAHAPTGMDFGTGFAIVQANAGDHAFIRMQENGNGAISSNARGRTSFLGWFLF*
LOC111113710	sC1q-like type 2	MAVLQCVFLVSMCLSGSHAMKSGVTDQWALMVERLEMLEKNLYQYMRKYDQLLEENSILKGRSDEYEEKTISLINRMHHFEQSLIEVNERNALCQRDVEKLSRLLGVKTQHVTLKNPKNLKNNLTYDEEIPRIQKRKFGNKMLKLNVSHPPDPNDQVAFYAYLSTNTPANLRQHHTLIFDFVKVNRGQGYHSDDGIFTVPSSGVYVFAWSVSVQDTAGWASTEIVVNGVVCGSTFSQGDTGSYDHGTGIVVVEVHTGDHVYIRMQENGNGVVSSNARGRTSFLGWKLF*
LOC111114800	sC1q-like type 2	MTPHFILVVLTACFMENYASLYENDDQLKTMMARIEMLELKSEKYDRLIEENELLREKIKENDGRISELNTKVKNLEKRNEYITVESERFQTEIDKTLTQKDDKFNLVTAVKNTLQMNITESKPKDDLVIAKMLERYVQRRIVPVNSPSHQIAFYAYVSDHDQSSLPTHHTLVFDTVKLNRGQGYNENDGIFTVPVTGVYGFAWTVAVHDYSWASVEILVNGEVVGSAYAHAPTGMDFGTGFAIVQANAGDHAFIRMQENGNGAISSNVRGRTSFLGWFMF*
LOC111115369	sC1q-like type 2	MTPHFILVVLTACFMENYASLNENDDQLKTMMARIEMLELKSEKYDRLIKENELLKAKIKGNDGKILELNTKVKNLEKPNEYITVESERFQTEIDKTLTQKDNKYNLVAAVKNTLQMNITESKPKNDLVIAKMLERYVQKRIVPVNSPSHQIAFYAYVSDHDQSSLPTHHTLVFDTVKLNRGQGYNENDGIFTVPVTGIYGFAWTVAVHDYSWASVEILVNGEVVGSAYAHAPTGMDFGTGFAIVQANAGDHAFIRMQENGNGAISSNARGRTSFLGWFMF*
LOC111110711	sC1q-like type 2	MHIVKLAVLIMWCSQKGNCLNLTHHGNDVEKLKESLQQLTTSVQQMQADYSRKEALFRSEIDKLKNETSLLKAQLSKSHKLVAFSARLTHHINLNNGQTVIFDTPLMNLGNAYHETYGHFSAPEDGLYQFAVTLLTLSKTSDFGLMKNGNEMLARFYSKEGFTGSTNVVEVILQARDVVFVKATSDGDLDGSYYCMFSGFLIQNL*
LOC111111664	sghC1q	MFLILFALLMVIPWVLSDKVSTKPGLKMFRDEYKSIKETCLDLGFVKKSCNSGSERNVVAFDVRLKNDVNNLASNVRVVFGTVDLKEGIGYDPSTGIFTAPSAGLYVFDWTTLTHLGKYVYTSLVVNDSFKSWNLCRGKSLNTHLSCSKMTIVKLKQGDKVWIGVFSGPANINAKFTSFSGYKM*
LOC111116131	sC1q-like type 2	MASILLLLFFSTVIVGNLVMSYDCYDLLNTVMSRLDILERKSENHDQLLKENEELKKIVKDNQAQISELMMTIRNLKLFVYETRKDANFQNEISSIYIIKDSKIYEGDKGETQLRSAAFMDFRPEKHAEEDLEKDIKKRIRTSLVQVPSDKIAFYAYLSQDTPPNLPVSYILKFDTIKLNLGQGYSQGDGIFTVPRSGVYVFTWTIAVSSSGWSVVDIVLNGEVVGAGNAHAPQGLNTGTGVVVVYANVGDHVYIRLHENGYYVINSNARGRSSFSGWLLF*
LOC111113708	other/uncertain	MNTNSESNLPVRHILRFDTVIVNEGQGYHQDDGVFTVPRTGKYIFSWTIAAETGGFVSVEIVVDGRVVGSSFANGPYGWDFSTGVVIVQASAGNHVFIRMHQTGSGVIHSDAKGRSSFSGCLLF*
LOC111115430	sC1q-like type 2	MASILLLLFFSTGMVGNLAMSYDCHDLLNTVMSRLDILERKSEHHDHLLKENEELKKIVKDNKAQILELMMTIRNLKLNVYETRKGVHFQNEISSLYIIKDSKIYEGEKGETQLKSAAFMDLRPEKHAEEDLEKDIKKRIRTSLVQVPSDKIAFYAYLSQDTPPNLPVSYILKFDTIKLNLGQGYSQGDGIFTVPRSGVYVFTWTIAVSSSGWSVVDIVLNGEVVGAGNAHAPQGLNTGTGVVVVYSNVGDHVYIRLHENGYYVINSNARGRSSFSGWLLF*
LOC111113800	other/uncertain	MNTNSESNLPVRHILLFGTVIVNEGQGYHQDDGVFTVPRNGKYIFSWTIATETGGFVSVEIVVDGRVVGSLFANGPYGWDFRTGVVIVQASAGNHVFIRMHQTGSGVIDSDAKGRSQFSGCLLF*
LOC111113803	other/uncertain	MNTNSESNLPVRHILLFGTVIVNEGQGYHQDDGVFTVPRNGKYIFSWTIATETGGFVSVEIVVDGRVVGSLFANGPYGWDFSTGVAIVQASAGNHVFIRMHQTGSGVIDSDAKGRSQFSGCLLF*
LOC111113699	other/uncertain	MKTNTQANLPTNHILRFDDVVVNRGEGYHEDDGVFTVPRSGVYVFAWTIAIPTSGWVSVEIVVDGRVVGSSNAHGSDDWDFSTGIVVVQATSGYHVFIRMHQNGFGVINSDSRGRSSFFGWLLF*
LOC111114708	other/uncertain	MQTTEELEAPQFFVEFSRDEFSPRPGQALEFDNILHDNMKSYDAMSGMYTFPLSGMYHVTVTMTVKRSTTMKLELMHNGDVVTSIEENYRGTSSKVISAREGDQLWVRKVNLGGSMLCKHTGFSGYLVSDMHTGMEDT*
LOC111114976	sghC1q	MLVGVHFVIVLTFWGSISCDLTLEDVYQEVLDLRHAVGDMQTKIQLQDEKIGELNGIIRKQQDLLRHSAAEGKLGGFLGNYVHHKDIESESTDEAGERGIDSSHTQKPPKRKHQIAETVLRNDDHEREGRLLTGPVPDETTSGIVAFYTYLSTVLAHTDLGQDHTIKFDVVKTNEGQGYHPGSGVFIAPETGFYVFVWTIRVGAYNASLEYHSTELLINNIVYGSVYALAFPDSSKDDSGTGTVVAHVNKGDDVYIRTHSAHHGKGGILSEGFGRSSFAGWKIN*
LOC111115218	sC1q-like type 2	MGSTTNMAPFVKYLIFTAVCLLIGGSCGEHSLDRRANVVKRSDNDTYYNIYTKINTLEKYVSNLETKLQTRAKLLRQVLKSVLELDSNLGLPKKNLKKENIQASKKNAVGFTTKLQQMTYSSTSSIIRGSPILYNGGNAYNGTVFTCPSPGLYFFHVSMLTNTKSGGIWIYKNSQQLTLAFAGNGDPQWNGASVSAAVWLDVGDQVYLRPHRSSLRIDYNSAFTGVKIN*
LOC111112022	sC1q-like type 2	MTCFVKCLLFLAVCLIIGDRVAANSLDKRTSFAKRTDKDTYYNIYTKINALEKDLKNMETRLQKKNKLLRQVLQSVLEDSNLELPDKSLKKQTNLASKKNAVGFTTRLGSATYRSSSSIIGGSKIFYNGGNAYNGTVFTCPSPGLYLFYVSVMTNTRNSGIRIYKNSQQLTLAWSGMGSPQYNGASTSAVVWLDVGDQVFLRPYGSSLVVTGESVFTGVKVN*
LOC111111007	sC1q-like type 2	MSDLLKCLWCVAVVLMAGILVESNPLAEYSINNTNEYNIYAKIDSLEKNLQHLQTSVINRNKLMKQIFLAITELNVDPAMFDVDLKSPVLQTKTKNGIVISEEDTSIGFTTRLYPAIYSNPSSIIRGGTILYNGGNAYNGTVFTCPSPGLYHFHVSVVTNTETNGIWIYKNSQQLTLAYAGDGNSRRNGASTSAAVLLNVGDEVYLRPYTSPLHVSGHSGFTGVKVN*
LOC111111866	sC1q-like type 2	MDSATNMTTFVTFLLFLVVGLMIGGSCGEHSLDRRANVAKRSDNDTTYYNIYTKINTLEKYVSNLETKLQKRAKLLQKLLKSVVEIDGNIGLSEKSPKKNAVGFTTKLQQSTYSSTSSNIRGSTIIYNGGNAYNGTVFTCPKPGLYLFHVSLLTRTKYGGIWIFKNSQALTLAYAGYVDSQYNGASVSAVVWLDVGDQVYLRPSTSPMLVDNNAVFTGVKVN*
LOC111114342	sC1q-like type 2	MMSKVTRFCFMVSFSVFLGRNFISAENNPTDDWKGMVERRLMYLEEELKIQKHINAKLQEENENLHHETRQLQDQVLECASKMEEIQIQNSLNQNLNQHDEHDLDDTHTSTNFKESKTVKRIVPQSPVDAEPVAFYSYIASDTTHRLQTHQTLIYDTVKLNKGNGYHGDDGIFIVPRTGIYAFAWTQGVSNHGWVTTEIAINGQKYGRAIADGDEKSYDVSSGTGFVIAEVNSGDHVYIRMQDTSSPILFGDHLTSFSGWKLY*
LOC111112021	sC1q-like type 2	MMSQLLSFLWCIAFIMMAGILVRGHPIADQTSNNTEDNGYYNIYSKIDSLEKSLQNLQTGVQNRNKLLQQVFLAIGEFGADPAMTDVNLKSLVLQTKGKNDTAIGFTTKLFDQTYSSSSSIIRGETILYNGGKAYNGTVFTCPSPGLYLFHVSVMTGTKGNGIWIWKNSQQLALAYSGSGDPQYNGASVSAALWLDVGDQVYLRPHAASLYLSNNSVFTGVKVY*
LOC111110866	other/uncertain	MDSNLGLSDKNLKKERKLAQEKNALGFTTKLSGSYSSSSSIIKGSKILYNGGNAYNGTVFTCPSSGLYLFHVSLLSSTKNNGCWIYKNSQQLTLAYTGGNPQYNGASVSAAVWLDVGDQVYLRPYSSSLYVDHNSAFTGVKVN*
LOC111111909	sC1q-like type 2	MSPFVTLLMFLVVSLLIGGSCGDRSLGRRTNVAKRSDNNTCNNIYTKINTLEKDLSNLEKKLRKRTKLLQQVLRSVLEMDSNLEMSETNLASKRNAIGFTVKLPTTTYTSRSSNILGNPILYNGGNAYNGTVFTCPSPGLYLFHVSMLTKTKYGGIWIYKNTQQLTLAYAGYGDPQWNGASVSAAVWLDVGDQVYLRPHNSPMVIDQNSVFTGVRVN*
LOC111116079	sC1q-like type 2	MSPFVTLLMFLVVSLLIGGSCGDRSLGRRTNVAKRSDNNTCNNIYTKINTLEKDLSNLERKLRKRTKLLQQVLRSVLEMDSNLEMSETNLASKRNAIGFTAKLPTTTYTSRSSNIQGNPILYNGGNAYNGTVFTCPSPGLYLFHVSMLTKTKYGGIWIYKNTQQLTLAYAGHGDPQWNGASVSAAVWLDVGDQVYLRPHNSPMVIDQNSVFTGVRVN*
LOC111112019	sC1q-like type 2	MLSRLGLVFLFVVQTNSLSNLTDDKTQTTTTFIRYLLNQETLIRMALDRKVNDLVNSMTAMENKMVTTKMEIAALRHENSALKAELQVQSNVTTLLSDTLKTTISSLKQSQDSQRELSFAVSSLQAFQKNMFLDAETSIGFTTRLYPAIYSNSTSIIRGSTILYNGGNAYNGTVFTCPSPGLYLFHVSMVTNTETNGIWIYKNSQRLTLAYAGDGEPQRNGASTSAAVWLDVGDQVYLRPYSSPLHVSGNSGFTGVKVN*
LOC111115763	sC1q-like type 2	MDLPTNMTPFVKCLMFTVVCLMIGGSYGEHSLERRANVSKRTDKNTYYNIYTKINAMEKDLKNLETKLQKRTKLLRQVLQSVIEVDSNLGLSDKNLKKERKLAPKKNAVGFTTKLSGSYSSTSSNIRGRDNSILYNGGNAYNGTVFTCPCPGLYLFHVSLMTHTKRGGIWIYKNSQQLTLAYAGNGDPQWNGASVSAAVWLDVGDQVYLRPHSSLSVDGNSAFTGVKVN*
LOC111112017	sC1q-like type 2	MLSRLGLVFIFVVQTNSLSNLTDDKTQTTTTFIRHLLNQETLIRMALDRKVNDLGNSMTAMENKMVTTKMEIAALRHENSALKAELQVQSNVTTLLSDTLKTTINSLKQSQDSQRELSFAVSSLQAFQKNMSLDAVTINEKLQDAKREIQINNQQLQDAKREIVTINKQLQNTETKLETNNQQLQSATMEIGALRHENSALKAELQVQSNVTTHLSDNLKTTINSLKQSQDSQRELSFAVSSLQAFQKNMSLDADTSIGFTTRLSQKTYESSRSIIRGSKILYNGGNAYNGTVFTCPSPGLYLFHVSLITSTKSYGIWIYKNTQQLTLAHSGNEPQYNGASVSAAMWLDVGDQVYLRPYTSFLYVDGNSAFTGVKVN*
LOC111115723	sC1q-like type 2	MSQLMRFLWCIAVIMMAGIPVRGHPIADQSSNNTEDNGYYNIYSKIDSLEKSLQNLQTGVNNRNKLLQQVFLAIAEFDADPAMTDVDLKSLVLQTKSKNDTAIGFTTRLYETTYSSSSSIIRGSPILYNGGNAYNGTVFTCPSPGLYLFHVSLITNTKNNGIWIYKNTQQLTLAYSGNEPQYNGASVSAAVWLDVGDQVYLRPYTSSLFVDGISAFTGIKVN*
LOC111112209	sC1q-like type 2	MAQVFTILWFVAVSFMIGGKVNAYSLVDRSDVSNSSEEYGYYNIYDKIDSLQTTFQTLETNMQRKNNMLRQVLQSITEMDDNIEMSDQSSQGTTTIQPVQNKAVGFTAKLPTTTYNSSSSIIRGTPILYNGGNAYNGTVFTCPSPGLYLFQVSLLTRTKYGGIWIYKNTQQLTLAYAGYVDPQYNGASVSAAVWLDVGDRVYLRPSGSSLSLDGNSVFTGVKIY*
LOC111115055	sC1q-like type 2	MSKVSGFWFLVSVSVFLGINCISAESNPTDDWKGTIERRLRYLEQELIIQKNINAKIHEENEHLRQQTKHLQDQVLECAFKMGEIIGNQMFGNQNSLNQKLNQQDEHHLGDTPISTIFKDAKTVKRTVPSSPVDAEPVAFYSYIASDITHRQQIHHTLVYDTVKLNKGNGYHSDDGIFIVPHTGTYAFVWTLGVSRHGYVDTEIVINGQKYGRAFADGDGDSLDFGTGFVIADVNGGDHVFIHYACDPTVYGDGITSFSGWKLY*
LOC111110909	sC1q-like type 2	MTPFVKGLLALAVCLIMKDRVGANSLDKRTSFAKRANKDTYYNIYTKINALEKDLKKKLKTRLQKKNKLLRQVLQSVKEMDSNLELPDKSLKKQTNLASKKNAVGFTTRLKGTTYSSTSTIIQGNTIFYNGGNAYNGTVFTSPSPGLYLFSVSVITNTKNSGIRIFKNSKPLTLAYSGYGNPQYKGASVSAALWLDVGDQVYICPYGSSLLVNGESVFTGVKVN*
LOC111115354	sC1q-like type 2	MSTLINLLWLVLVNVMVEYRVESFLFNVHANVSGSPSDNGYYNIYSKIDSLERALQNLETSVQQKETHMDTLLRQVLLTVNEMDAKIESSGLHKIESNELRLQNMSLEIEQLKAFTKNDTAVGFTTKLYGTTYRSTFSIIRGSPILYNGGNAYNGTVFTCPSPGLYLFHVSMLSSTSDSGIWIYKNSQQLTLAYSGGDPQNNGASVSAVVWLDVGDQVYLRPYSLSLNLDPNSAFTGVKVN*
LOC111115982	other/uncertain	MYLEEELKIQKNINARFQEENENLRQQTRNLQDQVLECAFKISDIISNQMTGKQNPPNQNINQQDEHHLDDTHISTIFKDSKTVKRIVQSSPVDAEPVAFYTYIASDITHQQPTRHTLIYDTVKLNRGNGYHGDDGIFIVPHTGTYAFAWTFGVSINGYADTEIVINGQKYGRAFAKGDGESVDFGTGFVIADVNGGDHVFIHYACDPTVYGDGMTSFSGWKLY*
LOC111115358	sC1q-like type 2	MSRLINLLCLVSANAIIGNKVESFLLNGHANVSGSPPDNGYYNIYSKIDYLERVLQNLETSVQQKETHMDTLLRQVLLTVNEMDAKIESSGLHKIESNELRLQNMSLEMDQLKALTKNDMAVGFTTMLSGSYSIPSSIIRGSQILYNGGNAYNGTVFTCPSPGLYLFHVSLVSSTQFGGILIYKNSHSLTVAYAGDGHPENNGASVSAAVWLDLGDQVYLRIYRSPLSLHGSSAFTGVKVN*
LOC111115982	sC1q-like type 2	MMSKMTDFCFFVSFSVFLGINFISAESNPTDDWKGTVERRLMYLEEELKIQKNINARFQEENENLRQQTRNLQDQVLECAFKISDIISNQMTGKQNPPNQNINQQDEHHLDDTHISTIFKDSKTVKRIVQSSPVDAEPVAFYTYIASDITHQQPTRHTLIYDTVKLNRGNGYHGDDGIFIVPHTGTYAFAWTFGVSINGYADTEIVINGQKYGRAFAKGDGESVDFGTGFVIADVNGGDHVFIHYACDPTVYGDGMTSFSGWKLY*
LOC111112018	sC1q-like type 2	MLSRLGLVFLFVVQTNSVSVLTDDKFQPSTILIRQLLNQETLIRMALDRKVNDLVKSMTEMKNKMVTTNEKLQDAKREIQINNQQLQDAKRESETNKQELQDAKREIVTINMQLQNTETKFETNNQKLQDAKREIQFNKQQLQDAKGEIETNNQHLQNATMEIAALRHENSALKAEWQIQSNVTALLSAVGFTTKLSGNYGSSSSIIRGHTILYNEGNAYNGTVFTCPSPGLYVFYVSVITKTTNSGIWIYKNSQQLTVAWFGGDPLWNSASVSAAMWLNIGDQVYLRPQSSTLNVDHNSVFTGVKIN*
LOC111110735	sC1q-like type 2	MSPFETLLMFLVVSLLIGVSCSLDRRTNVTKRTDNDTYYNIYTKINTLQKDLKNLETKLQTRTKLIRQVLKSVIEMDSNLEMSEKNQKKQTNLASKRNAIGFTVKLPTTTFNSRTIILQGGQILYNGGNAYNGTVFTCPSPGLYLFHVSVVTKTRYGGIWIYKNTQQLTLACAGHGDPQYNGASVSAAVWLDVGDQIYLRPNNLPMVIDHNSVFTGVKVN*
LOC111114058	sC1q-like type 2	MHQEIFFEKMKCLVVLLLIVSSKNARAAEETTLQSVLEELENLKTKIGSLEENLKSVTEQNRKLQEEVVHLKSDQEVIREKMNLQQAKVPNRSKNFGGEPRKISRGTGDIILSRHKRLISQSPLEVGFTALRHQVSVVLHTNAIIIFETSITNAGSAYNPSSGIFRAPANGLYVFFFDIECASNNGDTYVELVRDGAKTGVQAYCHGSGDVDNSSSIRRLHRGVN*
LOC111110885	sC1q-like type 2	MSPLGTVLMFLVVSLLIGGSCGDRSLGRRTNVAKRSDNNTCNNIYTKINTLEKDLSNLERKLRKRTKLLQQVLRSVLEMDSNLEMPETNLASKRNAIGFTVKLPTTTFNSRTIILQGGKILYNGGNAYNGTVFTCPSPGLYLFHVSVVTKTRYGGIWIYKNTQQLTLACAGHGDPQYNGASVSAAVWLDLGDQIYLRPNNLPMVIDHNSVFTGVKVN*
LOC111114231	other/uncertain	MEIAALRHENSALKAELQVQSNVTIHLSDKLKTTINSLKQSQDSQRELLSAVSSLQAFQKIMSLDADAKRVIQINTQQLQDAKREIVIINKQLQNTETKFETNNQQLQSATMEIAALRHENSALKAELQVQSNVTTLLSDNLKTTIKSLKQSQDSQRKLSFAVSSLQAFQKIMSLDAGSALVKHPVASQIWTHNNTSIGFTTRLSGTTYNSSSSIIRGDTLLYNGGNAYNGTVFTCPSPGLYLFLVSLITNTKNNGIWMYKNSQYLTLAYSGGKPRHTGAPASAAMWLDVGDQVYLRPYGSSLYLDGNSAFTGVKVN*
LOC111112346	sC1q-like type 2	MMPRFVNLLWLVSANAIIGSKVESFLFNGHANVSGSPPDNGYYNIYSKIDYLERALQNLETSVQQKETHMDTLLRQVLLTVNEMDAKIERSKLQNISLETEHLKALTKNDTAVGFTTKLSGSYNSSNSIIRGYNILYNGGNAYNGTVFTCPSAGLHLFQVTLLTSSIAKGIWIYKNSNELTLAYSGNTQWNGASASAVVWLEVGDQVYLRSHGSPLPLDPYSAFMGVKVN*
LOC111115653	sC1q-like type 2	MTPFVICLMFTVVGLLIGGSCGEHSLDRRANVVKRSDKNTYYNIYTKINAMETDLKNLETKLQKRTKLLRQVLQSVLEMDSNIGLPDKNQKNQTNLTSKENAVGFTTYLYGSYTNTSDIIQGSSILYNGGNAYNGTVFTCPSSGLYLFHVSVLTNTTNNGIWIYKNSEHLTLAWSGGDPQRNGASVSAAVWLEVGDQVYLLPHSSSLSVDSGSAFTGVKVN*
LOC111112347	sC1q-like type 2	MTLFCNLLVFVFVDLIIDARVESFLFNGHANDSGSPPDNGYYNIYSKIDNLKRVLQNLETSVQQKETHMDTLLRQVLLTVNETDAKIESNELRLQNMNLEMEQLKTFTKNDTAVGFTTVLSGSYSSTSSIIRGSLILYNGGNAYNGTVFTCPSPGLYLFHVSLMSNSRLGGILIYKNSQQLTLAYTGDENPHVNGASVSAAVWLSVGDQVYLCPYSSPLWINLNSAFTGVKVH*
LOC111115877	sC1q-like type 2	MLTSITTLCLVSVHMMVEYRVESFQLNGHANASESHPDHDYYNSKIDYLERALQNLETSVQQKETHMDTLLRQVLLTLNKIDAKTSGLQKMSFEIQHLKALTKNDMTFGFTTKLSGSYNSTSSIIRGYDILYNGGNAYNGTVFMCPSPGLYFFHVSLIAINYSTRIWIYKNSQQLTLAFSGIQETGGNGAPMSAAVWFGFGDQVYLRPFDSSSLFVDSNSVFTGVKVN*
LOC111112020	sC1q-like type 2	MRSQLMRFLWCIAFIMMAGIPVRGHPIADQTSNNTEDNGYYNIYSKIDSLEKNLQNLQTGVKNKNKLLQQIFLAIAELDADPAMTDVDLKSLVLQTKSKNDTAIGFTTRLSSTTYSSTSSIIRGDTLLYNGGNAYNGTVFTSKSPGLYLFHVSLLTDTVSNGIWIYKNSERLTLAWTGNINSQFNGASASAAVFLDVGDQLCLRPNGSRLKVDGNSVFTGVKVN*
LOC111115056	sC1q-like type 2	MMSKMTGFCFLVSCSVFLGRNFISAESNPTDDWKGMVERRLMYLEEELKIQKHINAKLQEENEKLHHETRRLQDQVLECASKMEDIIGNQKQNSLNQNLNQHDEHDLDDTHTSTNFKESKTIKRIVPPSPVDAEPVAFYSYIALDTTHKLQMHQTLIYDTVKLNKGNGYHSDDGIFIVPRTGIYAFVATTEIAINGQTYGRAFADGDQATDDVGFGTGFVIAEVNAGDHVYIRMHDTGFPVLFGYGVTSFSGWKLY*
LOC111111910	other/uncertain	MQRKNNMLRQVLQSITEMDDNIEMSDQNSQGTTTIQPVQNKAVGFTAKFPTTYNSSSSIIRGSPILYNGGNAYNGTVFTCPSPGLYVFQVSLLTRTKYGGIWIYKNAQQLTLA*

## Sheet: Chr10
Gene	Type	Protein Sequence
LOC111116616	sC1q-like type 2	MSGKLLFLFVVFEFSRVLHAASVGSNSLDDYERLRQRVQRESMITTTIMNSVNVLQLEFSNMITDQKQQNADIKLLLQQVAALSKLNTQLNSELNQMKRNSTESNMRLNDMINQNSNKVNGVSNKIVKEIGDVRKEISRQNNDIELLQVDINQLKRSSVDERAFTEKVTSITQQIGEVKTANGMNSHVIEELQQEVNNLKETTVKQTDFQEKYSQMTNEMENVKSNGVNNSYVISEIQNEVETIAFNQSRHDNNLMYLNQKVKSLEKRTDNLETAMENMSVSLSSYDSSTKGMSTVISEMQGDLTSVQDSSKDLGEIVLRLTNDMMFLQSNTVQLTDSISGLENNVTSLLLDSDKHDDSLRNLKKNVSIVQDVQNAMESDIFKQRKYLLSQKDSSEGMA…
LOC111117055	sC1q-like type 2	MSQFGLFVVWVLVFGMVHCNVSPETDSLSHVDVKDLMQRMILQEESLRKEKERNNELEEKVNFLVTNLEHTKRTFEDKCASLEQQLQRHQDSETKQSLSNAHHSTADKGQEDHRNNRGNKPFIDWQRLWYSSLKNHKVNAAAKINSPKLQRRLLVQPSPVTPLPLAFYAQKSSSTPKSEAGGDRVIVYDNVKTNSGNGYHPSTGVFIVPESGMYVFTWSFRNGFDEYQSTQLMVNNNEEGLMLLNQASDSSVSATGIAVLHVNKGDDVYVKISSLTSHTGTVAGDQWGKSFFAGWRLN*
LOC111117531	sC1q-like type 2	MSQFGLFVVWVLVFGMVHCNVSPETDSLSHVDVKDLMQRMILQEESLRKEKERNNELEEKVNFLVTNLEHTKRTFEDKCASLEQQLQRHQDSETKQSLSNAHHSTADKGQEDHRNNRGNKPFIDWQRLWYSSLKNHKVNAAAKINSPKLQRRLLVQPSPVTPLPLAFYAQKSSSTPKSEAGGDRVIVYDNVKTNSGNGYHPSTGVFIVPESGMYVFTWSFRNGFDEYQSTQLMVNNNEEGLMLLNQASDSSVSATGIAVLHVNKGDDVYVKISSLTSHTGTVAGDQWGKSFFAGWRLN*
LOC111117900	sC1q-like type 2	MMLGSLFFYLCLFIYNGVLGYSVDGVVDKLQNLETKLEVMYEIVTQLRTENKDLKIRVEILEELIKHKDAGLQSIKVSETNESNATEADLVLNMLPERSKEISYRKNWKRIVPVPDTSAPSAVIAFHSYLSHDSTGPLPNHHVLQYDVVPLNRGNGYKNFDGIFNVPVSGTYVFTWSIMADAHGFVHTQLMKNAEVIGTRYADSDTATVWDFSTGVVVVDAAQGDHVYIRLGDPSKGKVQSISQSRSTFSGWLLG*
LOC111117362	other/uncertain	MTKTVAHLTTENDDLRARVTVLEGLISSDGNTSPLSKPKEESNGLSHNPESISFEEGVESERLDDLQQNTSRRLVNGENYDQRRKSIVRTPPSPTGVIAFHAYLSKDSSGPLPIHHVLTFDVVTLNKGQGYNAFDGIFVVPVAGTYVFTWSFMSEPHGTVYTQLMKNAEVIGRRYADSATASVWDFSTGVVVVDVAVGNHIYVRLGYESNGKVLSIAESKTSFSGWLLD*
LOC111116588	sC1q-like type 2	MGFRLPFLFLCLSICDGALGYSVTDLVDKLQNLEKKFVVMTKTVAQLTSENDDLRARVTVLEGLISSDGNTSPLSKPKEESNGLSHNPESISFEEGVESERLDELQQNTSRRLVNGENYDQRRKSIVRTPPSPTGVFAFHAYISKDSSGPLPIHHVLTFDVVSLNKGDGYNAFDGIFVVPVAGTYVFTWSFMSEPHGTVYTQLMKNADVIGTRYAESATASVWDFSTGVVVVDVAVGNHIYVRLGYESNGKVLSITESKTSFSGWLLD*
LOC111117656	other/uncertain	MESKLMSENEELRARVAALERLVSNCDCTEKQPIQIKEPNEHPVQKMNPSVKQLRSNEKDLVKDQKRIVPPTMTPTGVIAFHAYLSKDSNGPLPIHHILKFDTVPLNRGHGYNVFDGIFEVPASGTYVFTWSFMSEAQGNVSTELMKNADVLGTRVADSASSTVWDFSTAIIVTDAAQGDHVYVRMAHTSYGKVLSLSKSRTSFSGWLLN*
LOC111117054	sC1q-like type 2	MSQFWLFGVWVLVFGMVQCHESPETESLSYVDVKNLMQRVILLEESLRMEKERNDELEEKVNSLVTNLEQTKRKFEDKCTSLEMKLQKHQDSETKSGLFDTHHSAENKTQKLKNDHKPFIDWQRPWYSLLKTHESNAGPEVRERISSPNLQRRLLVQPSPVTPLPVAFYAQKSSTTPKSEAAADRVIVYDNVKTNTGNGYHPSIGVFIVPESGMYVFTWSFRNGYDEYQSTQLMVNNNEEGRMHLHQAPVGSASATGISVLHVNKGDDVYVKISSFTSHTGSVISDNWGKSFYAGWRLN*
LOC111117489	sC1q-like type 2	MSQFWLFGVWVLVFGMVQCHESPETESLSYVDVKNLMQRVILLEESLRMEKERNDELEEKVNSLVTNLEQTKRKFEDKCTSLEMKLQKHQDSETKSGLFDTHHSAENKTQKLKNDHKPFIDWQRPWYSLLKTHESNAGPEVRERISSPNLQRRLLVQPSPVTPLPVAFYAQKSSTTPKSEAAADRVIVYDNVKTNTGNGYHPSIGVFIVPESGMYVFTWSFRNGYDEYQSTQLMVNNNEEGRMHLHQAPVGSASATGISVLHVNKGDDVYVKISSFTSHTGSVISDNWGKSFYAGWRLN*
LOC111117876	sC1q-like type 2	MVRLGSLLLLLTYTLGFIEGSDGKELPVPISDVMERLVDLEKRLLVQEEKNADLEKRLLEQEILNKAQGDIIQNMASCACPSNEKATTYLSDGSVNPYPSDVEHSQENSSSFNGQINESLPLHHTQTIPSHSVSQIKSNPKTKRDITGRVAFYAYMSHNEDRVGHHQTFVFDHVVTNVGGNYNRHSGIFTSPSQGVYVFSWTLYCETGGYFYSEVVVNSGPVGALRCSAEGVNYLSHVTGVVLVEINQGDIVYIRTHPSNSNIGGVYSSSDYRSSFTGWKLF*
LOC111117458	other/uncertain	MSSCDCTPKGKGRQYVVADSVKPYTSNGEGSQIKPSSFHGQMNESLSQHIAQNLEGHLIKRSLFGQIESNTKVKRDITGPVAFYSYMSRTDMHPKPNQTIVFDHVVSNSGGNFDHKTGIFFPSQEGVYVFSWTVYCSNGGYLVTELVVNNKPIGAMLCSGQGADNLRHTTGVAAVALGRRDSVYVRSHPTAVLNGVIWSAPTYLSSFTGFQIS*
LOC111116241	sC1q-like type 2	MVHLGCILILFVFPLIDGIDGENLPDHFLHIMERLTDLENRLHLQEEKNVDLEKRLSDQEKLNAIQMEIIQELATCDCTSKEKETLLSNRNRNFSSAEPYSSNIESTNTDGSFHVNKTKRNNARKEVLLHDDLKGLSSSPGLIEFNRKNKRETSVVPAFHAYMSTPETDPGPHHTFIFDRVVTNIGGNYNHHTGIFTATESGVYVFSWTVFCYDERLHELEKRLHVQEQKNVHLEKRLSDQEKLNAIQTELIQELTSCDCKFKEKDTVLSHDDGNHSTEDPYSGKIESVNTDGTFHENTTRRKSVSKEDLLNDDFNGSSSPGQIEYNRKNIREVAVGPAFHAYMTDSEADPGHHHTFIFDRTVTNIGGNYNHHTVRLLS*
